# Supplementary material for: Mediator-free electrochemical trifluoromethylation: a cascade approach for the synthesis of trifluoromethylated isoxazolines
Source: Royal Society of Chemistry journal article supplement (doi:10.1039/d3cc00231d), 2023-01-01

## **Supporting Information**

### **Mediator-free electrochemical trifluoromethylation: a cascade approach for the synthesis of trifluoromethylated isoxazolines**

Kingshuk Mahanty<sup>†, a</sup> Suman Kumar Saha<sup>†, a</sup> Atreyee Halder<sup>a</sup> and Suman De Sarkar<sup>\*a</sup>

Department of Chemical Sciences, Indian Institute of Science Education and Research Kolkata,  
Mohanpur-741246, West Bengal, India

<sup>†</sup>These authors contributed equally

Email: [sds@iiserkol.ac.in](mailto:sds@iiserkol.ac.in)

### **Table of Contents**

|                                                                     |     |
|---------------------------------------------------------------------|-----|
| 1. General Information                                              | S2  |
| 2. Procedure for Optimization Study                                 | S3  |
| 3. General Procedure for Electrochemical Trifluoromethylation (GP1) | S3  |
| 4. Procedure for Gram Scale Synthesis of <b>2o</b>                  | S4  |
| 5. Synthetic Derivatization of <b>2o</b>                            | S4  |
| 6. Characterization Data for Synthesized Compounds                  | S5  |
| 7. Mechanistic studies                                              | S15 |
| 8. General Procedure for Cyclic Voltammetry (CV)                    | S18 |
| 9. Crystallographic Data                                            | S19 |
| 10. Image of Divided Cell Setup                                     | S21 |
| 11. References                                                      | S22 |
| 12. NMR Spectra for Synthesized Compounds                           | S23 |

## General Information:

Electrochemical reactions were performed under air using pre-dried glassware. MeCN and other solvents were purchased from Merck Life Science Private Limited and were directly used without further drying or purification. All reagents were obtained from commercial sources and used without further purification. Sodium triflate as trifluoromethyl source was purchased from TCI. Other chemicals were bought from Avra Chemicals and BLD Pharmatech and used without further purification. Oximes (**1a-1q**)<sup>1</sup> and (**1r-1v**)<sup>2</sup> were synthesized following reported procedures. AXIOMET AX-3003P power supply was used for electrolysis. Platinum electrodes were purchased from Indane Chemical Company, India. Graphite and other electrodes were purchased from IKA. Yields refer to isolated compounds estimated to be >95% pure as determined by <sup>1</sup>H NMR. Nuclear magnetic resonance (NMR) spectroscopy was performed using JEOL 400 MHz and Bruker 500 MHz spectrometers, chemical shifts ( $\delta$ ) are provided in ppm. Thin layer chromatography was performed on Merck pre-coated silica gel 60 F254 aluminum sheets with detection under UV light at 254 nm. Chromatographic separations were carried out on Merck silica gel (100–200 mesh) and (230–400 mesh). Cyclic voltammetry was measured on Klyte Research Model 263A. High-resolution mass spectra (HRMS,  $m/z$ ) were recorded on a Bruker Maxis Impact (TOF) and Waters XEVO G2-XS QTOF mass spectrometers.

## Procedure for the Optimization Study:

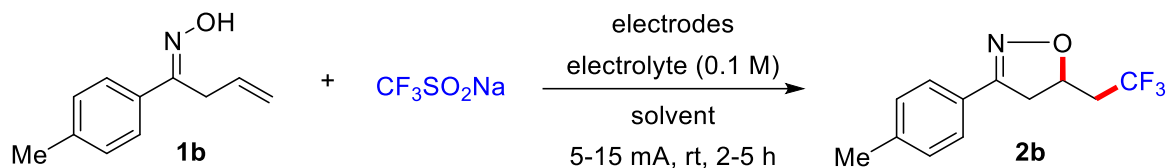

1-phenylbut-3-en-1-one oxime (**1b**, 53 mg, 0.3 mmol), sodium triflate (1.5-3.0 equiv), and electrolyte (0.1 M) were taken in a dry undivided cell and dissolved in 6 mL of solvent. The cell was equipped with electrodes and the reaction mixture was electrolyzed at 5-15 mA constant current under air atmosphere and room temperature for 2-5 h. After the completion of the reaction, the reaction mixture was concentrated under vacuum and purification was performed by column chromatography in 230-400 silica gel using 1.5% ethyl acetate in hexane to deliver (**2b**, 42-72%) as a white solid.

## General Procedure for the Electrochemical Trifluoromethylation (GP1):

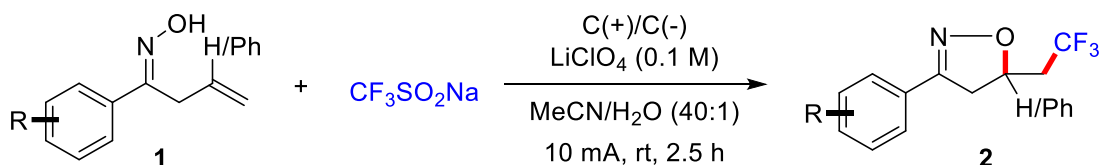

Oxime **1** (0.3 mmol, 1.0 equiv), sodium triflate (140 mg, 0.9 mmol, 3.0 equiv), and lithium perchlorate (64 mg, 0.1 M) were taken in a dry undivided cell and dissolved in 6 mL of MeCN/ $\text{H}_2\text{O}$  (40:1). The cell was equipped with graphite (5.2 cm×0.8 cm×0.2 cm) both as cathode and an anode. Thereafter the reaction mixture was stirred and electrolyzed at a constant current of 10 mA under air atmosphere and room temperature for 2.5 h. After the completion of the reaction, the reaction mixture was concentrated under vacuum and purification was performed by column chromatography in 230-400 silica gel using 1.5-5% ethyl acetate in hexane to deliver trifluoromethylated isoxazoline **2**.

## Procedure for the Gram Scale Synthesis of (2o):

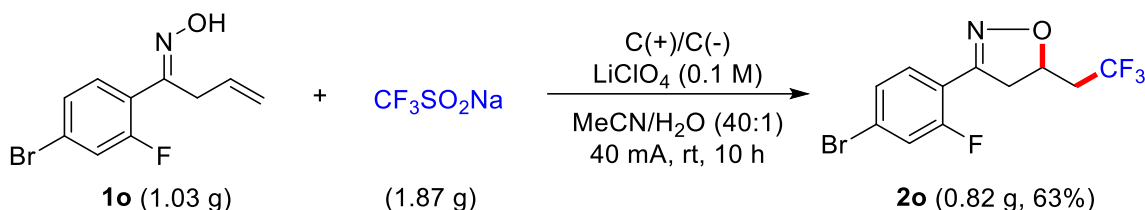

1-(4-bromo-2-fluorophenyl)but-3-en-1-one oxime (**1o**, 1.03 g, 3.96 mmol), sodium triflate (1.85 g, 11.9 mmol, 3.0 equiv), and lithium perchlorate (0.75 g, 0.1 M) were taken in a dry undivided cell and dissolved in 70 mL of MeCN/H<sub>2</sub>O (40:1). The cell was equipped with graphite (5.2 cm×3.2 cm×0.2 cm) both as cathode and an anode. Thereafter the reaction mixture was stirred and electrolyzed at a constant current of 40 mA under air atmosphere and room temperature for 10 h. After the completion of the reaction, the reaction mixture was concentrated under vacuum and purification was performed by column chromatography in 230-400 silica gel using 5% ethyl acetate in hexane to deliver 3-(4-bromo-2-fluorophenyl)-5-(2,2,2-trifluoroethyl)-4,5-dihydroisoxazole (**2o**, 814 mg, 63%) as a solid.

## Synthetic Derivatization of 2o:<sup>3, 4</sup>

a)

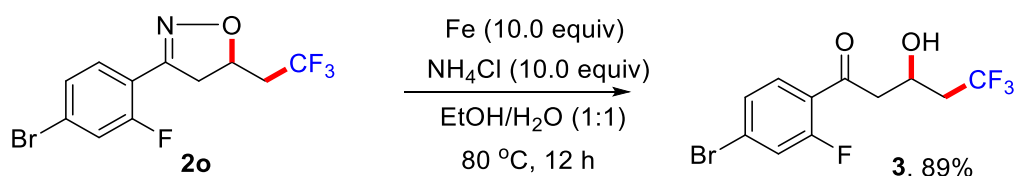

Fe powder (168 mg, 3 mmol, 10 equiv) was added to isoxazoline **2o** (100 mg, 0.3 mmol, 1 equiv), and  $\text{NH}_4\text{Cl}$  (160 mg, 3 mmol, 10 equiv) in ethanol, and water (1:1, 15 mL) mixture. Then the mixture was stirred at 80 °C for 12 hours. After the reaction was completed by TLC monitoring, the reaction mixture was cooled to room temperature, diluted with ethyl acetate, and filtered. The filtrate was washed with water and the organic layer was separated. Then the combined organic layer was dried over  $\text{Na}_2\text{SO}_4$ , evaporated under reduced pressure, and purification of the product by column chromatography in silica gel using ethyl acetate in hexane yielded **3** (87 mg, 89%).

b)

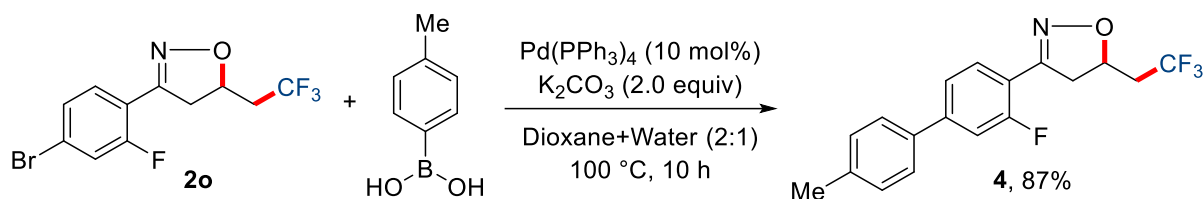

Isoxazoline **2o** (67 mg, 0.2 mmol, 1.0 equiv), *p*-tolylboronic acid (65 mg, 0.24 mmol, 1.2 equiv), and potassium carbonate (55 mg, 0.4 mmol, 2.0 equiv) were taken in an oven-dried 50 ml schlenk round-bottom flask equipped with a stir bar under argon atmosphere. Thereafter 3 ml of degassed dioxane and water (2:1) solvent was added. Then tetrakis(triphenylphosphine)palladium(0) (23 mg, 0.02 mmol, 0.1 equiv) was added under argon atmosphere and the reaction was stirred at 100 °C for 10 h in an oil bath. After the completion of the reaction, the reaction mixture was cooled to room temperature, diluted with ethyl acetate, and washed with water and the organic layer was separated. Then the combined organic layer was dried over Na<sub>2</sub>SO<sub>4</sub>, evaporated under reduced pressure, and purification of the product by column chromatography in silica gel using ethyl acetate in hexane yielded **4** (59 mg, 87%).

## Characterization Data for Synthesized Compounds:

### 3-phenyl-5-(2,2,2-trifluoroethyl)-4,5-dihydroisoxazole (**2a**):<sup>1</sup>

**GP 1** was followed using 1-phenylbut-3-en-1-one oxime (**1a**, 48 mg, 0.3 mmol), sodium

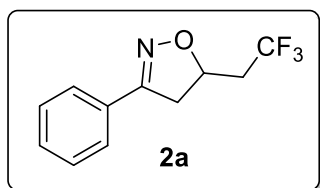

triflate (140 mg, 0.9 mmol). After 2.5 h, purification by column chromatography in 230-400 silica gel using 1.5% ethyl acetate in hexane yielded (**2a**, 47 mg, 68%) as a white solid. <sup>1</sup>H NMR (400 MHz, CDCl<sub>3</sub>) δ 7.71 – 7.63 (m, 2H), 7.48 – 7.39 (m, 3H), 5.03 –

4.95 (m, 1H), 3.57 (dd, *J* = 16.7, 10.3 Hz, 1H), 3.17 (dd, *J* = 16.7, 8.0 Hz, 1H), 2.80 – 2.67 (m, 1H), 2.51 – 2.38 (m, 1H). <sup>13</sup>C NMR{<sup>1</sup>H} (126 MHz, CDCl<sub>3</sub>) δ 156.7, 130.6, 129.1, 129.0, 126.9, 125.4 (q, *J* = 276.8 Hz), 74.9 (q, *J* = 3.0 Hz), 40.6, 39.3 (q, *J* = 27.8 Hz). <sup>19</sup>F NMR{<sup>1</sup>H} (471 MHz, CDCl<sub>3</sub>) δ -63.8. HRMS-ESI (*m/z*): calcd for C<sub>11</sub>H<sub>11</sub>F<sub>3</sub>NO [M + H]<sup>+</sup> 230.0793; found 230.0786.

### 3-(*p*-tolyl)-5-(2,2,2-trifluoroethyl)-4,5-dihydroisoxazole (**2b**):<sup>1</sup>

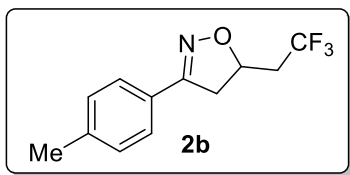

**GP 1** was followed using 1-(*p*-tolyl)but-3-en-1-one oxime (**1b**, 53 mg, 0.3 mmol), sodium triflinate (140 mg, 0.9 mmol). After 2.5 h, purification by column chromatography in 230-400 silica gel using 1.5% ethyl acetate in hexane yielded (**2b**, 52 mg, 72%) as a white solid. <sup>1</sup>H NMR (400 MHz, CDCl<sub>3</sub>) δ 7.56 (d, *J* = 8.2 Hz, 2H), 7.22 (d, *J* = 8.1 Hz, 2H), 5.01 – 4.93 (m, 1H), 3.54 (dd, *J* = 16.7, 10.2 Hz, 1H), 3.14 (dd, *J* = 16.7, 8.0 Hz, 1H), 2.79 – 2.66 (m, 1H), 2.48 – 2.34 (m, 1H), 2.39 (s, 3H). <sup>13</sup>C NMR{<sup>1</sup>H} (126 MHz, CDCl<sub>3</sub>) δ 156.7, 140.9, 129.7, 126.8, 126.3, 125.5 (q, *J* = 277.0 Hz), 74.8 (q, *J* = 3 Hz), 40.7, 39.3 (q, *J* = 27.7 Hz), 21.6. <sup>19</sup>F NMR{<sup>1</sup>H} (471 MHz, CDCl<sub>3</sub>) δ -63.8. HRMS-ESI (*m/z*): calcd for C<sub>12</sub>H<sub>13</sub>F<sub>3</sub>NO [*M* + *H*]<sup>+</sup> 244.0949; found 244.0953.

### 3-(4-ethylphenyl)-5-(2,2,2-trifluoroethyl)-4,5-dihydroisoxazole (**2c**):

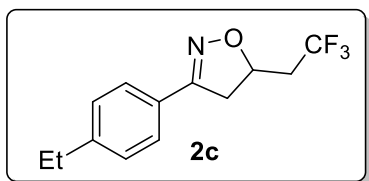

**GP 1** was followed using 1-(4-ethylphenyl)but-3-en-1-one oxime (**1c**, 57 mg, 0.3 mmol), sodium triflinate (140 mg, 0.9 mmol). After 2.5 h, purification by column chromatography in 230-400 silica gel using 1.5% ethyl acetate in hexane yielded (**2c**, 49 mg, 64%) as a white solid. <sup>1</sup>H NMR (400 MHz, CDCl<sub>3</sub>) δ 7.59 (d, *J* = 8.2 Hz, 2H), 7.25 (d, *J* = 8.2 Hz, 2H), 5.01 – 4.93 (m, 1H), 3.55 (dd, *J* = 16.7, 10.2 Hz, 1H), 3.15 (dd, *J* = 16.7, 7.9 Hz, 1H), 2.78 – 2.70 (m, 1H), 2.68 (q, *J* = 7.6 Hz, 2H), 2.54 – 2.35 (m, 1H), 1.25 (t, *J* = 7.6 Hz, 3H). <sup>13</sup>C NMR{<sup>1</sup>H} (126 MHz, CDCl<sub>3</sub>) δ 156.7, 147.2, 128.5, 126.9, 126.5, 125.4 (q, *J* = 277.1 Hz), 74.8 (q, *J* = 3.2 Hz), 40.7, 39.3 (q, *J* = 27.8 Hz), 28.9, 15.5. <sup>19</sup>F NMR{<sup>1</sup>H} (471 MHz, CDCl<sub>3</sub>) δ -63.8. HRMS-ESI (*m/z*): calcd for C<sub>13</sub>H<sub>15</sub>F<sub>3</sub>NO [*M* + *H*]<sup>+</sup> 258.1106; found 258.1093.

### 3-(4-(*tert*-butyl)phenyl)-5-(2,2,2-trifluoroethyl)-4,5-dihydroisoxazole (**2d**):

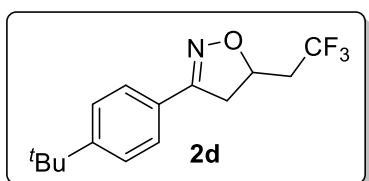

**GP 1** was followed using 1-(4-(*tert*-butyl)phenyl)but-3-en-1-one oxime (**1d**, 65 mg, 0.3 mmol), sodium triflinate (140 mg, 0.9 mmol). After 2.5 h, purification by column chromatography in 230-400 silica gel using 1.5% ethyl acetate in hexane yielded (**2d**, 54 mg, 63%) as a white solid. <sup>1</sup>H NMR (400 MHz, CDCl<sub>3</sub>) δ 7.61 (d, *J* = 8.4 Hz, 2H), 7.44 (d, *J* = 8.4 Hz, 2H), 4.99 – 4.95 (m, 1H),

3.55 (dd,  $J = 16.7, 10.2$  Hz, 1H), 3.15 (dd,  $J = 16.7, 7.9$  Hz, 1H), 2.88 – 2.59 (m, 1H), 2.60 – 2.18 (m, 1H), 1.34 (s, 9H).  $^{13}\text{C}$  NMR{ $^1\text{H}$ } (126 MHz,  $\text{CDCl}_3$ )  $\delta$  156.6, 154.1, 126.7, 126.2, 125.9, 125.5 (q,  $J = 276.8$  Hz), 74.8 (q,  $J = 3$  Hz), 40.7, 39.3 (q,  $J = 27.6$  Hz), 35.0, 31.3.  $^{19}\text{F}$  NMR{ $^1\text{H}$ } (471 MHz,  $\text{CDCl}_3$ )  $\delta$  -63.8. HRMS-ESI ( $m/z$ ): calcd for  $\text{C}_{15}\text{H}_{19}\text{F}_3\text{NO}$  [ $\text{M} + \text{H}$ ] $^+$  286.1419; found 286.1403.

### 3-(4-fluorophenyl)-5-(2,2,2-trifluoroethyl)-4,5-dihydroisoxazole (2e):

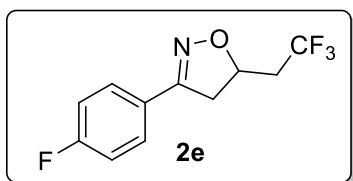

**GP 1** was followed using 1-(4-fluorophenyl)but-3-en-1-one oxime (**1e**, 54 mg, 0.3 mmol), sodium triflate (140 mg, 0.9 mmol). After 2.5 h, purification by column chromatography in 230-400 silica gel using 2% ethyl acetate in hexane yielded (**2e**, 55 mg, 74%) as a white solid.  $^1\text{H}$  NMR (400 MHz,  $\text{CDCl}_3$ )

$\delta$  7.82 – 7.44 (m, 2H), 7.20 – 6.90 (m, 2H), 5.03 – 4.95 (m, 1H), 3.54 (dd,  $J = 16.7, 10.3$  Hz, 1H), 3.14 (dd,  $J = 16.7, 8.0$  Hz, 1H), 2.81 – 2.63 (m, 1H), 2.57 – 2.31 (m, 1H).  $^{13}\text{C}$  NMR{ $^1\text{H}$ } (126 MHz,  $\text{CDCl}_3$ )  $\delta$  164.1 (d,  $J = 250.7$  Hz), 155.8, 128.9 (d,  $J = 7.6$  Hz), 125.4 (q,  $J = 278.5$  Hz), 125.4 (2,  $J = 2.5$  Hz), 116.2 (d,  $J = 22.7$  Hz), 75.1 (q,  $J = 2.5$  Hz), 40.6, 39.3 (q,  $J = 27.7$  Hz).  $^{19}\text{F}$  NMR{ $^1\text{H}$ } (471 MHz,  $\text{CDCl}_3$ )  $\delta$  -63.8, -109.3. HRMS-ESI ( $m/z$ ): calcd for  $\text{C}_{11}\text{H}_{10}\text{F}_4\text{NO}$  [ $\text{M} + \text{H}$ ] $^+$  248.0699; found 248.0696.

### 3-(4-bromophenyl)-5-(2,2,2-trifluoroethyl)-4,5-dihydroisoxazole (2f):

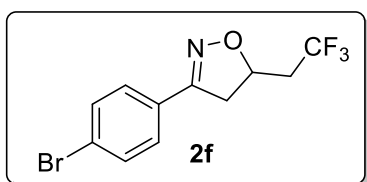

**GP 1** was followed using 1-(4-bromophenyl)but-3-en-1-one oxime (**1f**, 72 mg, 0.3 mmol), sodium triflate (140 mg, 0.9 mmol). After 2.5 h, purification by column chromatography in 230-400 silica gel using 1.5% ethyl acetate in hexane yielded (**2f**, 61 mg, 66%) as a white solid.  $^1\text{H}$  NMR (400 MHz,

$\text{CDCl}_3$ )  $\delta$  7.70 – 7.44 (m, 4H), 5.09 – 4.90 (m, 1H), 3.53 (dd,  $J = 16.8, 10.4$  Hz, 1H), 3.13 (dd,  $J = 16.8, 8.1$  Hz, 1H), 2.94 – 2.54 (m, 1H), 2.57 – 2.34 (m, 1H).  $^{13}\text{C}$  NMR{ $^1\text{H}$ } (126 MHz,  $\text{CDCl}_3$ )  $\delta$  155.9, 132.2, 128.3, 128.0, 125.4 (q,  $J = 277$  Hz), 124.9, 75.3 (q,  $J = 2.7$  Hz), 40.4, 39.2 (q,  $J = 28.5$  Hz).  $^{19}\text{F}$  NMR{ $^1\text{H}$ } (471 MHz,  $\text{CDCl}_3$ )  $\delta$  -63.8. HRMS-ESI ( $m/z$ ): calcd for  $\text{C}_{11}\text{H}_{10}\text{BrF}_3\text{NO}$  [ $\text{M} + \text{H}$ ] $^+$  307.9898; found 307.9892.

### 3-(4-chlorophenyl)-5-(2,2,2-trifluoroethyl)-4,5-dihydroisoxazole (2g):<sup>1</sup>

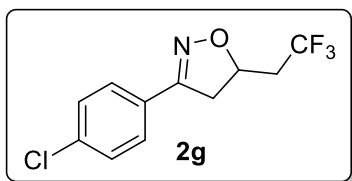

**GP 1** was followed using 1-(4-chlorophenyl)but-3-en-1-one oxime (**1g**, 59 mg, 0.3 mmol), sodium triflinate (140 mg, 0.9 mmol). After 2.5 h, purification by column chromatography in 230-400 silica gel using 2% ethyl acetate in hexane yielded (**2g**, 60 mg, 76%) as a white solid. <sup>1</sup>H NMR (500 MHz, CDCl<sub>3</sub>) δ 7.59 (d, *J* = 8.2 Hz, 2H), 7.38 (d, *J* = 8.2 Hz, 2H), 5.11 – 4.86 (m, 1H), 3.53 (dd, *J* = 16.7, 10.3 Hz, 1H), 3.13 (dd, *J* = 16.7, 8.1 Hz, 1H), 2.77 – 2.67 (m, 1H), 2.55 – 2.37 (m, 1H). <sup>13</sup>C NMR{<sup>1</sup>H} (126 MHz, CDCl<sub>3</sub>) δ 155.8, 136.6, 129.2, 128.1, 127.6, 126.4 (q, *J* = 279.1 Hz) 75.2 (q, *J* = 3 Hz), 40.4, 39.2 (q, *J* = 28 Hz). <sup>19</sup>F NMR{<sup>1</sup>H} (471 MHz, CDCl<sub>3</sub>) δ -63.9. HRMS-ESI (m/z): calcd for C<sub>11</sub>H<sub>10</sub>ClF<sub>3</sub>NO [M + H]<sup>+</sup> 264.0403; found 264.0397.

### 5-(2,2,2-trifluoroethyl)-3-(4-(trifluoromethyl)phenyl)-4,5-dihydroisoxazole (2h):<sup>3</sup>

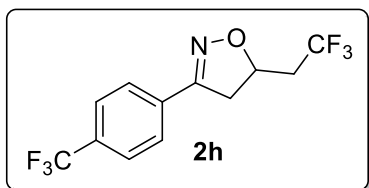

**GP 1** was followed using 1-(4-(trifluoromethyl)phenyl)but-3-en-1-one oxime (**1h**, 69 mg, 0.3 mmol), sodium triflinate (140 mg, 0.9 mmol). After 2.5 h, purification by column chromatography in 230-400 silica gel using 2.5% ethyl acetate in hexane yielded (**2h**, 55 mg, 62%) as a white solid. <sup>1</sup>H NMR (400 MHz, CDCl<sub>3</sub>) δ 7.78 (d, *J* = 8.3 Hz, 2H), 7.68 (d, *J* = 8.4 Hz, 2H), 5.08 – 5.00 (m, 1H), 3.58 (dd, *J* = 16.8, 10.4 Hz, 1H), 3.18 (dd, *J* = 16.8, 8.2 Hz, 1H), 2.85 – 2.64 (m, 1H), 2.60 – 2.36 (m, 1H). <sup>13</sup>C NMR{<sup>1</sup>H} (126 MHz, CDCl<sub>3</sub>) δ 155.7, 132.5, 132.3 (q, *J* = 32.8 Hz), 127.1, 126.0 (q, *J* = 3.8 Hz), 125.3 (q, *J* = 278.5 Hz), 123.9 (q, *J* = 273.4 Hz), 75.6 (q, *J* = 2.5 Hz), 40.2, 39.2 (q, *J* = 29 Hz). <sup>19</sup>F NMR{<sup>1</sup>H} (471 MHz, CDCl<sub>3</sub>) δ -63.0, -63.8. HRMS-ESI (m/z): calcd for C<sub>12</sub>H<sub>10</sub>F<sub>6</sub>NO [M + H]<sup>+</sup> 298.0667; found 298.0669.

### 3-(*m*-tolyl)-5-(2,2,2-trifluoroethyl)-4,5-dihydroisoxazole (2i):<sup>1</sup>

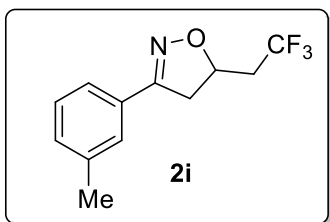

**GP 1** was followed using 1-(*m*-tolyl)but-3-en-1-one oxime (**1i**, 53 mg, 0.3 mmol), sodium triflinate (140 mg, 0.9 mmol). After 2.5 h, purification by column chromatography in 230-400 silica gel using 1.5% ethyl acetate in hexane yielded (**2i**, 47 mg, 65%) as solid. <sup>1</sup>H NMR (500 MHz, CDCl<sub>3</sub>) δ 7.51 (s, 1H), 7.45 (d, *J* = 7.6

Hz, 1H), 7.31 (t,  $J = 7.6$  Hz, 1H), 7.25 (d,  $J = 7.6$  Hz, 1H), 5.01–4.95 (m, 1H), 3.55 (dd,  $J = 16.7, 10.3$  Hz, 1H), 3.15 (dd,  $J = 16.7, 7.9$  Hz, 1H), 2.78–2.67 (m, 1H), 2.50 – 2.41 (m, 1H), 2.39 (s, 3H).  $^{13}\text{C}$  NMR{ $^1\text{H}$ } (126 MHz,  $\text{CDCl}_3$ )  $\delta$  156.8, 138.7, 131.4, 129.1, 128.9, 127.5, 125.5 (q,  $J = 277.2$  Hz), 124.1, 74.9 (q,  $J = 2.5$  Hz), 40.7, 39.3 (q,  $J = 28.9$  Hz), 21.5.  $^{19}\text{F}$  NMR{ $^1\text{H}$ } (471 MHz,  $\text{CDCl}_3$ )  $\delta$  -63.8.

### 3-(3-methoxyphenyl)-5-(2,2,2-trifluoroethyl)-4,5-dihydroisoxazole (2j):

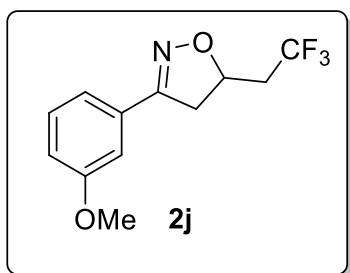

**GP 1** was followed using 1-(3-methoxyphenyl)but-3-en-1-one oxime (**1j**, 57 mg, 0.3 mmol), sodium triflate (140 mg, 0.9 mmol). After 2.5 h, purification by column chromatography in 230-400 silica gel using 5% ethyl acetate in hexane yielded (**2j**, 48 mg, 62%) as solid.  $^1\text{H}$  NMR (400 MHz,  $\text{CDCl}_3$ )  $\delta$  7.32 (t,  $J = 8.0$  Hz, 1H), 7.27 (s, 1H), 7.17 (d,  $J = 8.0$  Hz, 1H), 6.98 (dd,  $J = 8.1, 2.5$  Hz, 1H), 5.02-4.94 (m, 1H), 3.83 (s, 3H), 3.54 (dd,  $J = 16.7, 10.3$  Hz, 1H), 3.14 (dd,  $J = 16.7, 7.9$  Hz, 1H), 2.78-2.65 (m, 1H), 2.55 – 2.21 (m, 1H).  $^{13}\text{C}$  NMR{ $^1\text{H}$ } (126 MHz,  $\text{CDCl}_3$ )  $\delta$  159.9, 156.7, 130.3, 130.0, 125.4 (q,  $J = 277.2$  Hz), 119.5, 116.9, 111.5, 75.0 (q,  $J = 2.5$  Hz), 55.5 (q,  $J = 3.8$  Hz), 40.6, 39.3 (q,  $J = 27.7$  Hz).  $^{19}\text{F}$  NMR{ $^1\text{H}$ } (471 MHz,  $\text{CDCl}_3$ )  $\delta$  -63.8. HRMS-ESI (m/z): calcd for  $\text{C}_{12}\text{H}_{13}\text{F}_3\text{NO}_2$  [ $\text{M} + \text{H}$ ] $^+$  260.0898; found 260.0896.

### 5-(2,2,2-trifluoroethyl)-3-(3-(trifluoromethoxy)phenyl)-4,5-dihydroisoxazole (2k):

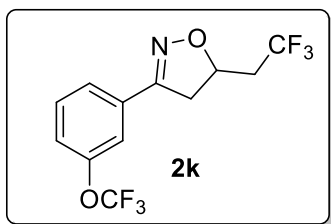

**GP 1** was followed using 1-(3-(trifluoromethoxy)phenyl)but-3-en-1-one oxime (**1k**, 73 mg, 0.3 mmol), sodium triflate (140 mg, 0.9 mmol). After 2.5 h, purification by column chromatography in 230-400 silica gel using 5% ethyl acetate in hexane yielded (**2k**, 53 mg, 57%) as solid.  $^1\text{H}$  NMR (400 MHz,  $\text{CDCl}_3$ )  $\delta$  7.58 (d,  $J = 7.8$  Hz, 1H), 7.54 (s, 1H), 7.46 (t,  $J = 8.0$  Hz, 1H), 7.29 (d,  $J = 8.2$  Hz, 1H), 5.07–4.99 (m, 1H), 3.55 (dd,  $J = 16.8, 10.4$  Hz, 1H), 3.15 (dd,  $J = 16.8, 8.1$  Hz, 1H), 2.76–2.71 (m, 1H), 2.60 – 2.30 (m, 1H).  $^{13}\text{C}$  NMR{ $^1\text{H}$ } (126 MHz,  $\text{CDCl}_3$ )  $\delta$  155.7, 149.7, 131.2, 130.5, 125.3 (q,  $J = 277.2$  Hz), 125.2, 122.9, 120.6 (q,  $J = 257$  Hz), 119.3, 75.4 (q,  $J = 2.5$  Hz), 40.3, 39.2 (q,  $J = 28.9$  Hz).  $^{19}\text{F}$  NMR{ $^1\text{H}$ } (471 MHz,  $\text{CDCl}_3$ )  $\delta$  -57.9, -63.8. HRMS-ESI (m/z): calcd for  $\text{C}_{12}\text{H}_9\text{F}_6\text{NNaO}_2$  [ $\text{M} + \text{Na}$ ] $^+$  336.0435; found 336.0410.

### 3-(3-fluorophenyl)-5-(2,2,2-trifluoroethyl)-4,5-dihydroisoxazole (2l):

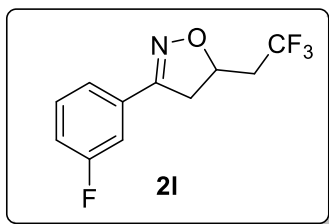

**GP 1** was followed using 1-(3-fluorophenyl)but-3-en-1-one oxime (**1l**, 74 mg, 0.3 mmol), sodium triflate (140 mg, 0.9 mmol). After 2.5 h, purification by column chromatography in 230-400 silica gel using 2% ethyl acetate in hexane yielded (**2l**, 51 mg, 70%) as solid.  $^1\text{H NMR}$  (400 MHz,  $\text{CDCl}_3$ )  $\delta$  7.47 – 7.31 (m, 3H), 7.19 – 7.07 (m, 1H), 5.05 – 4.97 (m, 1H), 3.54 (dd,  $J = 16.8, 10.4$  Hz, 1H), 3.14 (dd,  $J = 16.7, 8.1$  Hz, 1H), 2.86 – 2.64 (m, 1H), 2.59 – 2.29 (m, 1H).  $^{13}\text{C NMR}\{^1\text{H}\}$  (126 MHz,  $\text{CDCl}_3$ )  $\delta$  162.9 (d,  $J = 246.9$  Hz), 155.9 (d,  $J = 2.5$  Hz), 131.2 (d,  $J = 7.5$  Hz), 130.6 (d,  $J = 8.8$  Hz), 125.3 (q,  $J = 278.4$  Hz), 122.6 (d,  $J = 2.5$  Hz), 117.6 (d,  $J = 21.42$  Hz), 113.8 (d,  $J = 23.9$  Hz), 75.3 (q,  $J = 3.8$  Hz), 40.4, 39.2 (q,  $J = 27.7$  Hz).  $^{19}\text{F NMR}\{^1\text{H}\}$  (471 MHz,  $\text{CDCl}_3$ )  $\delta$  -63.9, -111.9. HRMS-ESI ( $m/z$ ): calcd for  $\text{C}_{11}\text{H}_{10}\text{F}_4\text{NO}$  [ $\text{M} + \text{H}$ ] $^+$  248.0699; found 248.0683.

### 3-(3-bromophenyl)-5-(2,2,2-trifluoroethyl)-4,5-dihydroisoxazole (2m):

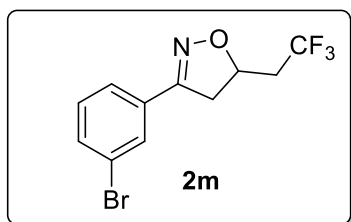

**GP 1** was followed using 1-(3-bromophenyl)but-3-en-1-one oxime (**1m**, 72 mg, 0.3 mmol), sodium triflate (140 mg, 0.9 mmol). After 2.5 h, purification by column chromatography in 230-400 silica gel using 2% ethyl acetate in hexane yielded (**2m**, 59 mg, 64%) as a semi solid.  $^1\text{H NMR}$  (400 MHz,  $\text{CDCl}_3$ )  $\delta$  7.80 (s, 1H), 7.60 (d,  $J = 7.8$  Hz, 1H), 7.56 (d,  $J = 7.9$  Hz, 1H), 7.29 (t,  $J = 7.9$  Hz, 1H), 5.05 – 4.97 (m, 1H), 3.53 (dd,  $J = 16.8, 10.4$  Hz, 1H), 3.13 (dd,  $J = 16.8, 8.1$  Hz, 1H), 2.79 – 2.67 (m,  $J = 21.3, 10.8, 5.5$  Hz, 1H), 2.60 – 2.31 (m, 1H).  $^{13}\text{C NMR}\{^1\text{H}\}$  (126 MHz,  $\text{CDCl}_3$ )  $\delta$  155.6, 133.5, 131.1, 130.5, 129.8, 125.4 (q,  $J = 277.2$  Hz), 125.4, 123.1, 75.3 (q,  $J = 3.8$  Hz), 40.3, 39.2 (q,  $J = 27.7$  Hz).  $^{19}\text{F NMR}\{^1\text{H}\}$  (471 MHz,  $\text{CDCl}_3$ )  $\delta$  -63.8. HRMS-ESI ( $m/z$ ): calcd for  $\text{C}_{11}\text{H}_{10}\text{BrF}_3\text{NO}$  [ $\text{M} + \text{H}$ ] $^+$  307.9898; found 307.9891.

### 3-(*o*-tolyl)-5-(2,2,2-trifluoroethyl)-4,5-dihydroisoxazole (2n):<sup>3</sup>

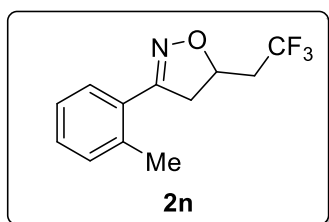

**GP 1** was followed using 1-(*o*-tolyl)but-3-en-1-one oxime (**1n**, 53 mg, 0.3 mmol), sodium triflate (140 mg, 0.9 mmol). After 2.5 h, purification by column chromatography in 230-400 silica gel using 1.5% ethyl acetate in hexane yielded (**2n**, 51 mg, 70%) as solid.  $^1\text{H NMR}$  (500 MHz,  $\text{CDCl}_3$ )  $\delta$  7.27 – 7.21 (m, 2H), 7.20 –

7.16 (m, 2H), 4.87 (m, 1H), 3.53 (dd,  $J = 16.6, 10.2$  Hz, 1H), 3.14 (dd,  $J = 16.7, 8.0$  Hz, 1H), 2.81 – 2.56 (m, 1H), 2.49 (s, 3H), 2.45 – 2.29 (m, 1H).  $^{13}\text{C NMR}\{^1\text{H}\}$  (126 MHz,  $\text{CDCl}_3$ )  $\delta$  157.6, 138.3, 131.9, 129.8, 129.0, 128.2, 126.1, 125.5 (q,  $J = 277.4$  Hz), 73.9 (q,  $J = 3.0$  Hz), 43.1, 39.2 (q,  $J = 27.8$  Hz), 23.1.  $^{19}\text{F NMR}\{^1\text{H}\}$  (471 MHz,  $\text{CDCl}_3$ )  $\delta$  -63.8.

### 3-(4-bromo-2-fluorophenyl)-5-(2,2,2-trifluoroethyl)-4,5-dihydroisoxazole (2o):

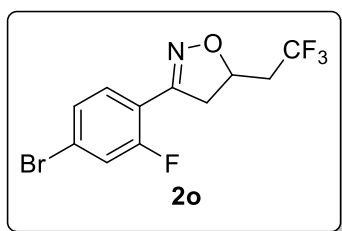

**GP 1** was followed using 1-(4-bromo-2-fluorophenyl)but-3-en-1-one oxime (**1o**, 78 mg, 0.3 mmol), sodium triflinate (140 mg, 0.9 mmol). After 2.5 h, purification by column chromatography in 230-400 silica gel using 5% ethyl acetate in hexane yielded (**2o**, 74 mg, 76%) as solid.  $^1\text{H NMR}$  (400 MHz,  $\text{CDCl}_3$ )  $\delta$  7.80 – 7.67 (m, 1H), 7.34 – 7.26 (m, 2H), 5.03 – 4.95 (m, 1H), 3.62 (dd,  $J = 17.4, 10.4$  Hz, 1H), 3.22 (dd,  $J = 17.5, 8.1$  Hz, 1H), 2.84 – 2.57 (m, 1H), 2.60 – 2.30 (m, 1H).  $^{13}\text{C NMR}\{^1\text{H}\}$  (126 MHz,  $\text{CDCl}_3$ )  $\delta$  160.1 (d,  $J = 256.9$  Hz), 152.8 (d,  $J = 3.3$  Hz), 130.0 (d,  $J = 3.7$  Hz), 128.3 (d,  $J = 3.2$  Hz), 125.3 (q,  $J = 277.4$  Hz), 125.1 (d,  $J = 9.6$  Hz), 120.3 (d,  $J = 25.3$  Hz), 116.4 (d,  $J = 11.6$  Hz), 75.5 – 75.3 (m), 42.0 (d,  $J = 7.2$  Hz), 39.2 (q,  $J = 28.0$  Hz).  $^{19}\text{F NMR}\{^1\text{H}\}$  (471 MHz,  $\text{CDCl}_3$ )  $\delta$  -63.9, -110.6. HRMS-ESI ( $m/z$ ): calcd for  $\text{C}_{11}\text{H}_9\text{BrF}_4\text{NO}$  [ $\text{M} + \text{H}$ ] $^+$  325.9804; found 325.9790.

### 3-(naphthalen-2-yl)-5-(2,2,2-trifluoroethyl)-4,5-dihydroisoxazole (2p):<sup>3</sup>

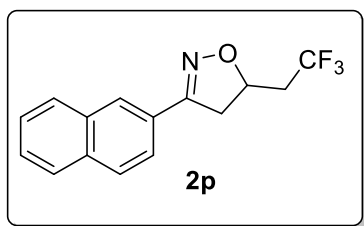

**GP 1** was followed using 1-(naphthalen-2-yl)but-3-en-1-one oxime (**1p**, 63 mg, 0.3 mmol), sodium triflinate (140 mg, 0.9 mmol). After 2.5 h, purification by column chromatography in 230-400 silica gel using 3% ethyl acetate in hexane yielded (**2p**, 40 mg, 53%) as solid.  $^1\text{H NMR}$  (400 MHz,  $\text{CDCl}_3$ )  $\delta$  7.98 – 7.95 (m, 1H), 7.89 – 7.83 (m, 4H), 7.62 – 7.49 (m, 2H), 5.18 – 4.92 (m, 1H), 3.69 (dd,  $J = 16.6, 10.2$  Hz, 1H), 3.30 (dd,  $J = 16.6, 8.0$  Hz, 1H), 2.97 – 2.64 (m, 1H), 2.63 – 2.34 (m, 1H).  $^{13}\text{C NMR}\{^1\text{H}\}$  (126 MHz,  $\text{CDCl}_3$ )  $\delta$  156.9, 134.3, 133.1, 128.9, 128.6, 128.0, 127.5, 127.3, 127.0, 126.7, 125.5 (d,  $J = 262.8$  Hz), 123.6, 75.1 (q,  $J = 3.0$  Hz), 40.6, 39.4 (q,  $J = 27.8$  Hz).  $^{19}\text{F NMR}\{^1\text{H}\}$  (471 MHz,  $\text{CDCl}_3$ )  $\delta$  -63.9, -110.6.

### 3-(thiophen-2-yl)-5-(2,2,2-trifluoroethyl)-4,5-dihydroisoxazole (**2q**):<sup>3</sup>

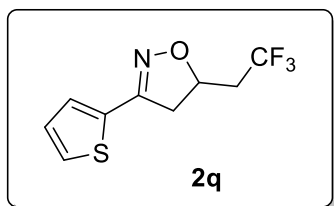

**GP 1** was followed using 1-(thiophen-2-yl)but-3-en-1-one oxime (**1q**, 50 mg, 0.3 mmol), sodium triflinate (140 mg, 0.9 mmol). After 2.5 h, purification by column chromatography in 230-400 silica gel using 2% ethyl acetate in hexane yielded (**2q**, 50 mg, 69%) as solid. <sup>1</sup>H NMR (400 MHz, CDCl<sub>3</sub>) δ 7.42 (dd, *J* = 4.9, 0.9 Hz, 1H), 7.22 (dd, *J* = 3.7, 0.9 Hz, 1H), 7.08 (dd, *J* = 5.0, 3.7 Hz, 1H), 5.13 – 4.88 (m, 1H), 3.57 (dd, *J* = 16.4, 10.3 Hz, 1H), 3.18 (dd, *J* = 16.5, 8.0 Hz, 1H), 2.80 – 2.67 (m, 1H), 2.51 – 2.37 (m, 1H). <sup>13</sup>C NMR{<sup>1</sup>H} (126 MHz, CDCl<sub>3</sub>) δ 152.5, 131.5, 128.9, 128.9, 127.5, 125.4 (d, *J* = 277.0 Hz), 75.2 (q, *J* = 3.0 Hz), 41.4, 39.2 (q, *J* = 27.8 Hz). <sup>19</sup>F NMR{<sup>1</sup>H} (471 MHz, CDCl<sub>3</sub>) δ -63.8.

### 3,5-diphenyl-5-(2,2,2-trifluoroethyl)-4,5-dihydroisoxazole (**2r**):<sup>5</sup>

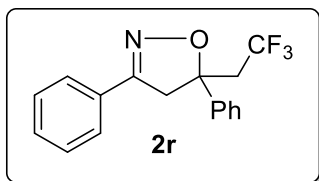

**GP 1** was followed using 1,3-diphenylbut-3-en-1-one oxime (**1r**, 71 mg, 0.3 mmol), sodium triflinate (140 mg, 0.9 mmol). After 2.5 h, purification by column chromatography in 230-400 silica gel using 1.5% ethyl acetate in hexane yielded (**2r**, 78 mg, 85%) as solid. <sup>1</sup>H NMR (500 MHz, CDCl<sub>3</sub>) δ 7.68 – 7.64 (m, 2H), 7.51 (d, *J* = 7.7 Hz, 2H), 7.44 – 7.37 (m, 5H), 7.36 – 7.29 (m, 1H), 3.80 (d, *J* = 16.7 Hz, 1H), 3.67 (d, *J* = 16.7 Hz, 1H), 2.96 – 2.90 (m, 2H). <sup>13</sup>C NMR{<sup>1</sup>H} (126 MHz, CDCl<sub>3</sub>) δ 156.6, 142.7, 130.5, 129.2, 128.9, 128.8, 128.3, 126.8, 125.1, δ 125.0 (q, *J* = 278.4 Hz), 86.5 (q, *J* = 1.9 Hz), 46.7 (d, *J* = 1.6 Hz), 44.3 (q, *J* = 27.3 Hz). <sup>19</sup>F NMR{<sup>1</sup>H} (471 MHz, CDCl<sub>3</sub>) δ -60.5.

### 5-phenyl-3-(*p*-tolyl)-5-(2,2,2-trifluoroethyl)-4,5-dihydroisoxazole (**2s**):<sup>5</sup>

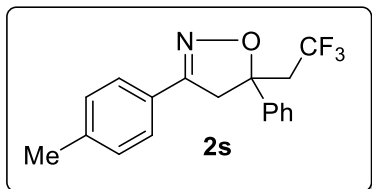

**GP 1** was followed using 3-phenyl-1-(*p*-tolyl)but-3-en-1-one oxime (**1s**, 75 mg, 0.3 mmol), sodium triflinate (140 mg, 0.9 mmol). After 2.5 h, purification by column chromatography in 230-400 silica gel using 1.5% ethyl acetate in hexane yielded (**2s**, 84 mg, 88%) as solid. <sup>1</sup>H NMR (500 MHz, CDCl<sub>3</sub>) δ 7.55 (d, *J* = 8.2 Hz, 2H), 7.51 (d, *J* = 7.4 Hz, 2H), 7.39 (t, *J* = 7.7 Hz, 2H), 7.34 – 7.29 (m, 1H), 7.20 (d, *J* = 8.0 Hz, 2H), 3.77 (d, *J* = 16.7 Hz, 1H), 3.65 (d, *J* = 16.7 Hz, 1H), 2.92 (qd, *J* = 10.3, 0.9 Hz, 2H), 2.37 (s, 3H). <sup>13</sup>C NMR{<sup>1</sup>H} (126 MHz, CDCl<sub>3</sub>) δ 156.5, 142.7, 140.9,

129.6, 128.8, 128.2, 126.8, 126.4, 125.2,  $\delta$  125.0 (q,  $J$  = 276.1 Hz), 86.2 (q,  $J$  = 2.0 Hz), 46.8 (d,  $J$  = 1.5 Hz), 44.3 (q,  $J$  = 27.2 Hz), 21.6.  $^{19}\text{F}$  NMR{ $^1\text{H}$ } (471 MHz,  $\text{CDCl}_3$ )  $\delta$  -60.4.

### 3-phenyl-5-(*p*-tolyl)-5-(2,2,2-trifluoroethyl)-4,5-dihydroisoxazole (**2t**):<sup>5</sup>

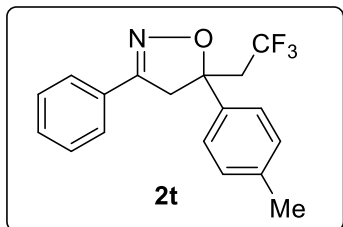

**GP 1** was followed using 1-phenyl-3-(*p*-tolyl)but-3-en-1-one oxime (**1t**, 75 mg, 0.3 mmol), sodium triflate (140 mg, 0.9 mmol). After 2.5 h, purification by column chromatography in 230-400 silica gel using 1.5% ethyl acetate in hexane yielded (**2t**, 86 mg, 89%) as solid.  $^1\text{H}$  NMR (500 MHz,  $\text{CDCl}_3$ )  $\delta$  7.67 (d,  $J$  = 7.6 Hz, 2H), 7.41 – 7.40 (m, 5H), 7.23 (t,  $J$  = 14.4 Hz, 2H), 3.78 (d,  $J$  = 16.7 Hz, 1H), 3.66 (d,  $J$  = 16.7 Hz, 1H), 2.93 (q,  $J$  = 10.4 Hz, 2H), 2.36 (s, 3H).  $^{13}\text{C}$  NMR{ $^1\text{H}$ } (126 MHz,  $\text{CDCl}_3$ )  $\delta$  156.6, 139.7, 138.0, 130.5, 129.4, 129.3, 128.9, 126.8, 125.0, 125.0 (q,  $J$  = 278.4 Hz), 86.4 (d,  $J$  = 1.9 Hz), 46.6, 44.3 (q,  $J$  = 27.2), 21.1.  $^{19}\text{F}$  NMR{ $^1\text{H}$ } (471 MHz,  $\text{CDCl}_3$ )  $\delta$  -60.4.

### 5-(4-fluorophenyl)-3-phenyl-5-(2,2,2-trifluoroethyl)-4,5-dihydroisoxazole (**2u**):<sup>5</sup>

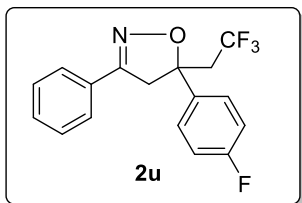

**GP 1** was followed using 3-(4-fluorophenyl)-1-phenylbut-3-en-1-one oxime (**1u**, 77 mg, 0.2 mmol), sodium triflate (140 mg, 0.9 mmol). After 2.5 h, purification by column chromatography in 230-400 silica gel using 1.5% ethyl acetate in hexane yielded (**2u**, 89 mg, 92%) as solid.  $^1\text{H}$  NMR (500 MHz,  $\text{CDCl}_3$ )  $\delta$  7.69 – 7.60 (m, 2H), 7.54 – 7.45 (m, 2H), 7.45 – 7.36 (m, 3H), 7.11 – 7.03 (m, 2H), 3.79 (d,  $J$  = 16.7 Hz, 1H), 3.64 (d,  $J$  = 16.7 Hz, 1H), 3.03 – 2.75 (m, 2H).  $^{13}\text{C}$  NMR{ $^1\text{H}$ } (126 MHz,  $\text{CDCl}_3$ )  $\delta$  162.5 (d,  $J$  = 247.3 Hz), 156.6, 138.3 (d,  $J$  = 3.1 Hz), 130.6, 129.0, 128.9, 127.1 (d,  $J$  = 8.3 Hz), 126.8, 124.9 (q,  $J$  = 278.3 Hz), 115.7 (d,  $J$  = 21.7 Hz), 86.1 (d,  $J$  = 1.9 Hz), 46.9, 44.4 (q,  $J$  = 27.2 Hz).  $^{19}\text{F}$  NMR{ $^1\text{H}$ } (471 MHz,  $\text{CDCl}_3$ )  $\delta$  -60.4, -114.0.

### 5-methyl-3-phenyl-5-(2,2,2-trifluoroethyl)-4,5-dihydroisoxazole (**2v**):<sup>1</sup>

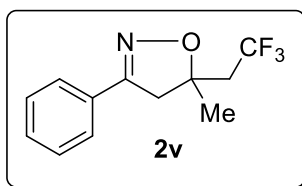

**GP 1** was followed using 3-methyl-1-phenylbut-3-en-1-one oxime (**1v**, 53 mg, 0.3 mmol), sodium triflate (140 mg, 0.9 mmol). After 2.5 h, purification by column chromatography in 230-400 silica gel using 0.5% ethyl acetate in hexane yielded (**2v**, 67 mg, 92%) as solid.  $^1\text{H}$  NMR (500 MHz,  $\text{CDCl}_3$ )  $\delta$  7.71 – 7.58 (m, 2H), 7.48 –

7.34 (m, 3H), 3.40 (d,  $J = 16.8$  Hz, 1H), 3.17 (d,  $J = 16.8$  Hz, 1H), 2.68 – 2.59 (m, 2H), 1.58 (s, 3H).  $^{13}\text{C}$  NMR $\{^1\text{H}\}$  (126 MHz,  $\text{CDCl}_3$ )  $\delta$  156.7, 130.4, 129.6, 128.9, 126.7, 125.4 (q,  $J = 277.5$  Hz), 83.4 (q,  $J = 1.9$  Hz), 45.8 (d,  $J = 1.7$  Hz), 43.1 (q,  $J = 27.4$  Hz), 25.7 (d,  $J = 1.7$  Hz).  $^{19}\text{F}$  NMR $\{^1\text{H}\}$  (471 MHz,  $\text{CDCl}_3$ )  $\delta$  -61.4.

### 3-phenethyl-5-phenyl-5-(2,2,2-trifluoroethyl)-4,5-dihydroisoxazole (2w):

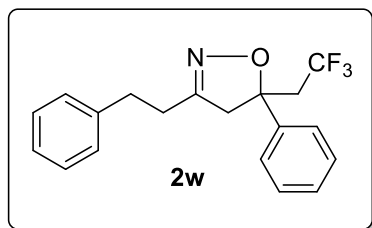

**GP 1** was followed using 1,5-diphenylhex-5-en-3-one oxime (**1w**, 79 mg, 0.3 mmol), sodium triflate (140 mg, 0.9 mmol). After 2.5 h, purification by column chromatography in 230-400 silica gel using 0.75% ethyl acetate in hexane yielded (**2w**, 65 mg, 63%) as solid.  $^1\text{H}$  NMR (500 MHz,  $\text{CDCl}_3$ )  $\delta$  7.44 – 7.37 (m, 5H), 7.35 – 7.33 (m, 1H), 7.29 – 7.28 (m, 2H), 7.15 (d,  $J = 7.1$  Hz, 2H), 3.32 (d,  $J = 17.1$  Hz, 1H), 3.16 (d,  $J = 17.0$  Hz, 1H), 2.90 (td,  $J = 8.0, 3.7$  Hz, 2H), 2.78 (qd,  $J = 10.3, 2.1$  Hz, 2H), 2.67 (t,  $J = 7.9$  Hz, 2H).  $^{13}\text{C}$  NMR (126 MHz,  $\text{CDCl}_3$ )  $\delta$  158.4, 142.9, 140.3, 128.7, 128.7, 128.4, 128.1, 126.5, 125.1, 125.0 (q,  $J = 278.0$  Hz), 85.3 (q,  $J = 2.3$  Hz), 48.9 (q,  $J = 2.2$  Hz), 44.1 (q,  $J = 27.1$  Hz), 32.7, 29.6.  $^{19}\text{F}$  NMR $\{^1\text{H}\}$  (471 MHz,  $\text{CDCl}_3$ )  $\delta$  -60.6. HRMS-ESI ( $m/z$ ): calcd for  $\text{C}_{19}\text{H}_{19}\text{F}_3\text{NO}$  [ $\text{M} + \text{H}$ ] $^+$  334.1419; found 334.1414.

### 3-isopropyl-5-phenyl-5-(2,2,2-trifluoroethyl)-4,5-dihydroisoxazole (2x):

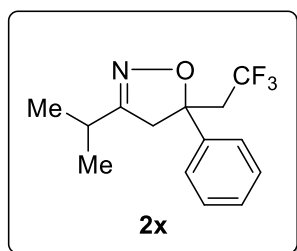

**GP 1** was followed using 2-methyl-5-phenylhex-5-en-3-one oxime (**1x**, 60 mg, 0.3 mmol), sodium triflate (140 mg, 0.9 mmol). After 2.5 h, purification by column chromatography in 230-400 silica gel using 0.75% ethyl acetate in hexane yielded (**2x**, 66 mg, 82%) as solid.  $^1\text{H}$  NMR (500 MHz,  $\text{CDCl}_3$ )  $\delta$  7.43 (d,  $J = 7.2$  Hz, 2H), 7.37 (t,  $J = 7.6$  Hz, 2H), 7.30 (t,  $J = 7.9$  Hz, 1H), 3.38 (d,  $J = 16.9$  Hz, 1H), 3.22 (d,  $J = 17.0$  Hz, 1H), 2.80 (q,  $J = 10.6$  Hz, 2H), 2.69 (h,  $J = 7.5$  Hz, 1H), 1.16 (d,  $J = 6.9$  Hz, 3H), 1.13 (d,  $J = 6.9$  Hz, 3H).  $^{13}\text{C}$  NMR (126 MHz,  $\text{CDCl}_3$ )  $\delta$  163.6, 143.1, 128.7, 128.0, 125.1, 125.1 (q,  $J = 278.2$  Hz), 85.1 (q,  $J = 2.0$  Hz), 46.6, 44.3 (q,  $J = 26.9$  Hz), 28.1, 20.1, 20.0.  $^{19}\text{F}$  NMR $\{^1\text{H}\}$  (471 MHz,  $\text{CDCl}_3$ )  $\delta$  -60.6. HRMS-ESI ( $m/z$ ): calcd for  $\text{C}_{14}\text{H}_{17}\text{F}_3\text{NO}$  [ $\text{M} + \text{H}$ ] $^+$  272.1262; found 272.1268.

### 1-(4-bromo-2-fluorophenyl)-5,5,5-trifluoro-3-hydroxypentan-1-one (3):

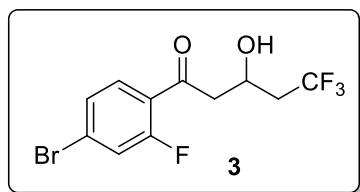

$^1\text{H NMR}$  (400 MHz,  $\text{CDCl}_3$ )  $\delta$  7.79 (t,  $J = 8.2$  Hz, 1H), 7.40 (ddd,  $J = 12.3, 9.5, 1.7$  Hz, 2H), 4.71 – 4.49 (m, 1H), 3.26 – 3.16 (m, 2H), 2.59 – 2.42 (m, 1H), 2.42 – 2.25 (m, 1H), 1.63 (s, 1H).  $^{13}\text{C NMR}\{^1\text{H}\}$  (126 MHz,  $\text{CDCl}_3$ )  $\delta$  196.4 (d,  $J = 4.4$  Hz), 162.0 (d,  $J = 259.8$  Hz), 131.7 (d,  $J = 3.0$  Hz), 129.4 (d,  $J = 10.0$  Hz), 128.5 (d,  $J = 3.4$  Hz), 126.1 (q,  $J = 276.9$  Hz), 123.8 (d,  $J = 12.5$  Hz), 120.7 (d,  $J = 27.1$  Hz), 63.0 – 61.6 (m), 49.7 (d,  $J = 7.6$  Hz), 40.3 (q,  $J = 27.6$  Hz).  $^{19}\text{F NMR}\{^1\text{H}\}$  (471 MHz,  $\text{CDCl}_3$ )  $\delta$  -63.42, -106.38. HRMS-ESI ( $m/z$ ): calcd for  $\text{C}_{11}\text{H}_{10}\text{BrF}_4\text{O}_2$   $[\text{M} + \text{H}]^+$  328.9800; found 328.9787.

### 3-(3-fluoro-4'-methyl-[1,1'-biphenyl]-4-yl)-5-(2,2,2-trifluoroethyl)-4,5-dihydroisoxazole (4):

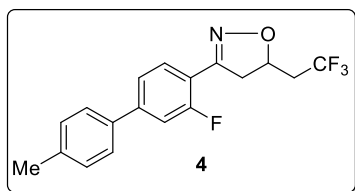

$^1\text{H NMR}$  (500 MHz,  $\text{CDCl}_3$ )  $\delta$  7.90 (t,  $J = 8.0$  Hz, 1H), 7.50 (d,  $J = 8.2$  Hz, 2H), 7.42 (dd,  $J = 8.2, 1.8$  Hz, 1H), 7.34 (dd,  $J = 12.7, 1.7$  Hz, 1H), 7.27 (d,  $J = 7.9$  Hz, 2H), 5.08 – 4.91 (m, 1H), 3.67 (ddd,  $J = 17.4, 10.3, 2.2$  Hz, 1H), 3.27 (ddd,  $J = 17.4, 8.1, 1.8$  Hz, 1H), 2.73 (dq,  $J = 21.2, 10.6, 5.7$  Hz, 1H), 2.52 – 2.42 (m, 1H), 2.41 (s, 3H).  $^{13}\text{C NMR}\{^1\text{H}\}$  (126 MHz,  $\text{CDCl}_3$ )  $\delta$  160.8 (d,  $J = 252.1$  Hz), 153.4 (d,  $J = 3.2$  Hz), 145.5 (d,  $J = 8.5$  Hz), 138.7, 136.0 (d,  $J = 1.9$  Hz), 129.3 (d,  $J = 3.6$  Hz), 129.0, 126.9, 125.4 (q,  $J = 277.1$  Hz), 123.0 (d,  $J = 2.8$  Hz), 115.5 (d,  $J = 11.9$  Hz), 114.6 (d,  $J = 23.0$  Hz), 75.3 – 75.0 (m), 42.3 (d,  $J = 7.1$  Hz), 39.3 (q,  $J = 27.9$  Hz), 21.3.  $^{19}\text{F NMR}\{^1\text{H}\}$  (471 MHz,  $\text{CDCl}_3$ )  $\delta$  -63.8, -112.7. HRMS-ESI ( $m/z$ ): calcd for  $\text{C}_{18}\text{H}_{16}\text{F}_4\text{NO}$   $[\text{M} + \text{H}]^+$  338.1163; found 338.1152.

### Mechanistic Studies:

#### a) Electrochemical trifluoromethylation under argon atmosphere:

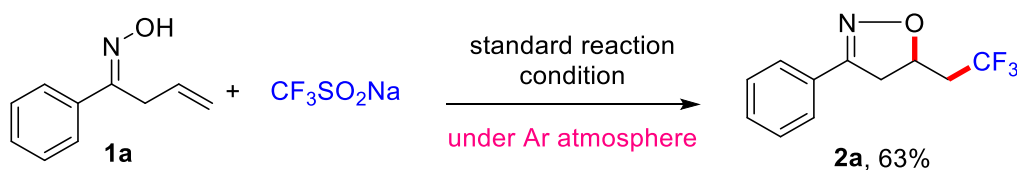

1-phenylbut-3-en-1-one oxime (**1a**, 48 mg, 0.3 mmol), sodium triflate (140 mg, 0.9 mmol), and lithium perchlorate (64 mg, 0.1 M) were taken in a dry undivided cell and dissolved in 6 mL of MeCN/H<sub>2</sub>O (40:1). The cell was equipped with graphite (5.2 cm×0.8 cm×0.2 cm) both as cathode and an anode. Thereafter the reaction mixture was stirred and electrolyzed at a constant current of 10 mA under argon atmosphere and room temperature for 2.5 h. After the completion of the reaction, the reaction mixture was concentrated under vacuum and purification was performed by column chromatography in 230-400 silica gel using 1.5% ethyl acetate in hexane to deliver (**2a**, 43 mg, 63%) as a white solid.

### b) Divided cell electrolysis at anode:

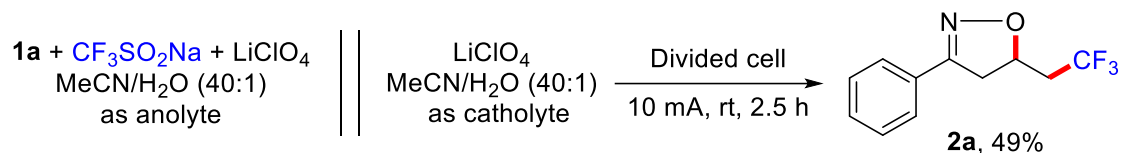

1-phenylbut-3-en-1-one oxime (**1a**, 48 mg, 0.3 mmol), sodium triflate (140 mg, 0.9 mmol), and lithium perchlorate (32 mg, 0.1 M) in 3 mL of MeCN/H<sub>2</sub>O (40:1) were taken in the anodic chamber of a dry divided cell (separated by G3 sintered). Lithium perchlorate (32 mg, 0.1 M) and 3 mL of MeCN/H<sub>2</sub>O (40:1) were taken in the cathodic chamber of the cell. The cell was equipped with graphite (5.2 cm × 0.8 cm × 0.2 cm) electrodes both as anode and cathode. Thereafter, the reaction mixture was continuously stirred and electrolyzed with an AXIOMET AX-3003P power supply of 10 mA under air atmosphere and room temperature for 2.5 h. After the completion of the reaction, the reaction mixture was concentrated under vacuum and purification by column chromatography in 230-400 silica gel using 1.5% ethyl acetate in hexane yielded **2a** (34 mg, 49%) as a white solid.

### c) Divided cell electrolysis at cathode:

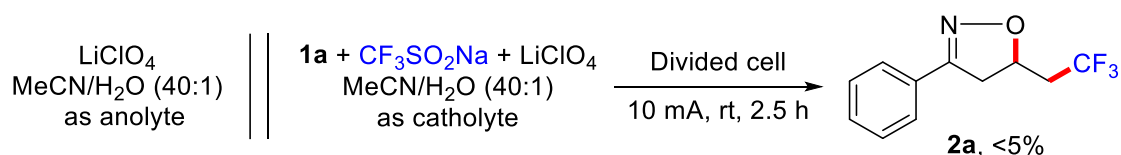

1-phenylbut-3-en-1-one oxime (**1a**, 48 mg, 0.3 mmol), sodium triflate (140 mg, 0.9 mmol), and lithium perchlorate (32 mg, 0.1 M) in 3 mL of MeCN/H<sub>2</sub>O (40:1) were taken in the cathodic chamber of a dry divided cell (separated by G3 sintered). Lithium perchlorate (32 mg, 0.1 M)

and 3 mL of MeCN/H<sub>2</sub>O (40:1) were taken in the anodic chamber of the cell. The cell was equipped with graphite (5.2 cm × 0.8 cm × 0.2 cm) electrodes both as anode and cathode. Thereafter, the reaction mixture was continuously stirred and electrolyzed with an AXIOMET AX-3003P power supply of 10 mA under air atmosphere and room temperature for 2.5 h. After 2.5 h, solvent was evaporated and the crude mixture was analyzed using <sup>1</sup>H NMR, where **2a** was not detected.

#### d) Control experiments involving **5**:

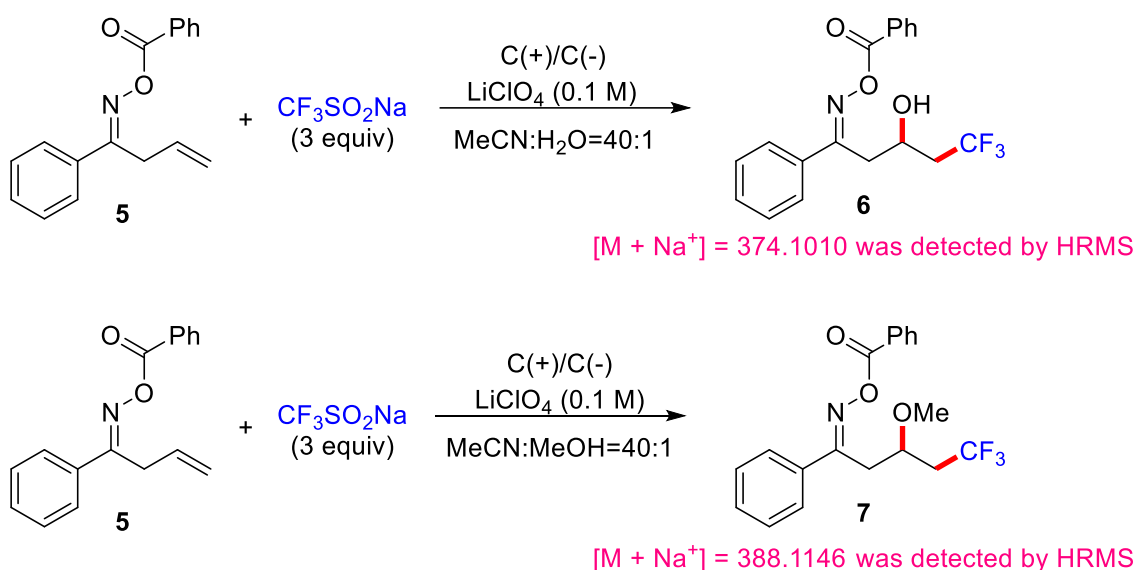

1-phenylbut-3-en-1-one *O*-benzoyl oxime (**5**, 79 mg, 0.3 mmol), sodium triflinate (140 mg, 0.9 mmol), and lithium perchlorate (64 mg, 0.1 M), were taken in an undivided cell and dissolved in 6 mL of MeCN/H<sub>2</sub>O (40:1) or MeCN/MeOH (40:1). The cell was equipped with graphite (5.2 cm×0.8 cm×0.2 cm) both as cathode and anode. Thereafter the reaction mixture was stirred and electrolyzed at a constant current of 10 mA under air atmosphere and room temperature. After 2.5 h, HRMS measurement confirms the formation of **6** and **7** respectively and **2a** was not observed.

#### e) Control experiments involving **1a** and **1r**:

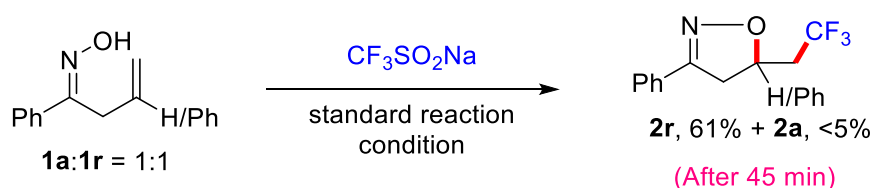

1-phenylbut-3-en-1-one oxime (**1a**, 16 mg, 0.1 mmol), 1,3-diphenylbut-3-en-1-one oxime (**1r**, 24 mg, 0.1 mmol), sodium triflinate (47 mg, 0.3 mmol), and lithium perchlorate (64 mg, 0.1

M) were taken in a dry undivided cell and dissolved in 6 mL of MeCN/H<sub>2</sub>O (40:1). The cell was equipped with graphite (5.2 cm×0.8 cm×0.2 cm) both as cathode and an anode. Thereafter the reaction mixture was stirred and electrolyzed at a constant current of 10 mA under argon atmosphere and room temperature for 2.5 h. After 2.5 h, the reaction mixture was monitored by TLC and, **2a** was not detected. Then the reaction mixture was concentrated under vacuum and purification was performed by column chromatography in 230-400 silica gel using 1.5% ethyl acetate in hexane to deliver **2r** (19 mg, 61%) as a white solid.

### General Procedure for Cyclic Voltammetry (CV):

Cyclic voltammetry experiment was carried out in a three-electrode cell at room temperature under air using a glassy carbon disk as working electrode and a Pt wire as the counter electrode. MeCN/H<sub>2</sub>O (40:1, 5 mL) was employed as the solvent in presence of LiClO<sub>4</sub> (0.1 M) as the electrolyte. Reference electrode Ag/AgCl was used. The scan rate was 0.1 V/s. Initially, CV of (**1a**) was measured and exhibited half peak potential ( $E_{p/2}$ ) at 1.39 V. Thereafter CV measurement was done for CF<sub>3</sub>SO<sub>2</sub>Na which showed the oxidation peaks at 1.17 V. Afterthat CV experiment was done for our desired product **2a** where we did not observed any peak in the operated potential window.

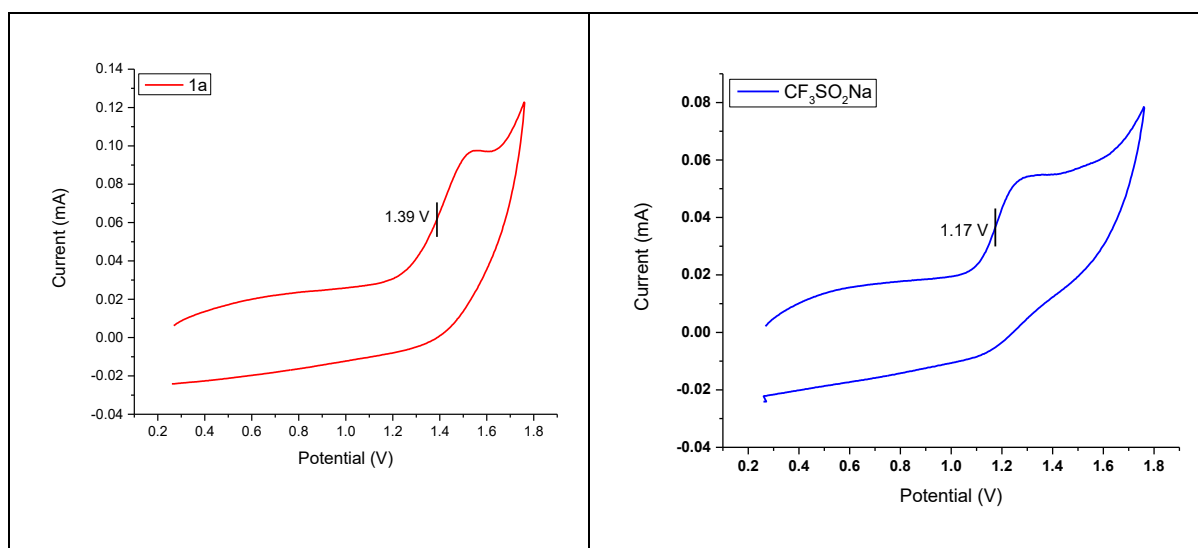

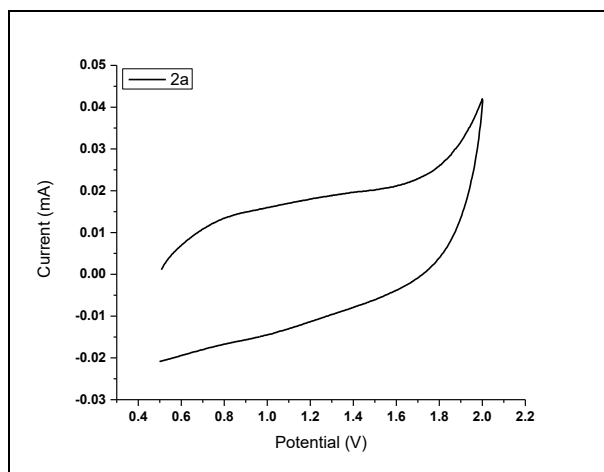

## Crystallographic Data

**Sample Preparation:** The synthesized solid of **2g** was dissolved in a binary mixture of Methanol-Hexane (2:1) into a vial. The nice quality blocked-shaped crystals suitable for SCXRD were obtained after 3 days by the slow evaporation of the solvents.

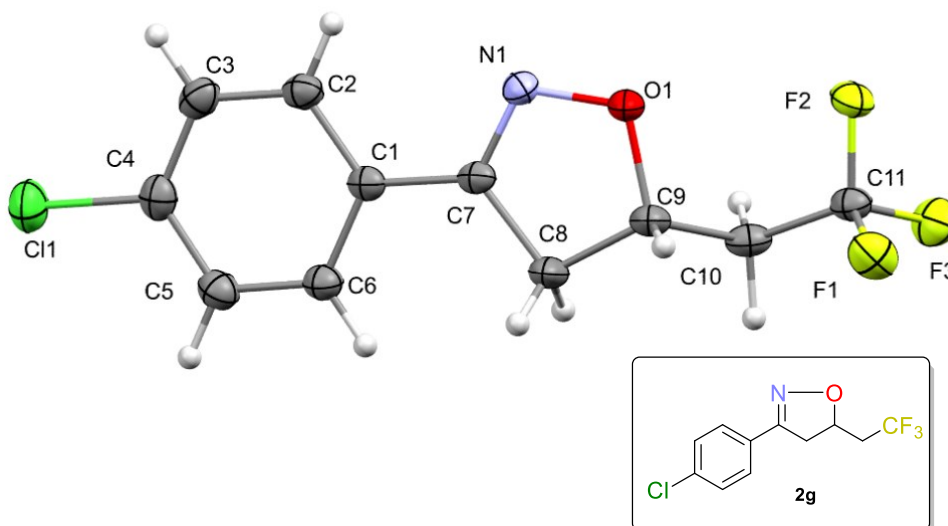

**Figure S1:** ORTEP diagram of compound **2g**.

**Table S1.** Crystallographic and Structural Refinement Parameters of **2g**

| Compound Name   | <b>2g</b> |
|-----------------|-----------|
| Temperature (K) | 100 K     |

|                                           |                                                    |
|-------------------------------------------|----------------------------------------------------|
| Formula                                   | C <sub>11</sub> H <sub>9</sub> ClF <sub>3</sub> NO |
| Formula Weight                            | 263.64                                             |
| Crystal System                            | Monoclinic                                         |
| Space group                               | <i>P2<sub>1</sub>/c</i>                            |
| <i>a</i> /Å                               | 14.0286(3)                                         |
| <i>b</i> /Å                               | 10.8221(2)                                         |
| <i>c</i> /Å                               | 7.36612(15)                                        |
| $\alpha$ /°                               | 90.00                                              |
| $\beta$ /°                                | 102.292(2)                                         |
| $\gamma$ /°                               | 90.00                                              |
| <i>V</i> /Å <sup>3</sup>                  | 1092.68(4)                                         |
| <i>Z</i>                                  | 4                                                  |
| <i>D<sub>c</sub></i> / g cm <sup>-3</sup> | 1.603                                              |
| $\mu$ /mm <sup>-1</sup>                   | 3.370                                              |
| <i>F</i> (000)                            | 536                                                |
| $\theta$ range/°                          | 3.224-68.182                                       |
| Measured Refl.                            | 9412                                               |
| Independent Refl.                         | 1981                                               |
| <i>R<sub>int</sub></i>                    | 0.0491                                             |
| Goodness of fit ( <i>F</i> <sup>2</sup> ) | 1.043                                              |
| <i>R</i> 1 (all data)                     | 0.0399                                             |
| <i>wR</i> 2 (all data)                    | 0.1049                                             |
| CCDC No.                                  | 2208817                                            |

### Image of Divided Cell Setup:

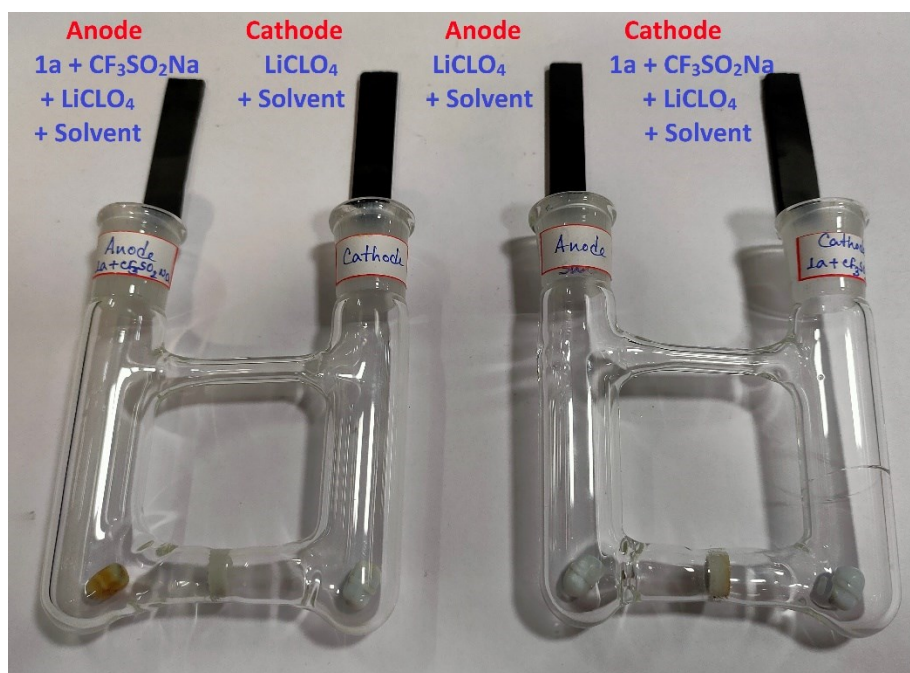

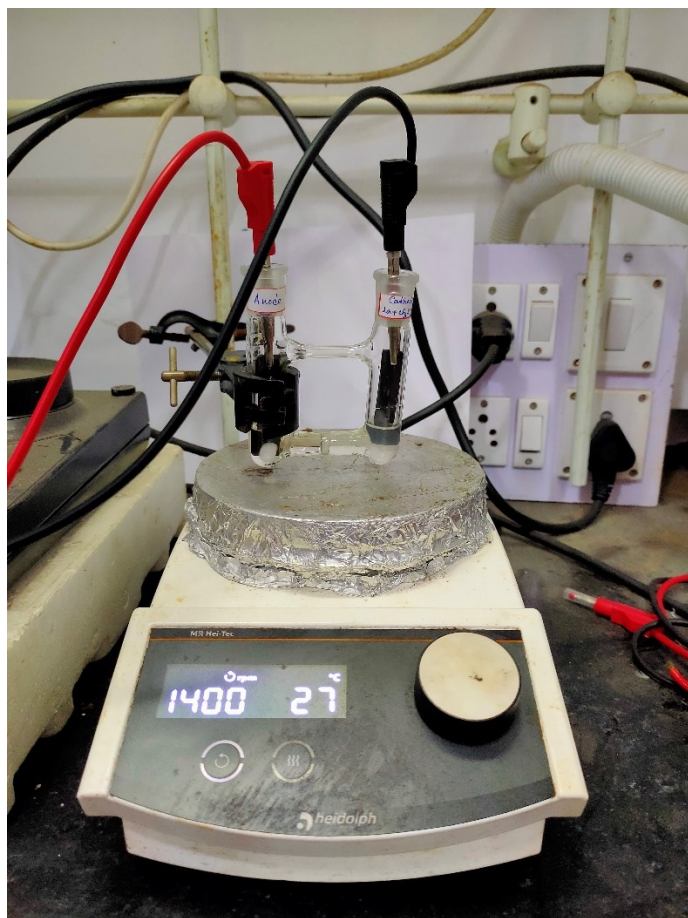

## Reference:

- 1) Y. T. He, L. H. Li, Y. F. Yang, Y. Q. Wang, J. Y. Luo, X. Y. Liu, Y. M. Liang, *Chem. Commun.* **2013**, 49, 5687-5689.
- 2) C. B. Tripathi, S. Mukherjee, *Angew. Chem. Int. Ed.* **2013**, 52, 8450–8453.
- 3) W. Zhang, Y. Su, K. H. Wang, L. Wu, B. Chang, Y. Shi, D. Huang, Y. Hu, *Org. Lett.* **2017**, 19, 376–379.
- 4) M. Christakakou, M. Schön, M. Schnürch, M. D. Mihovilovic, *Synlett* **2013**, 24, 2411–2418.
- 5) Q. Wei, J. R. Chen, X. Q. Hu, X. C. Yang, B. Lu, W. J. Xiao, *Org. Lett.* **2015**, 17, 4464–4467.

## NMR Spectra of Synthesized Compounds:

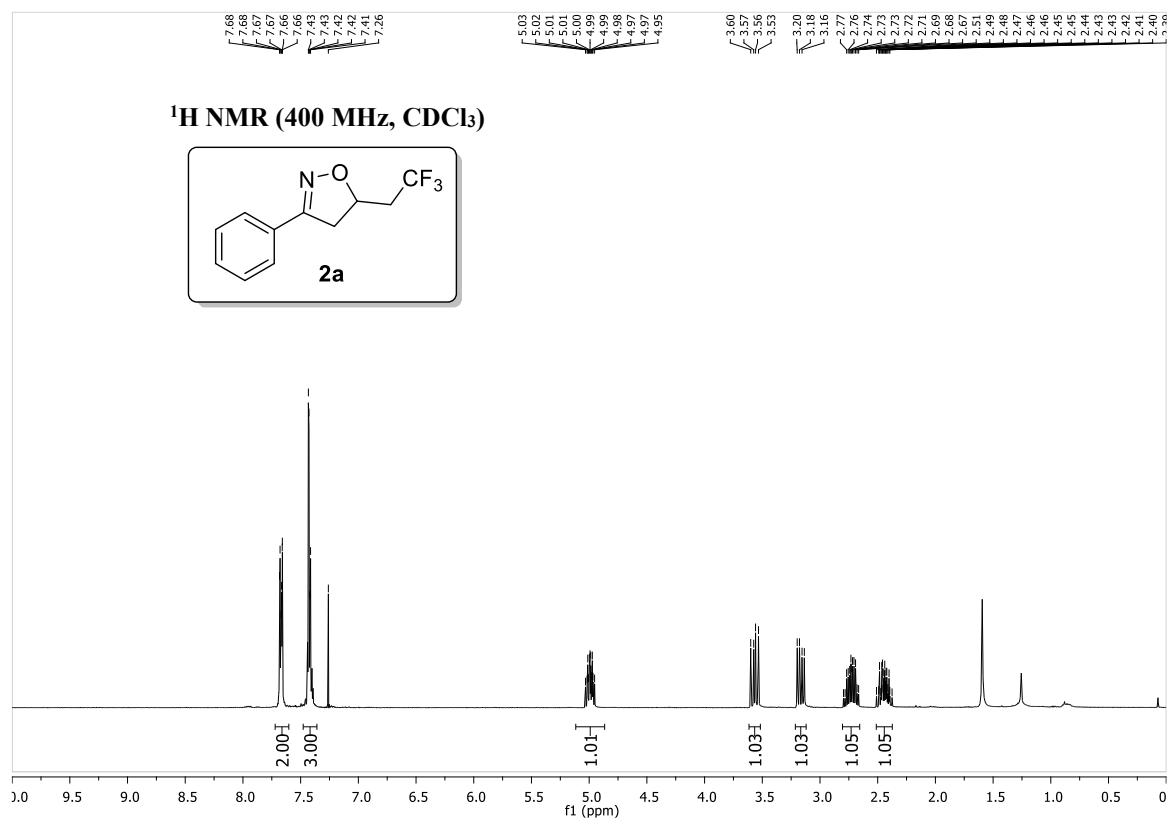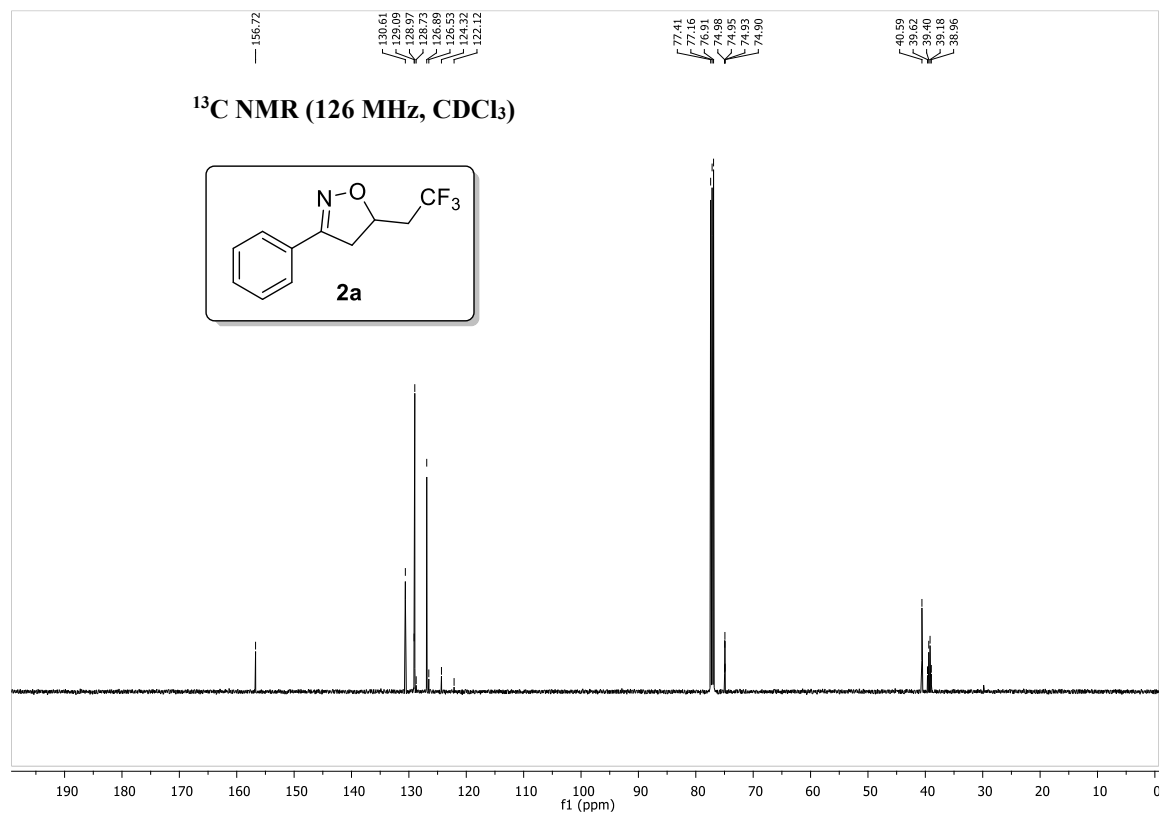

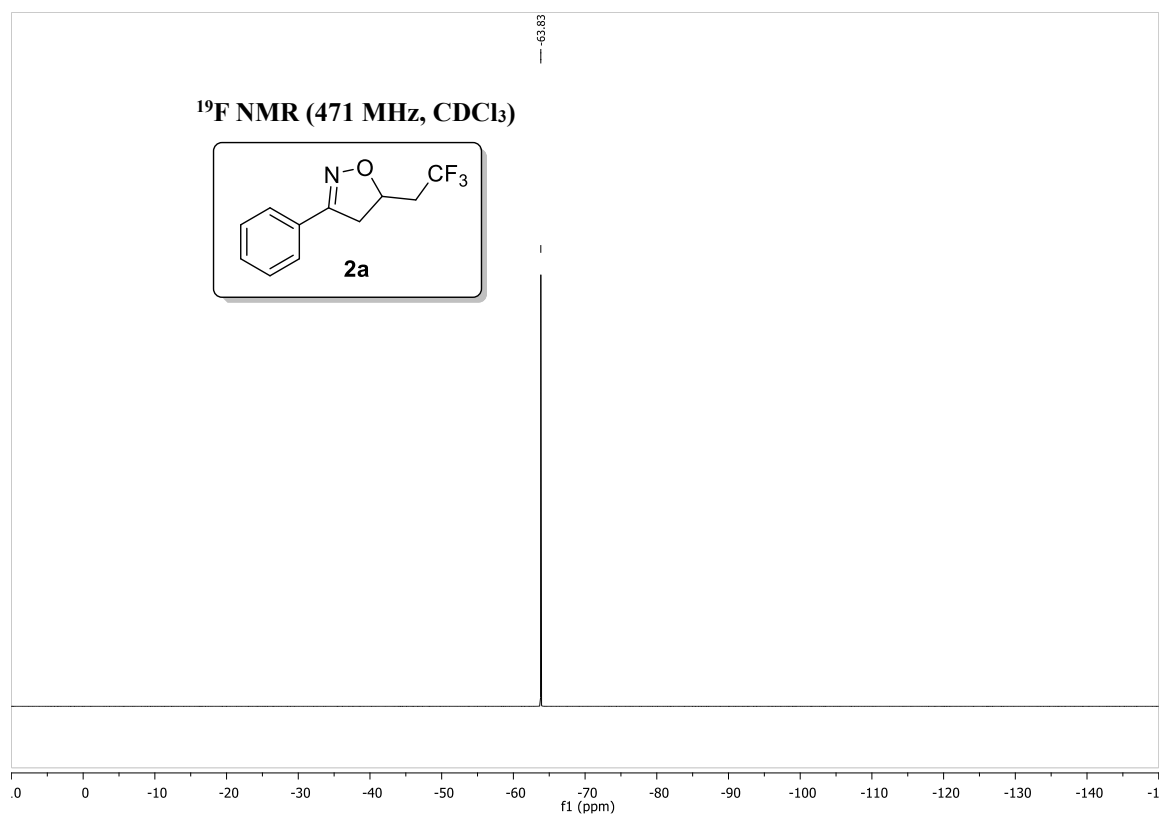

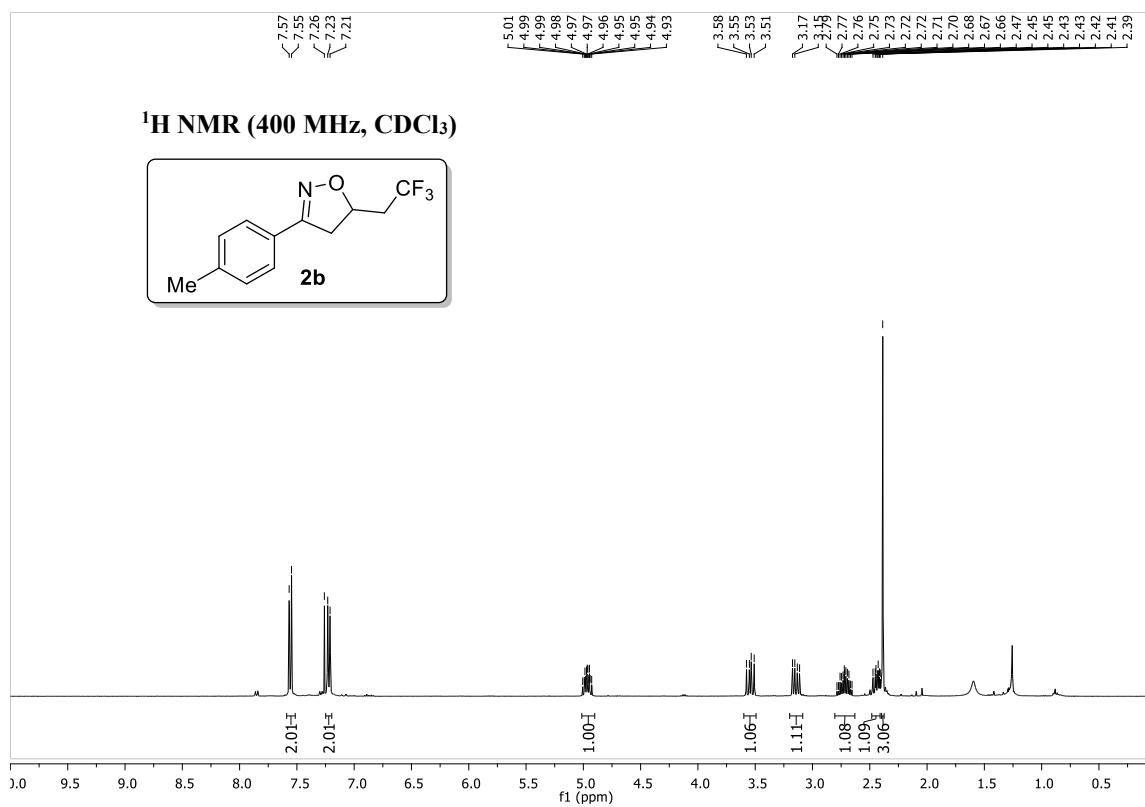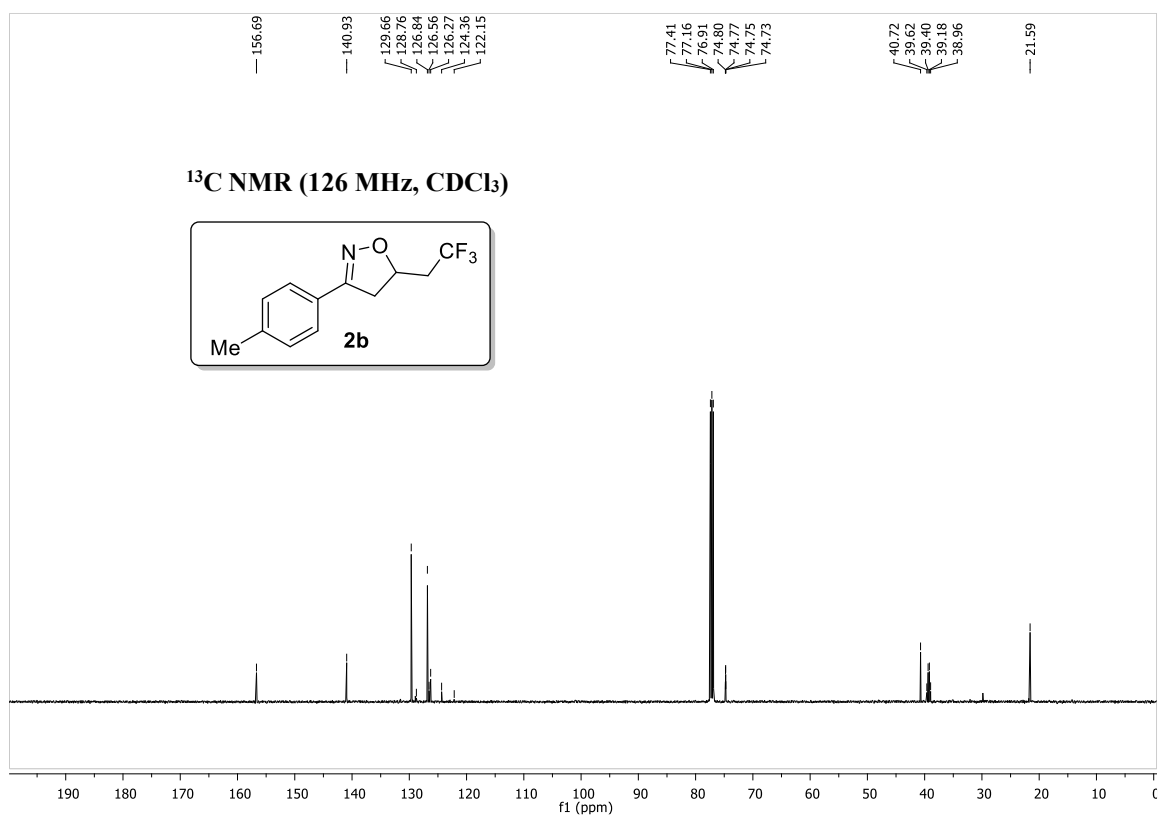

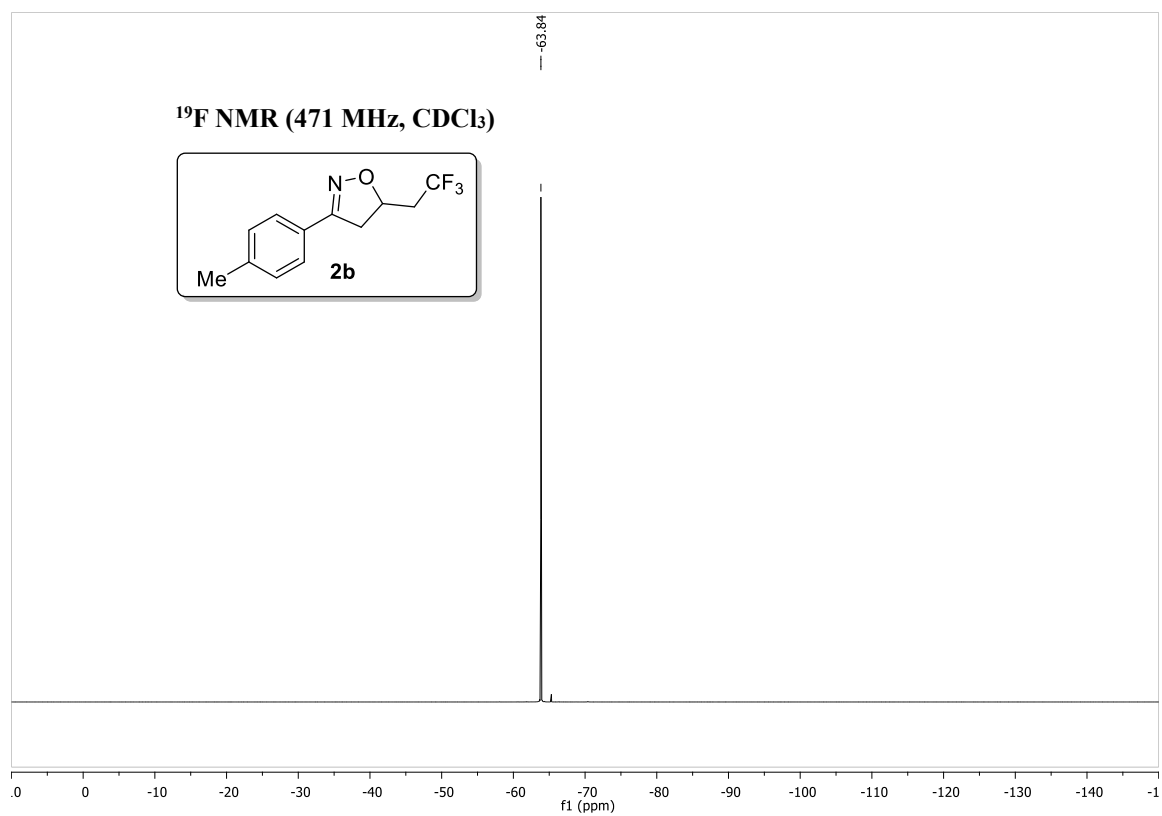

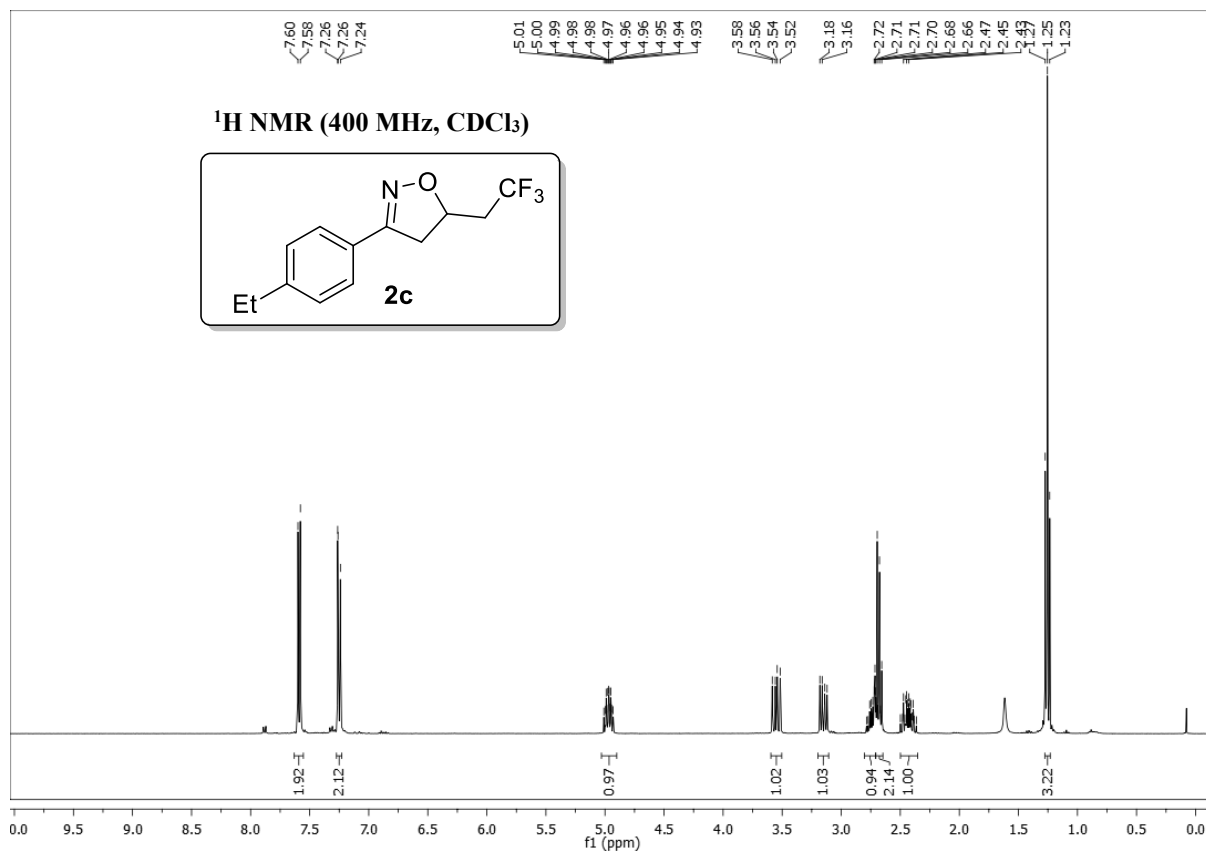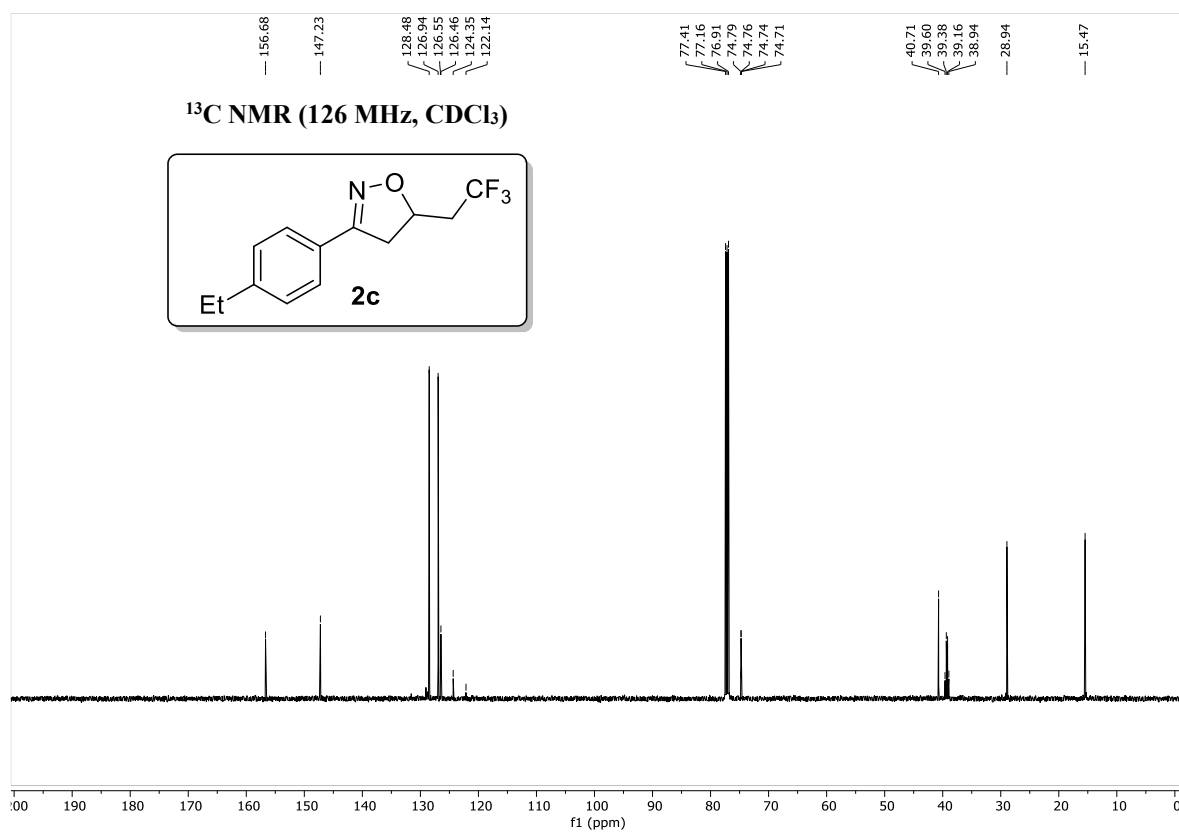

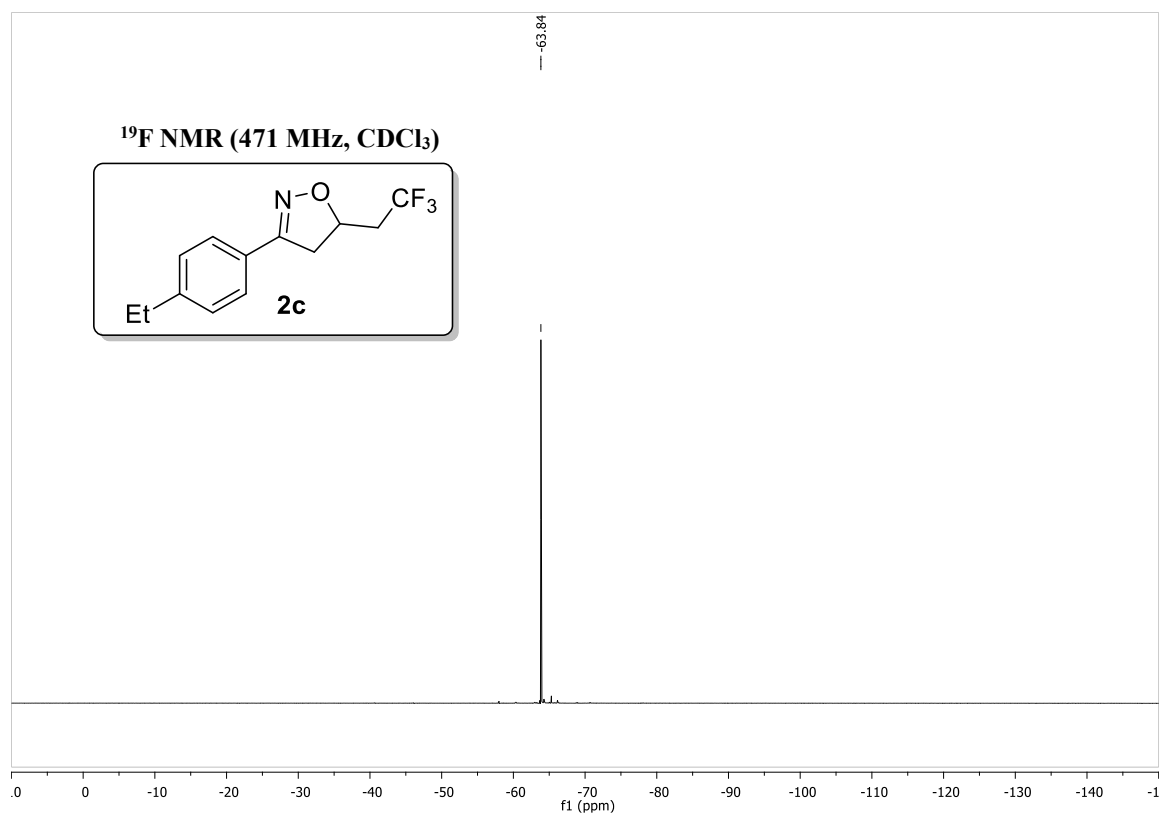

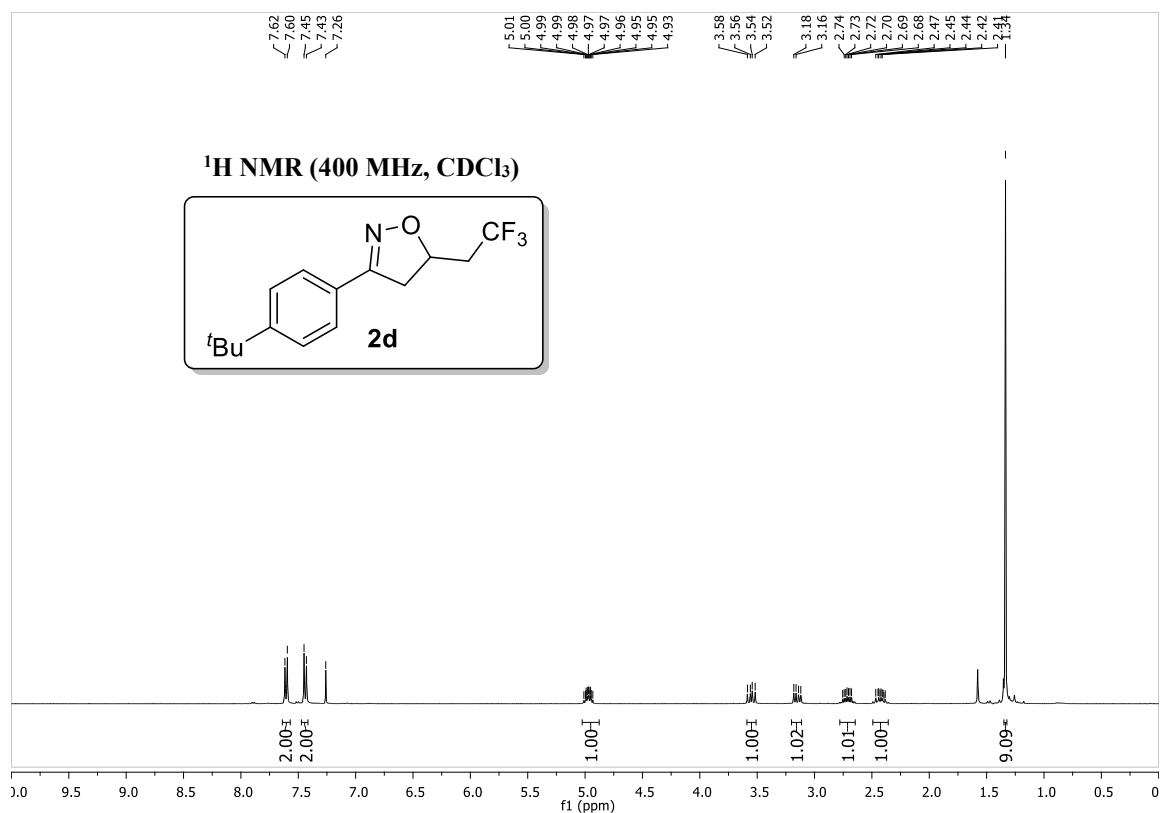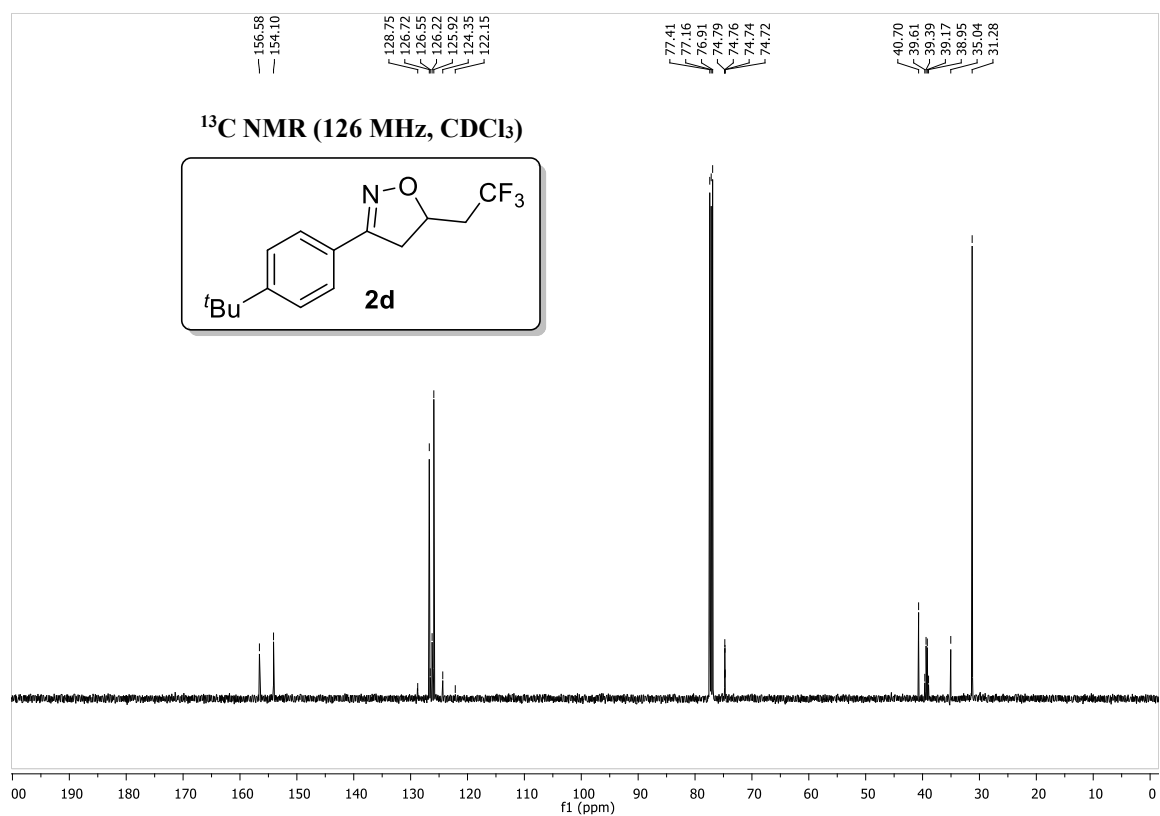

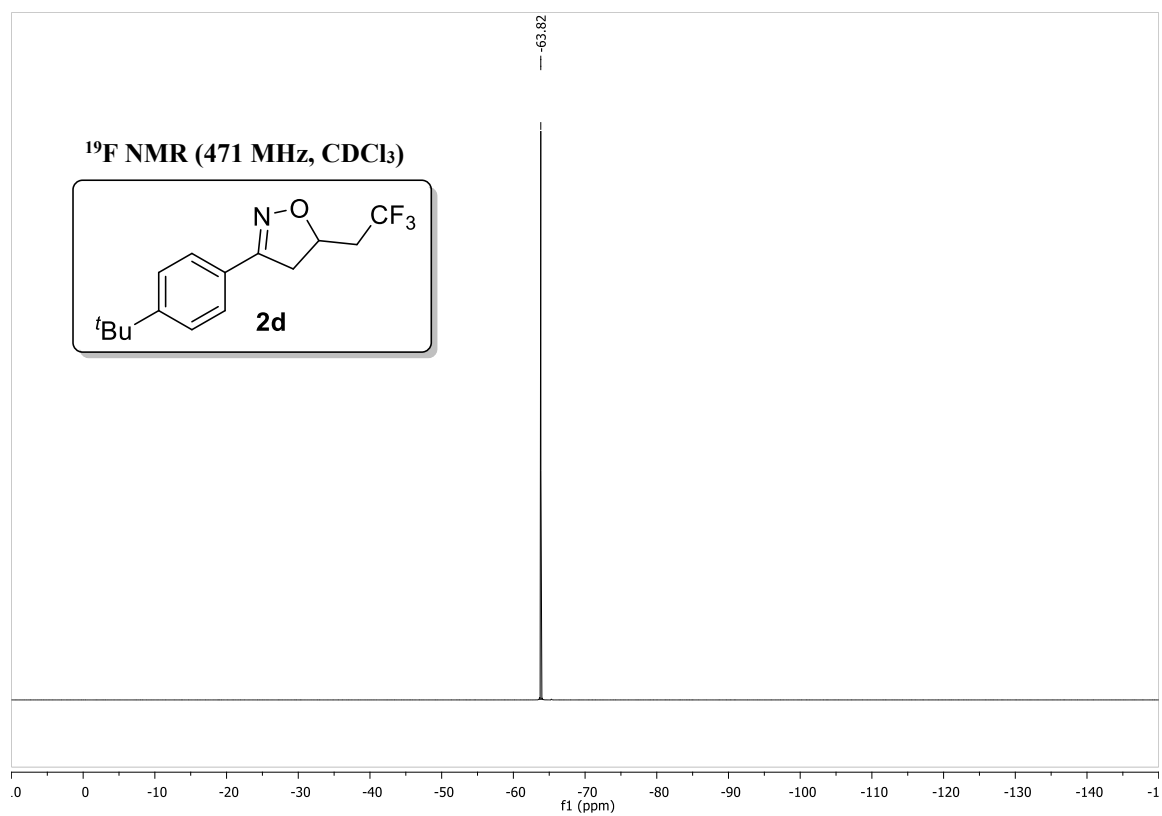

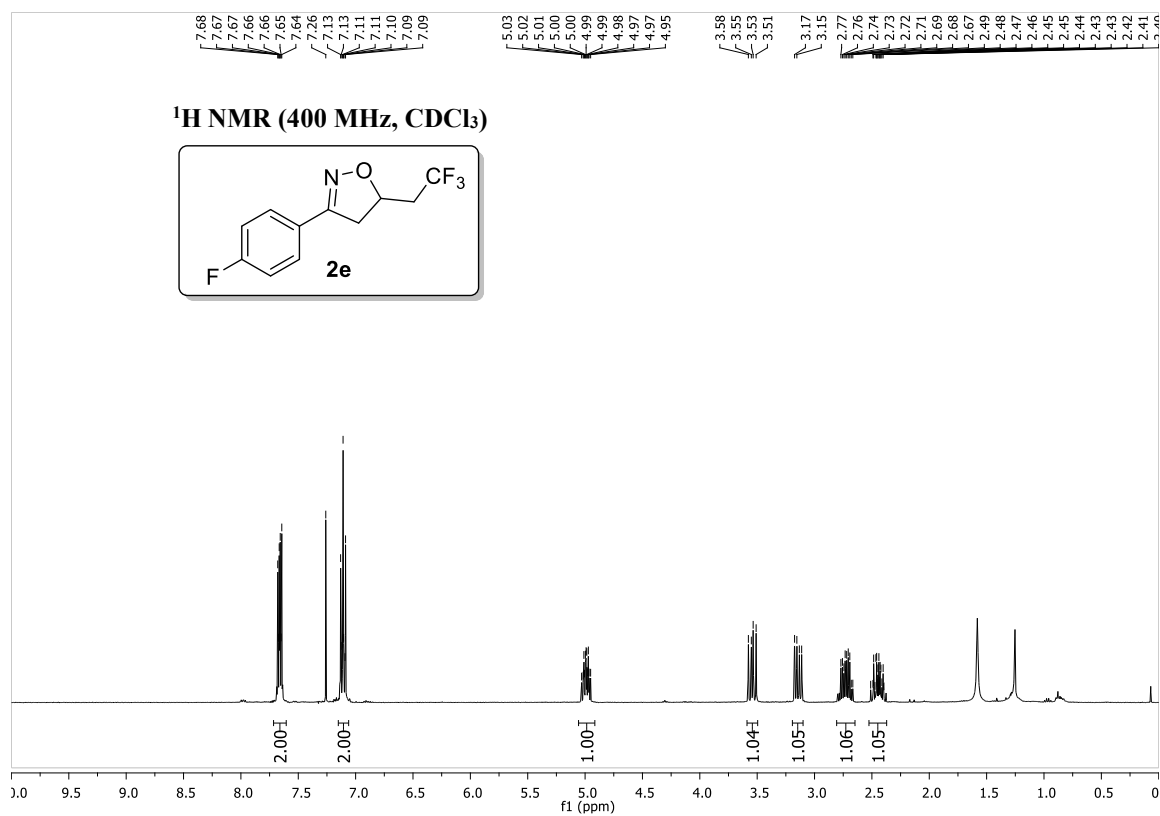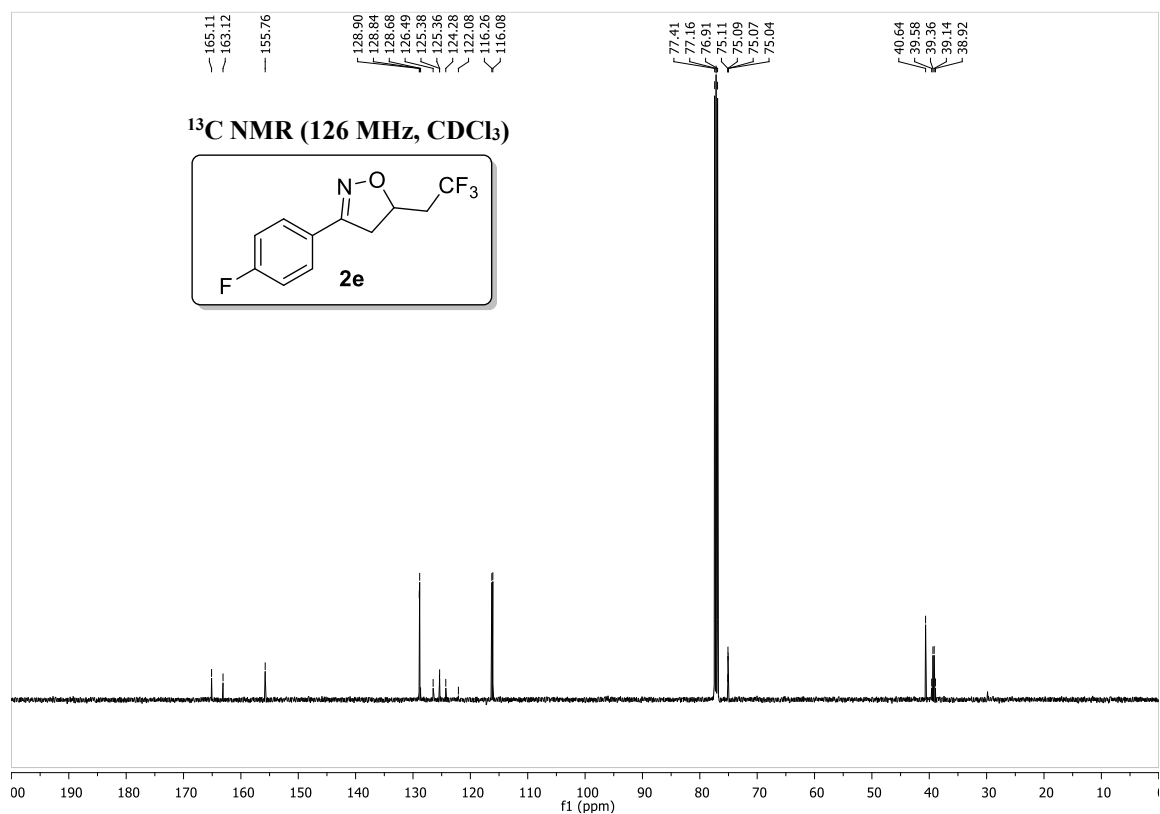

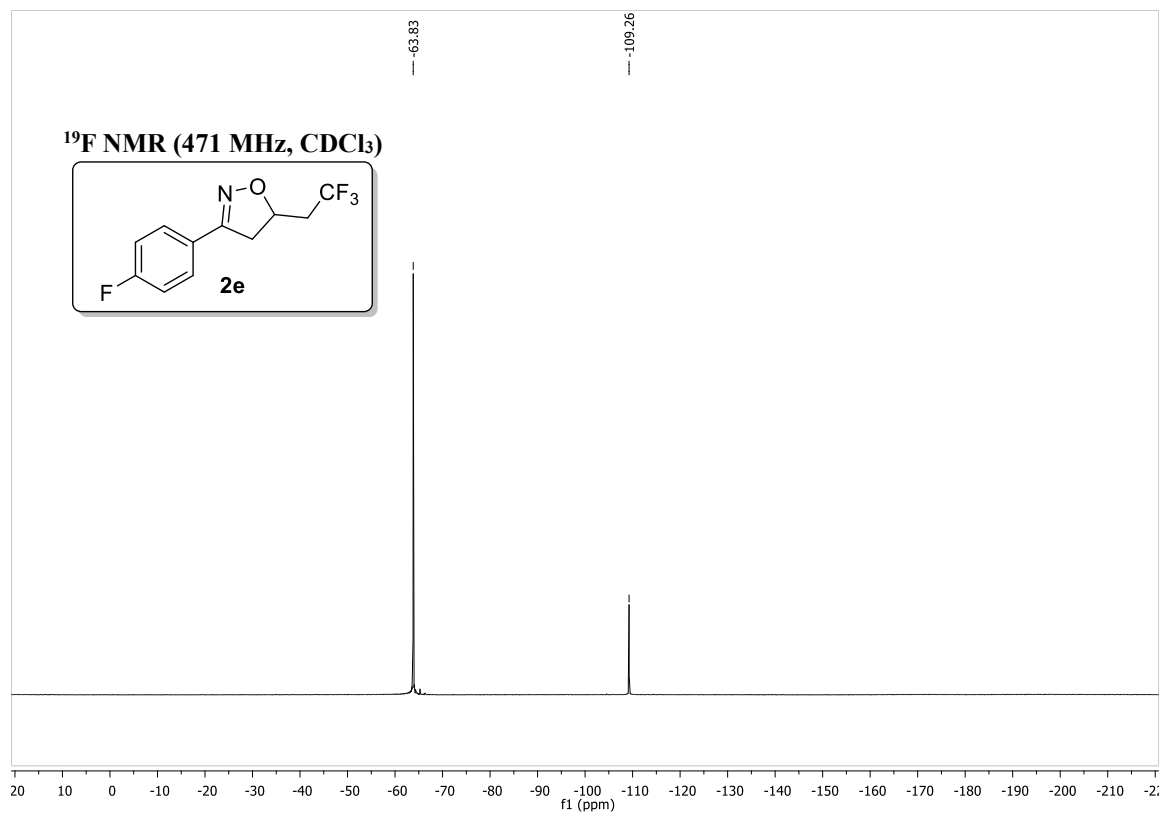

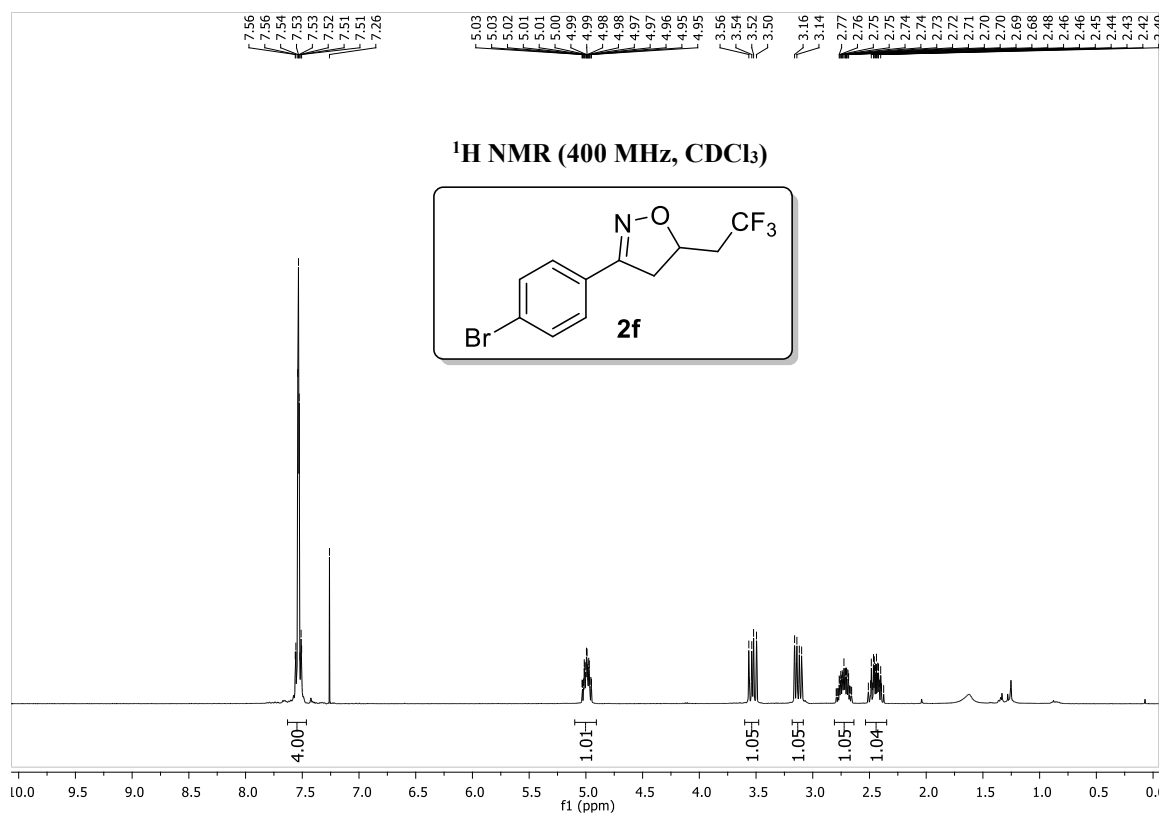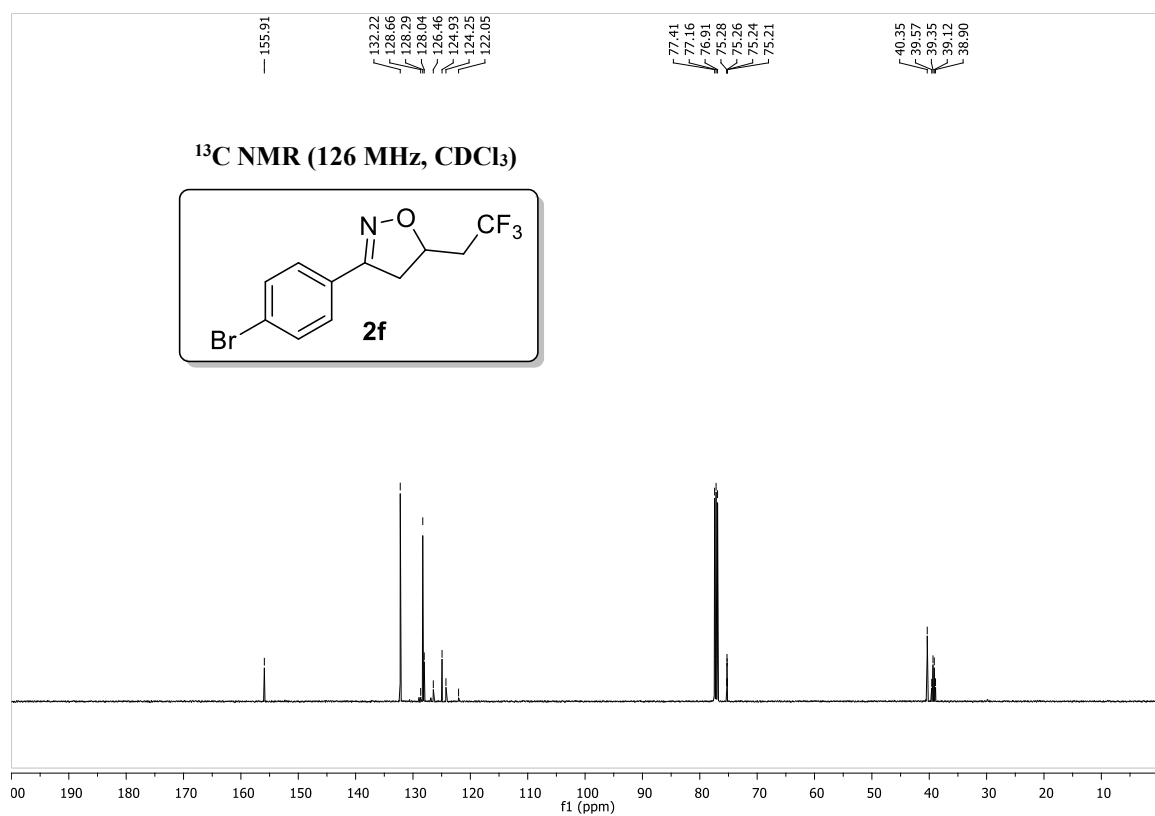

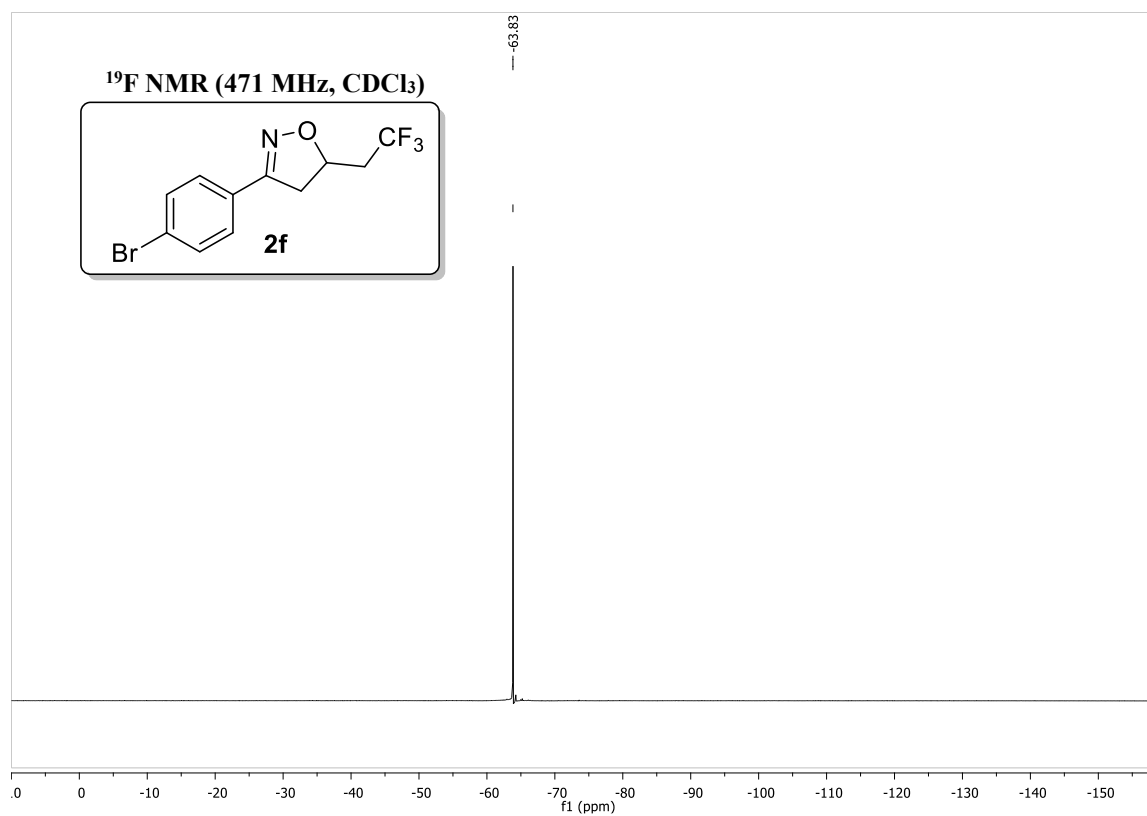

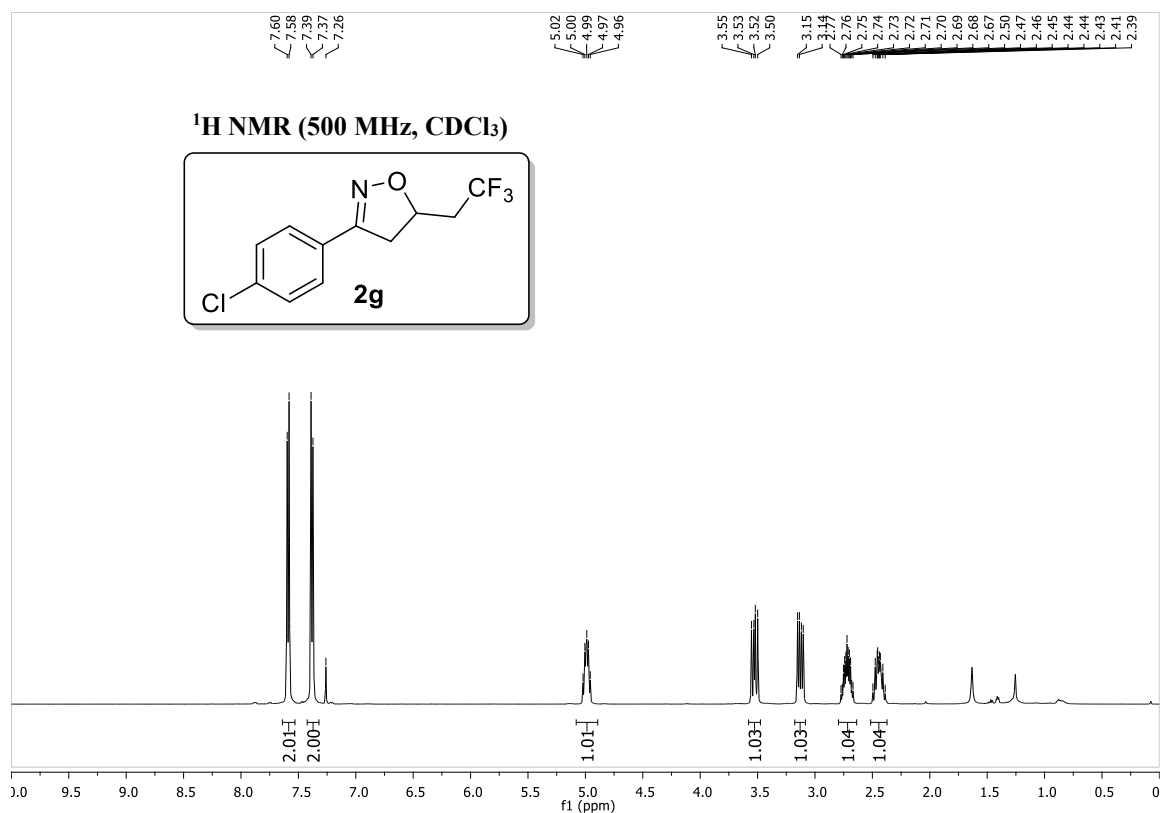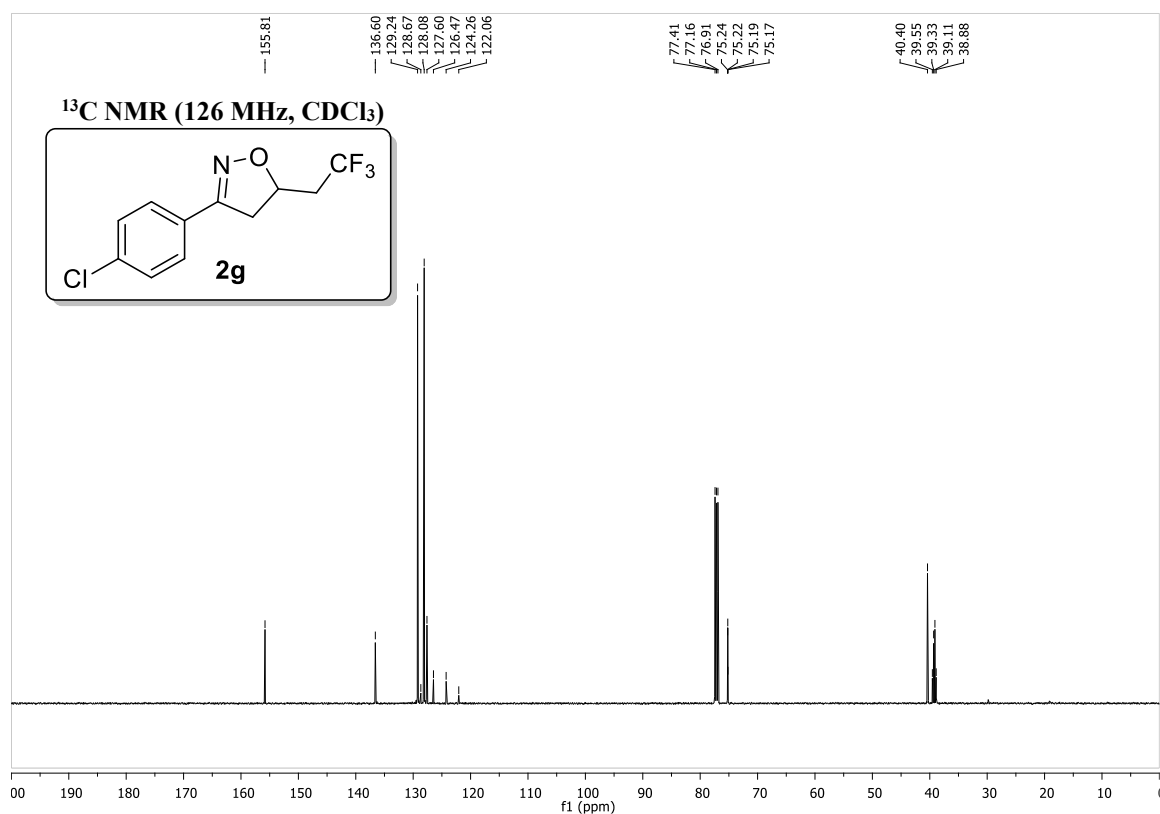

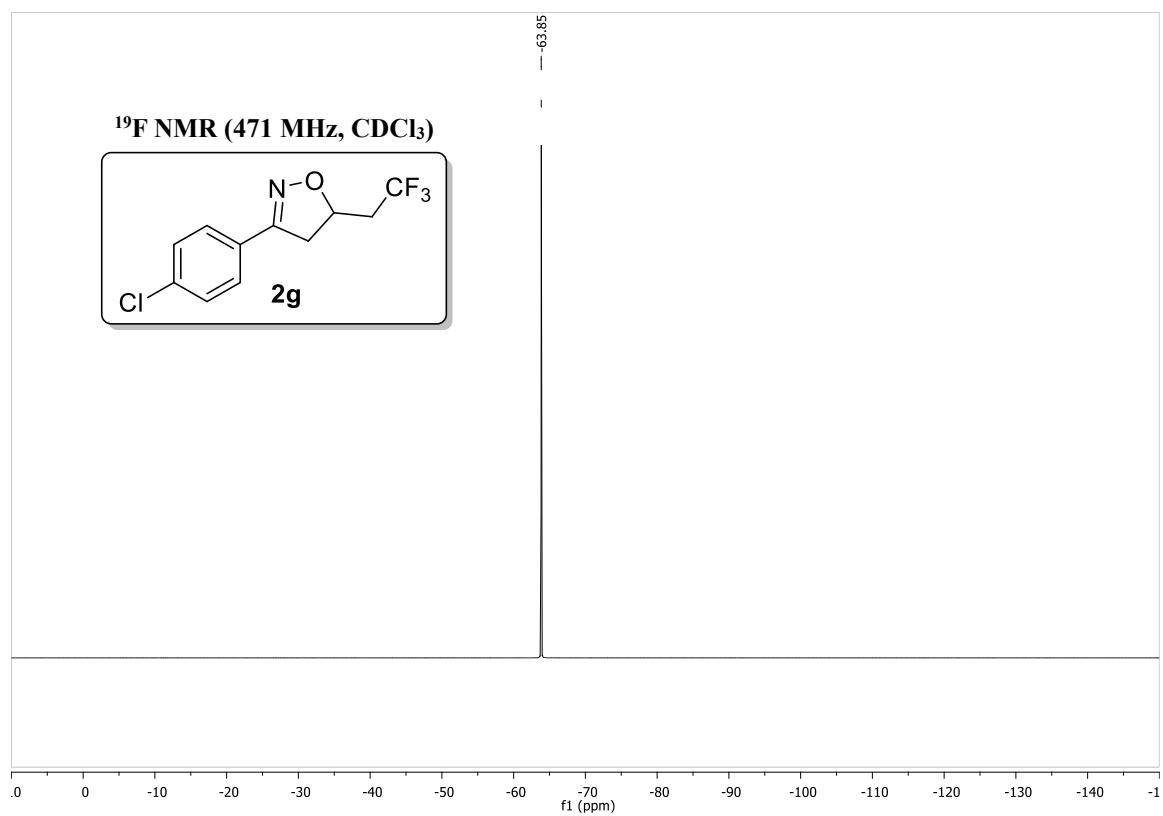

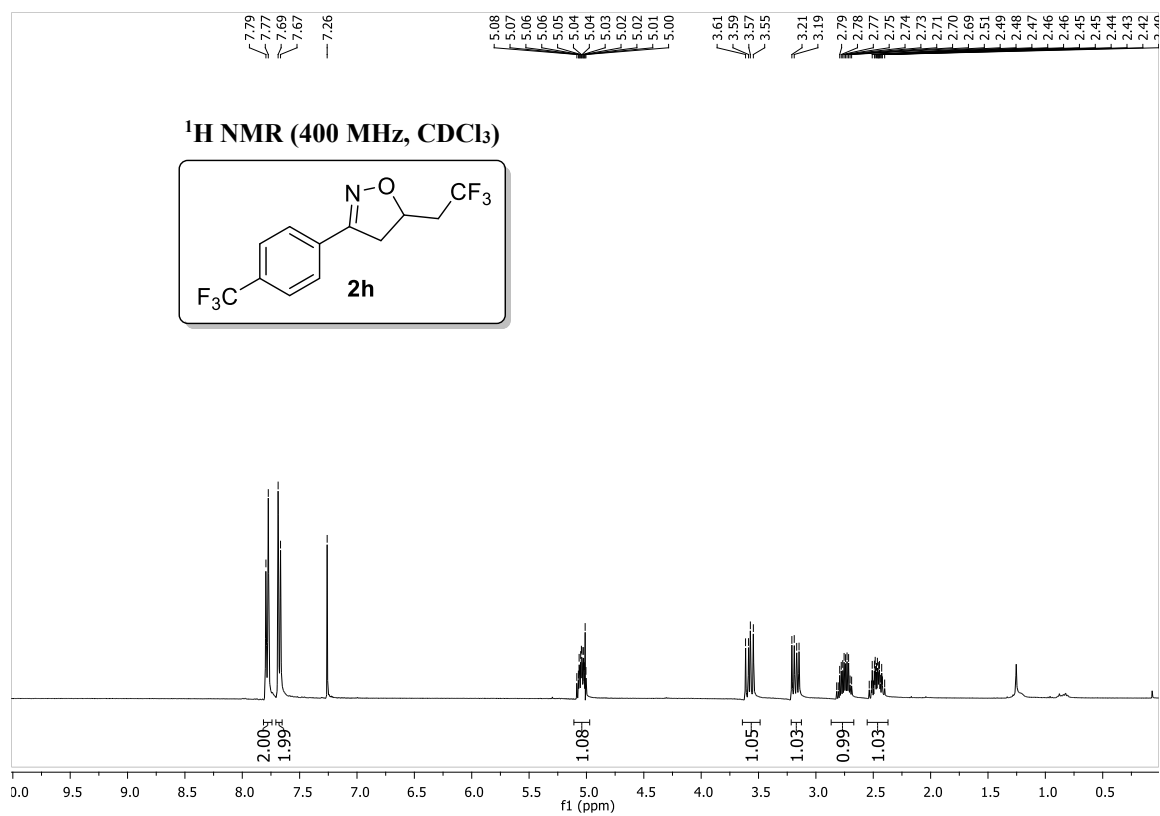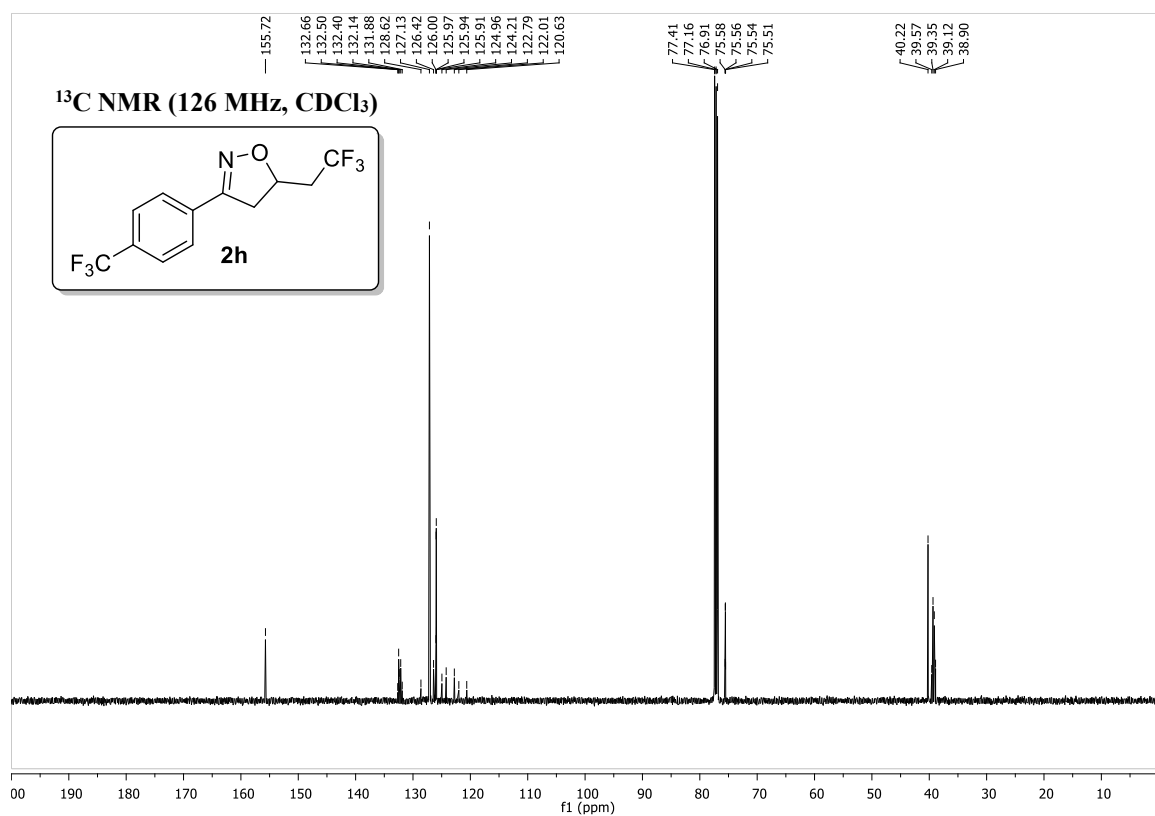

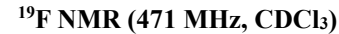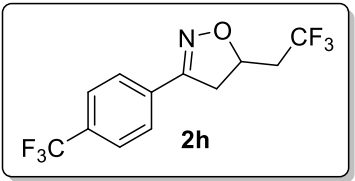

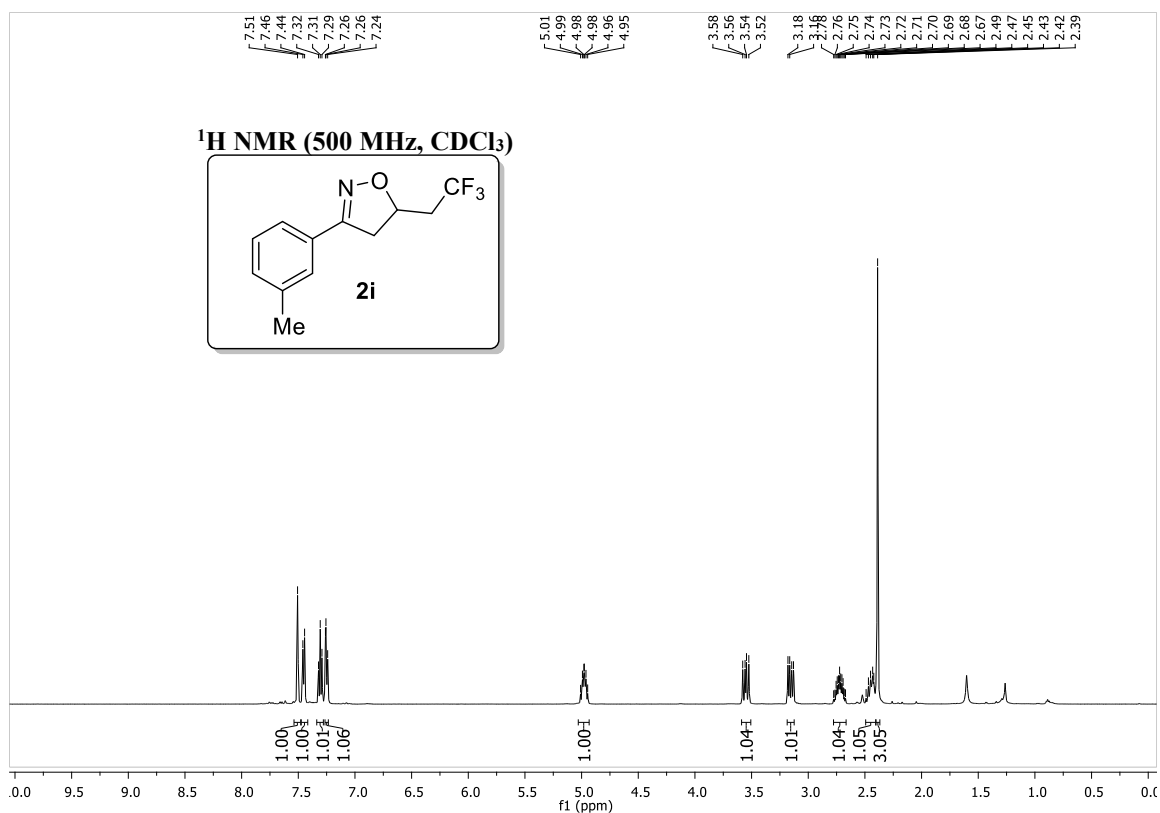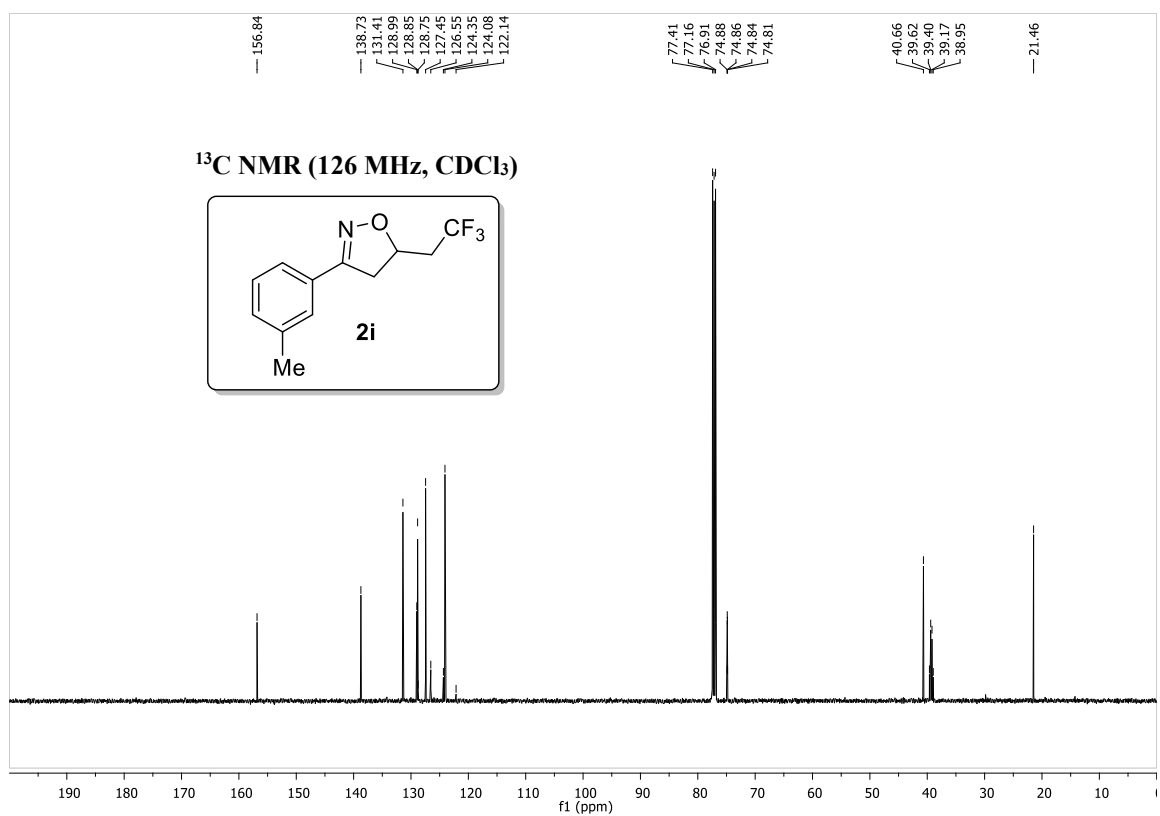

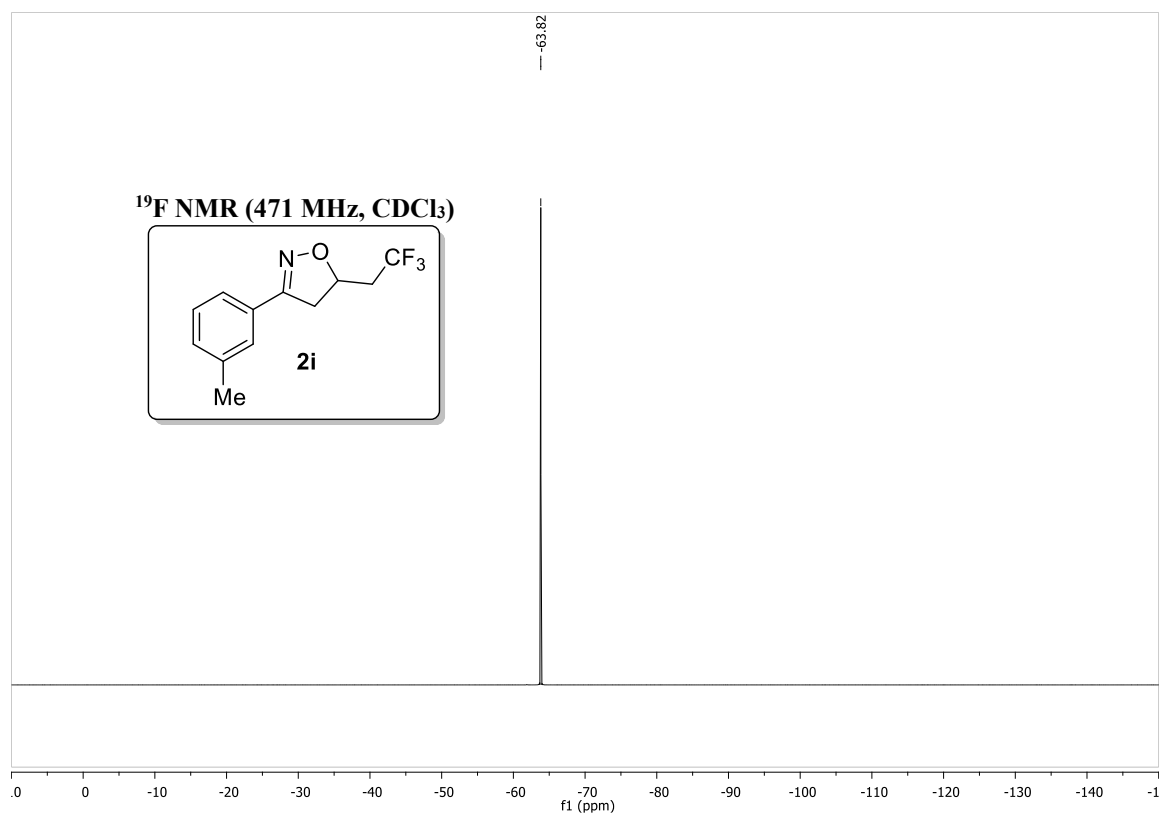

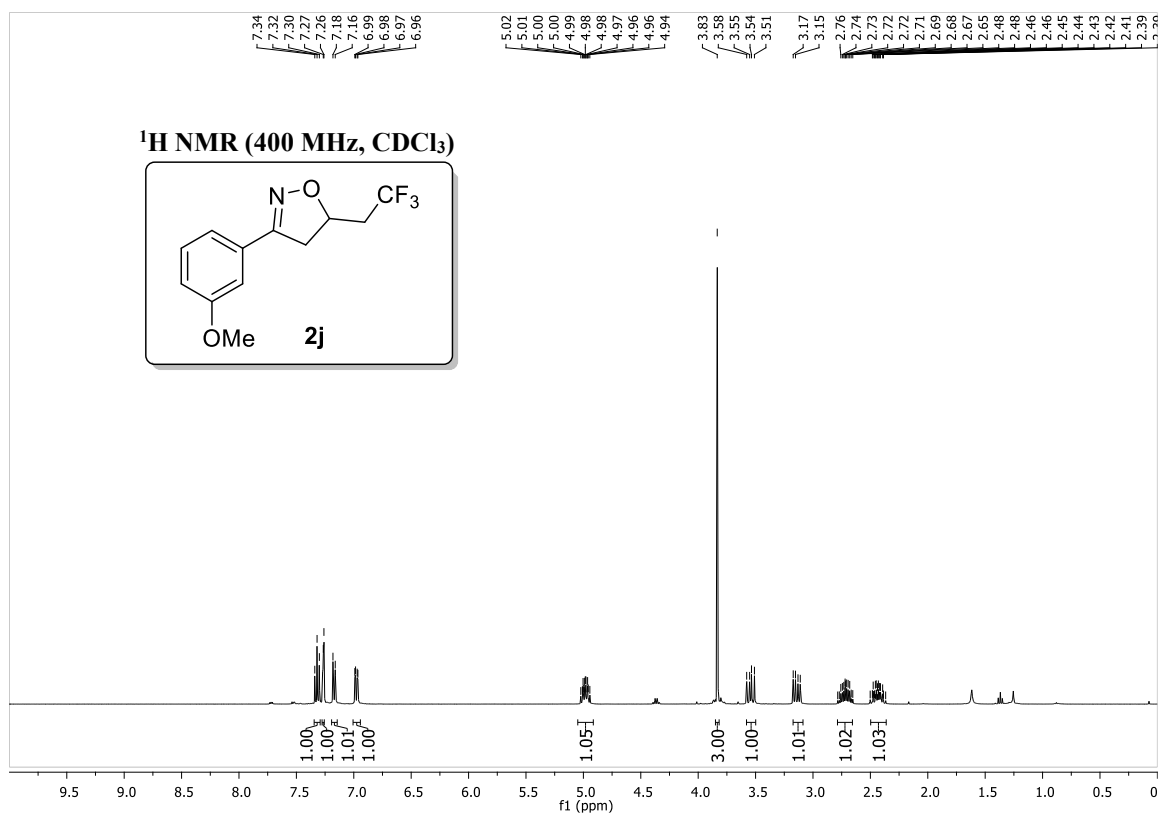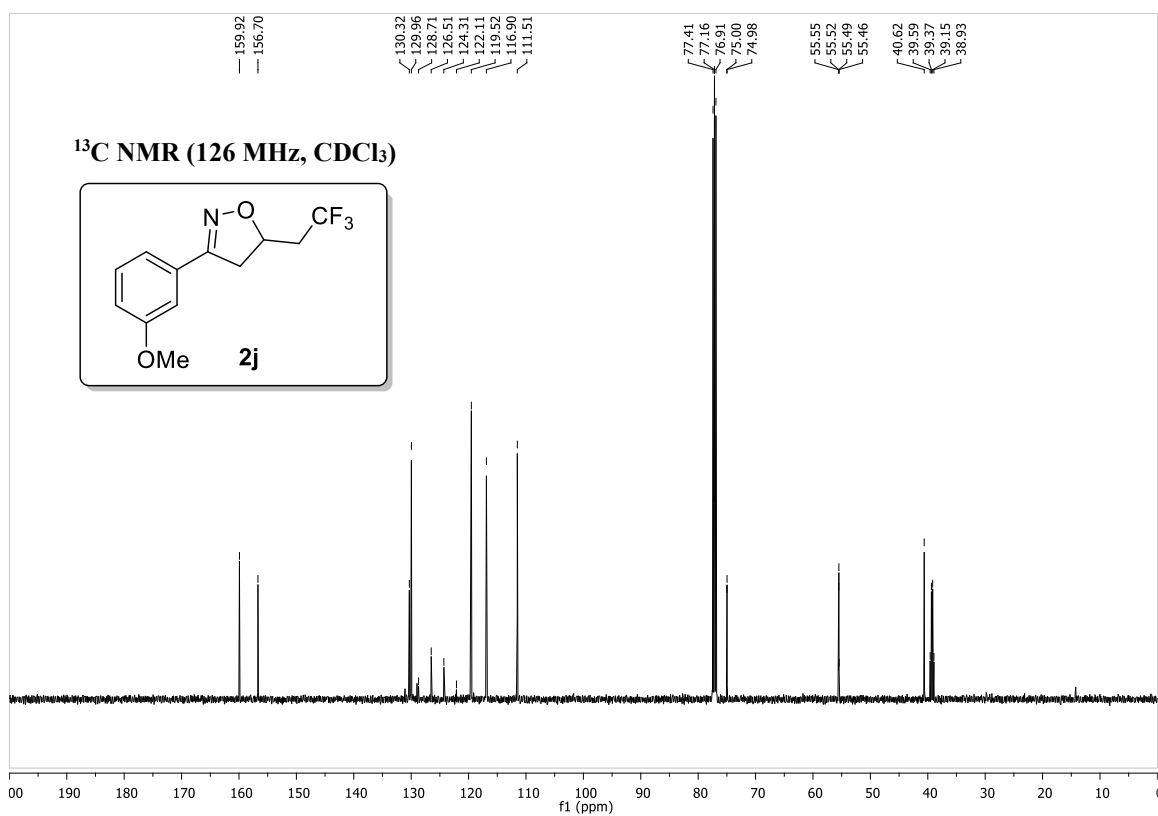

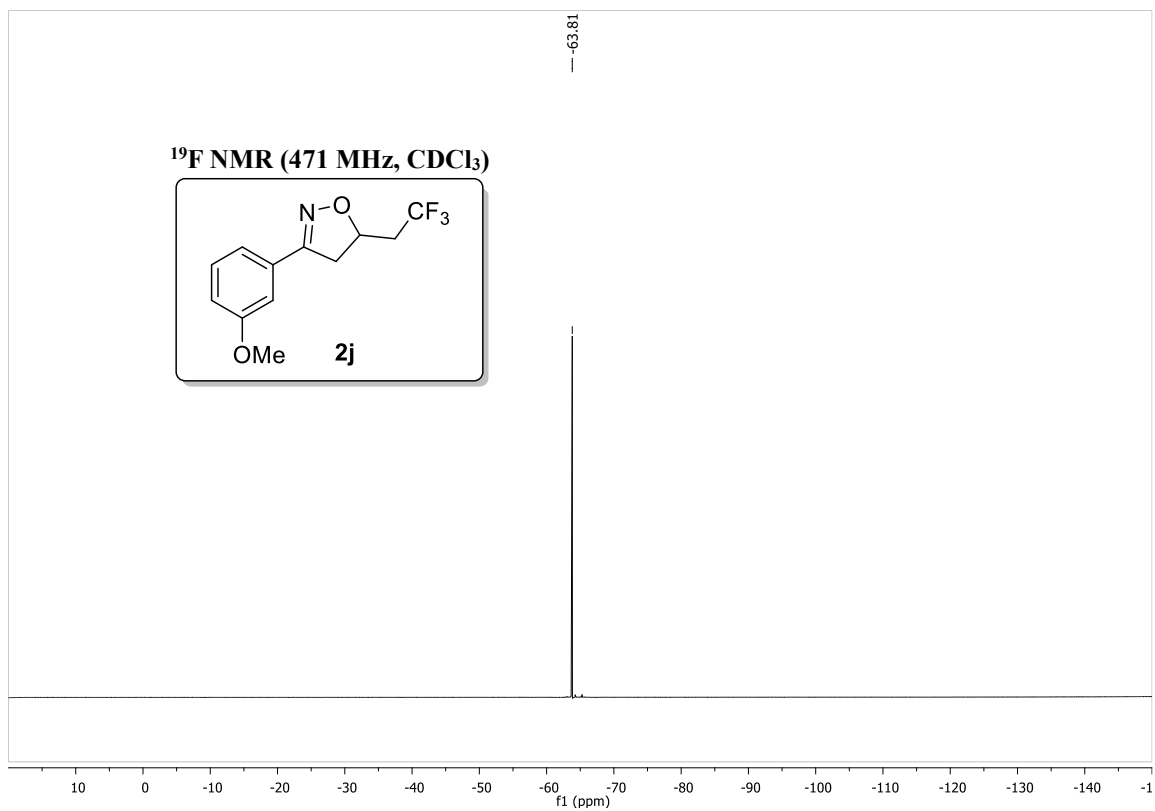

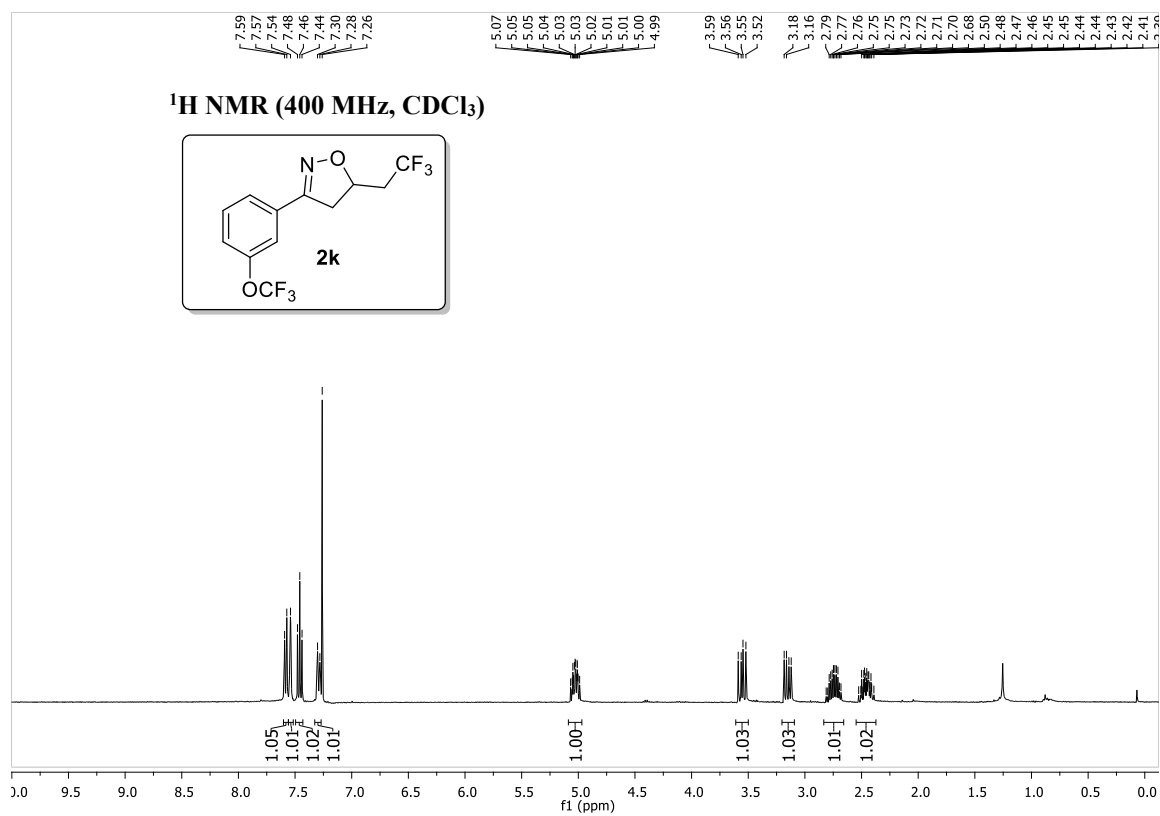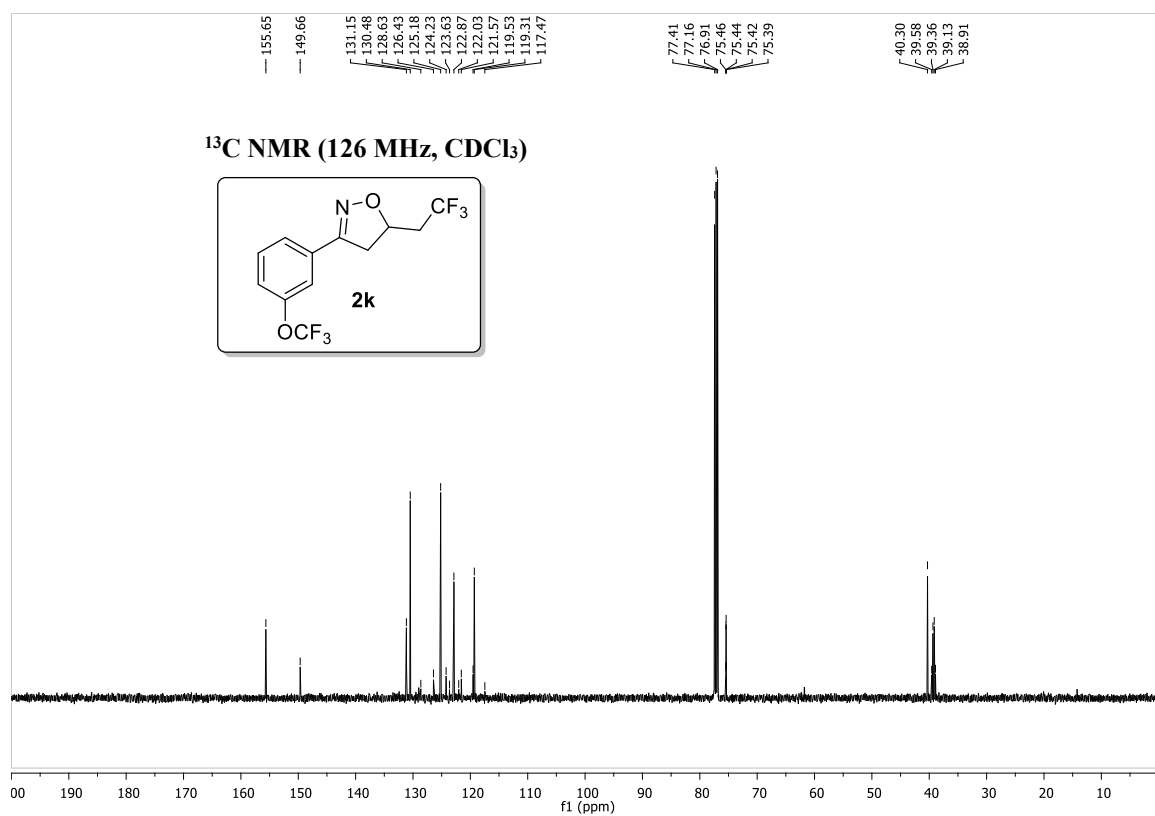

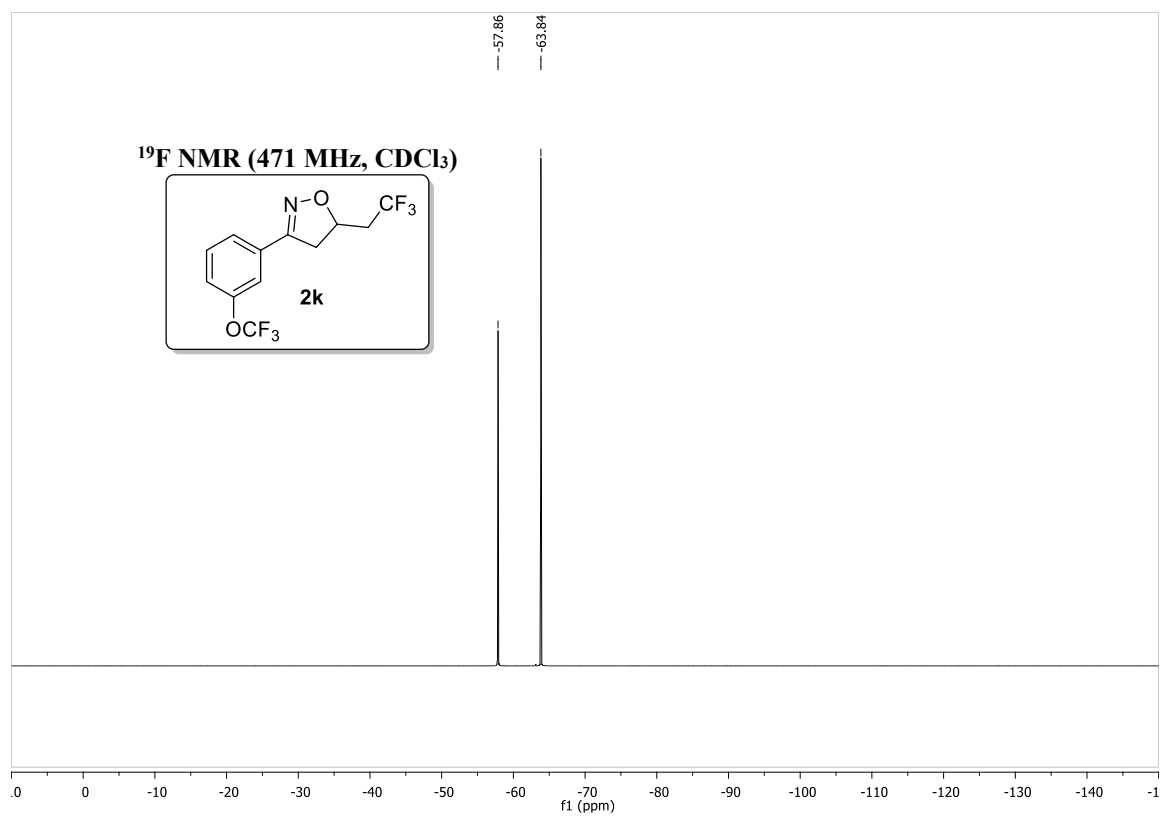

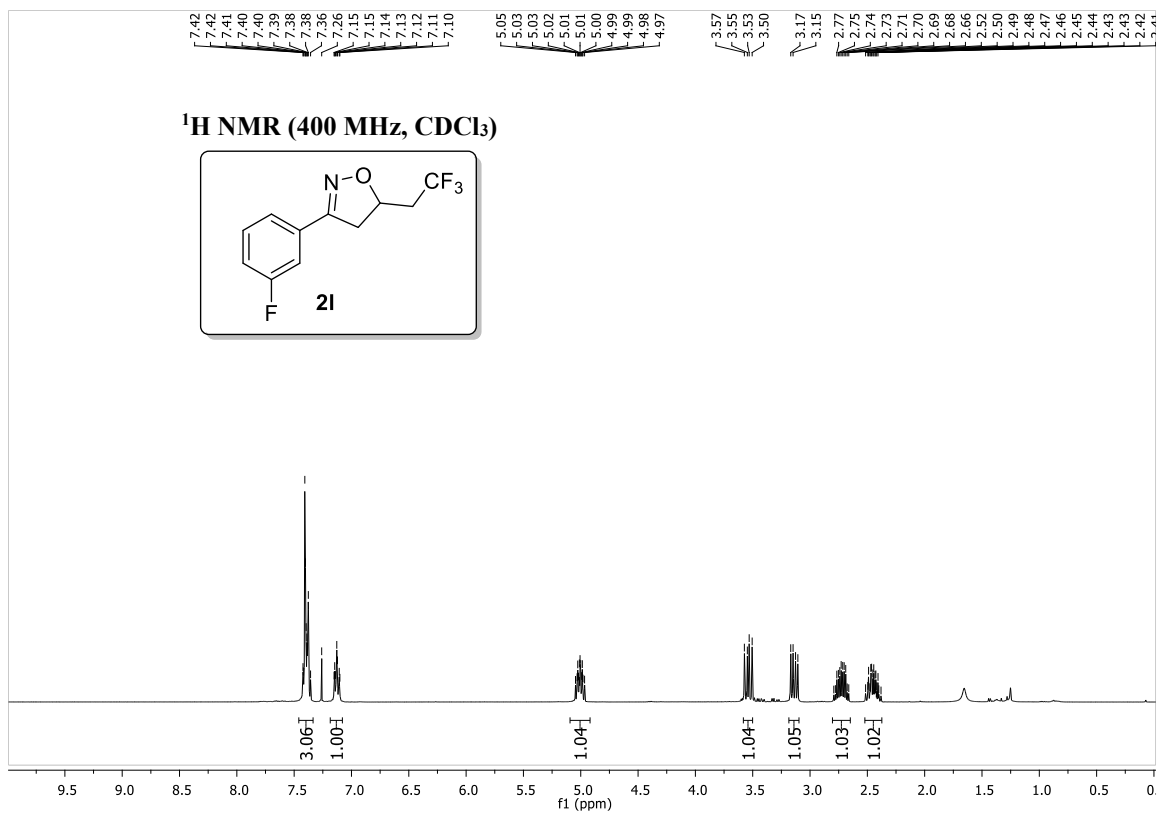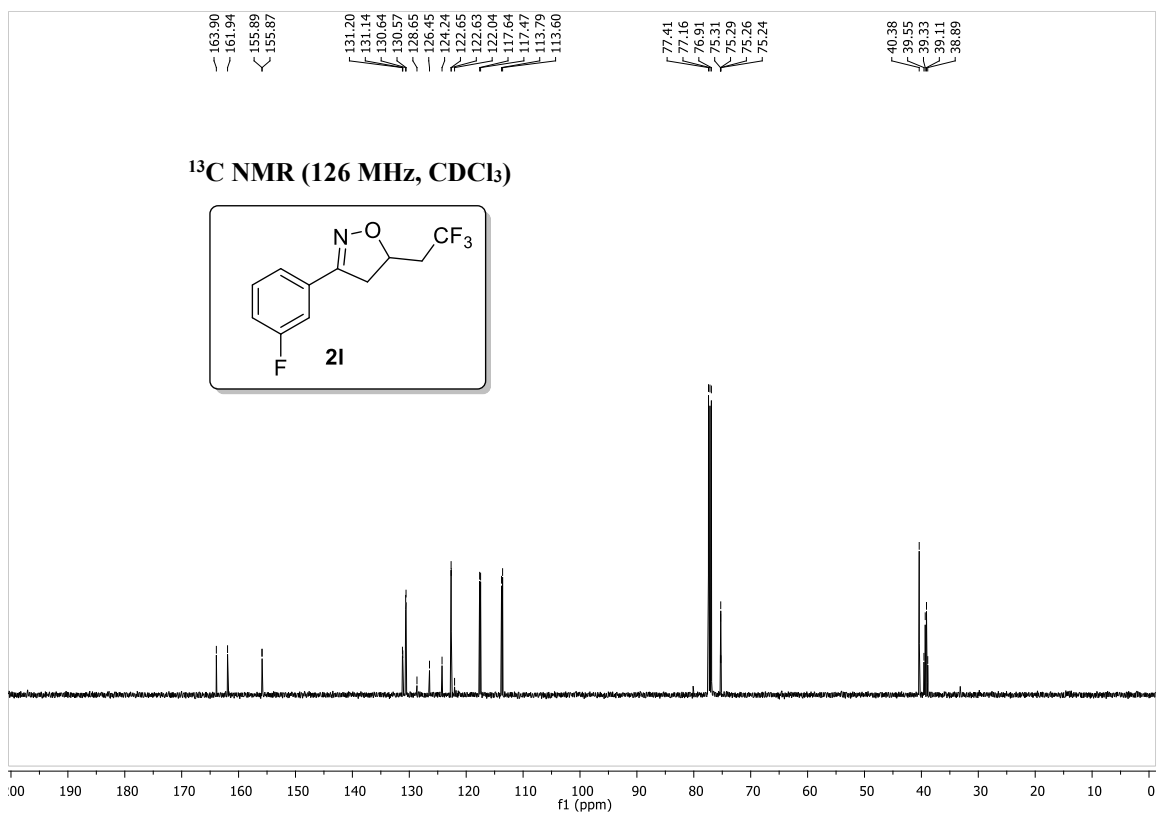

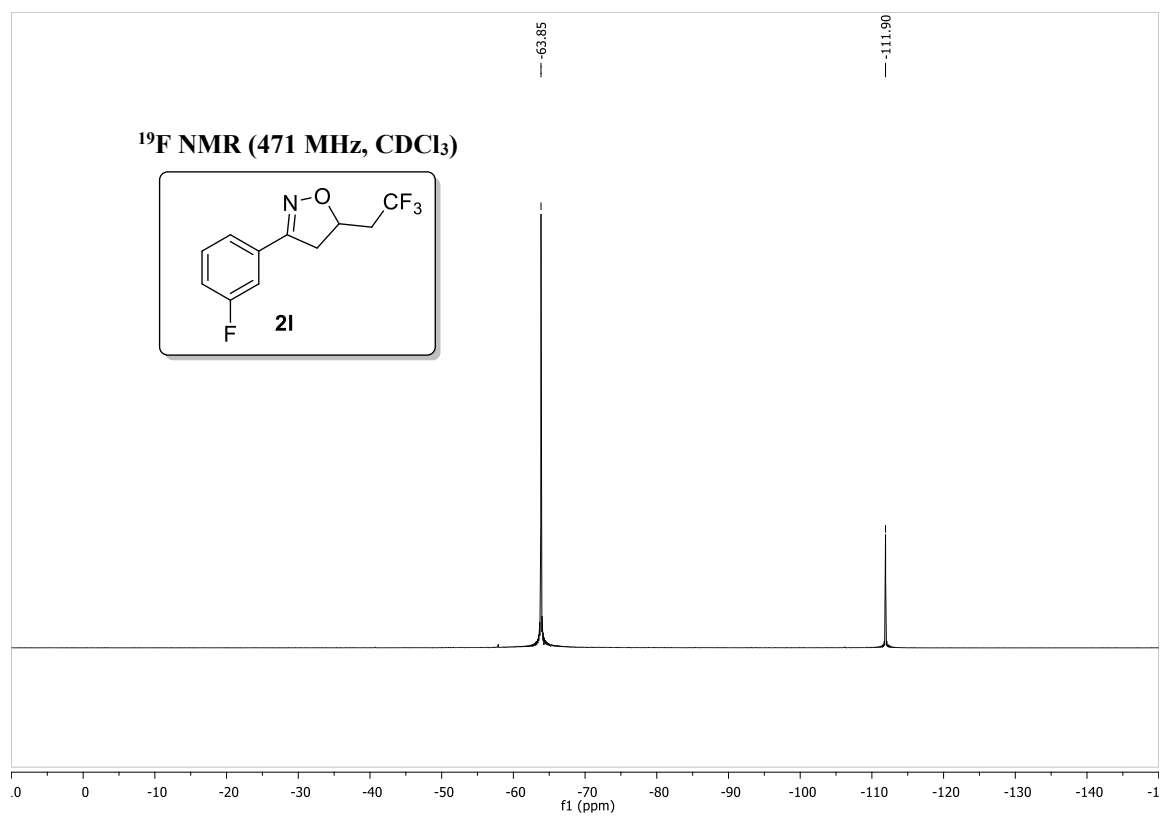

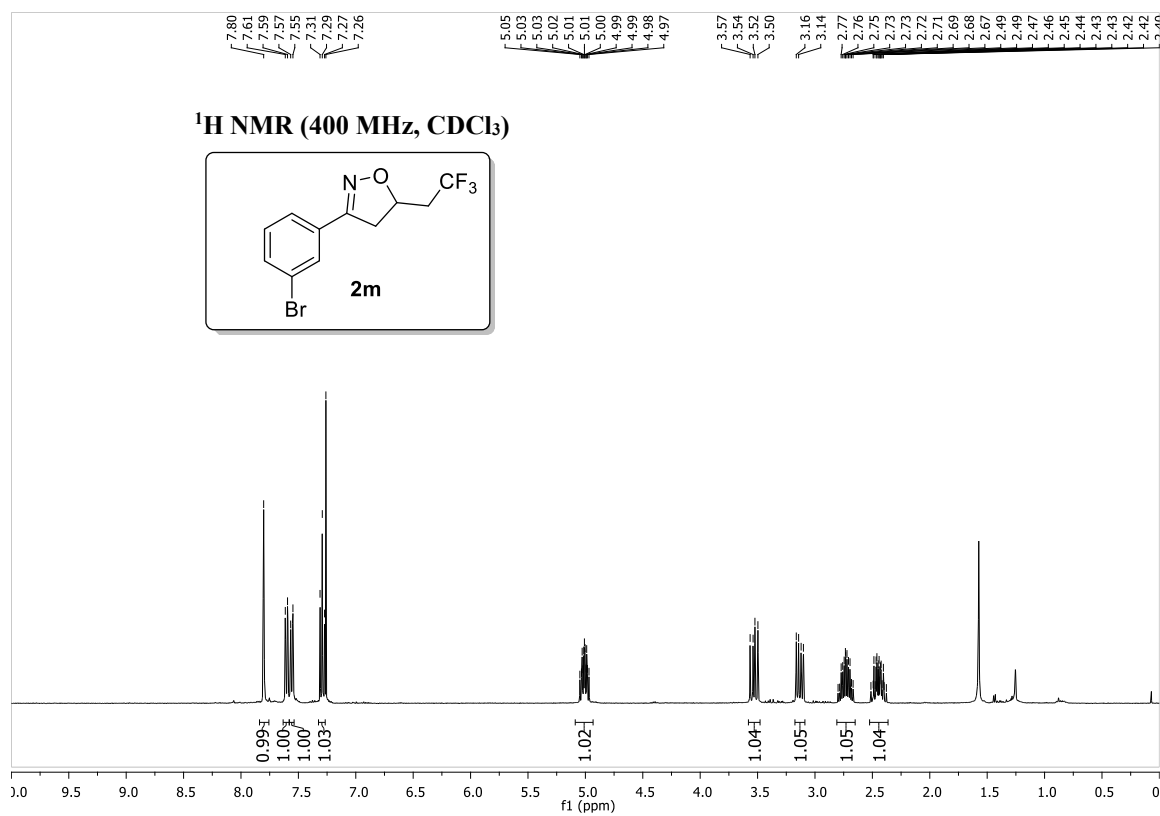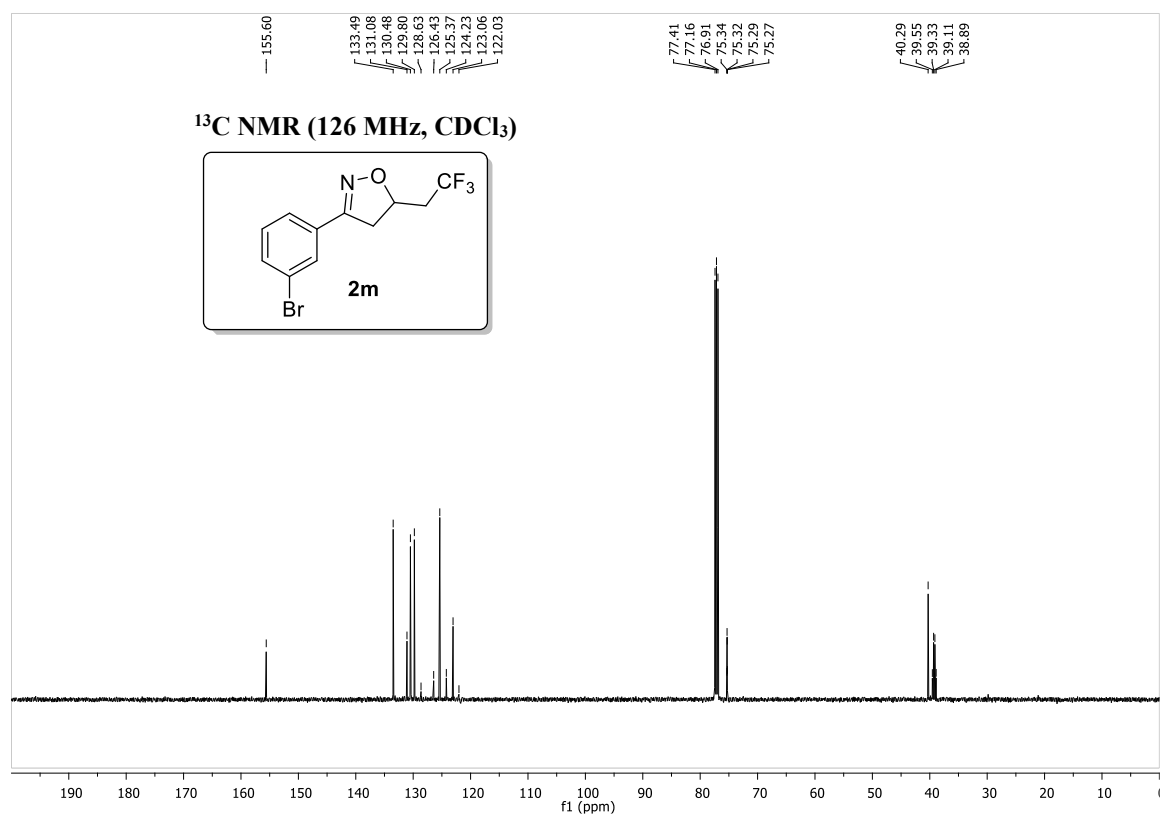

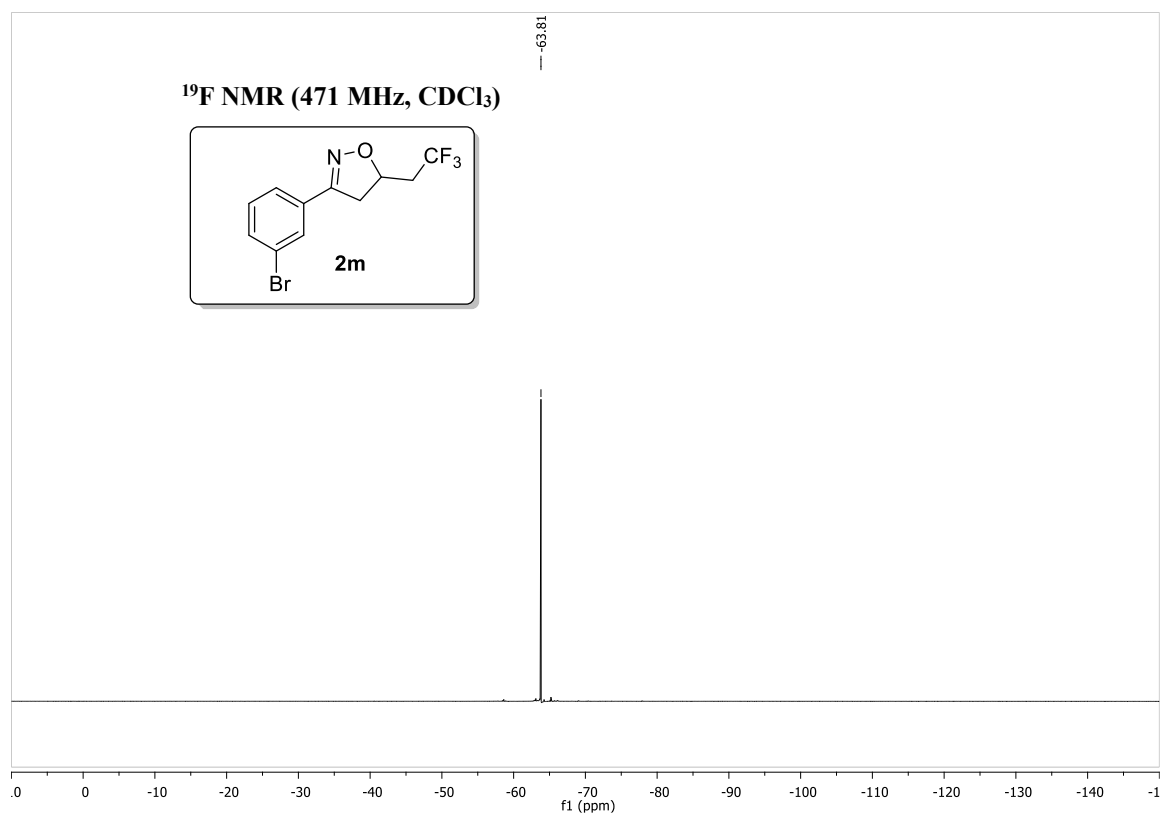

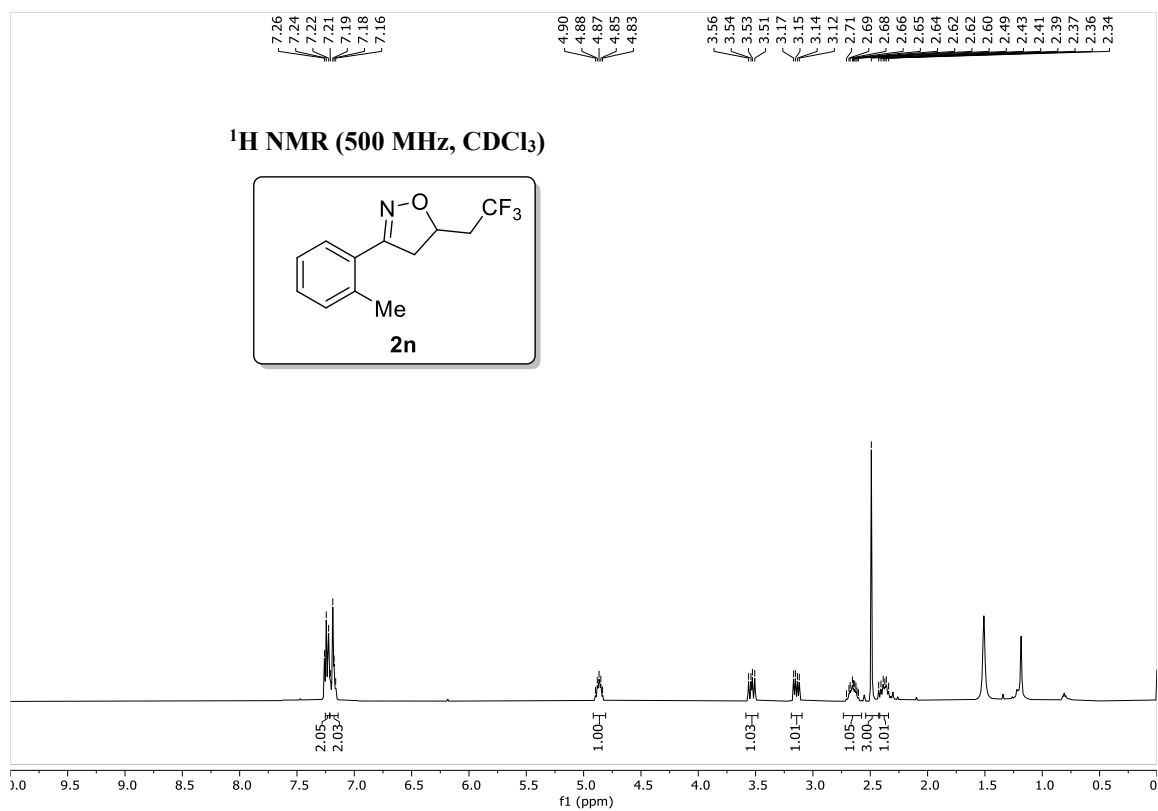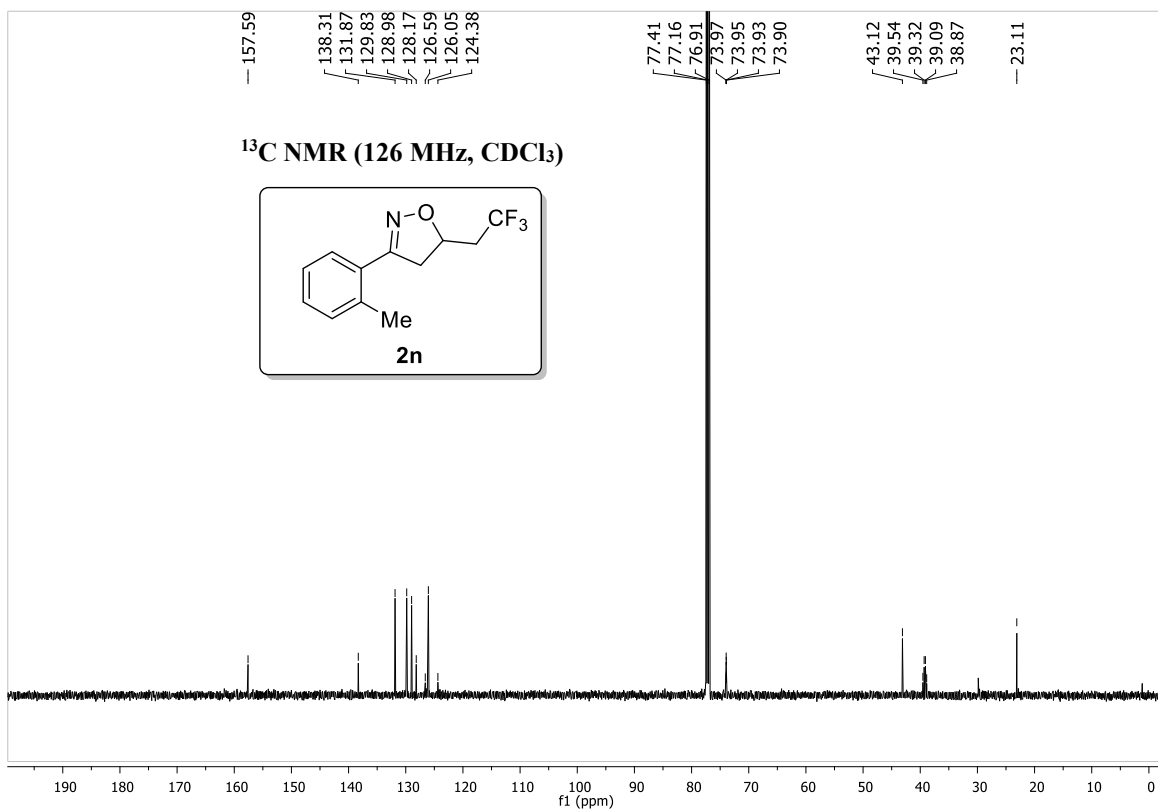

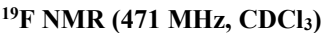 $2n$

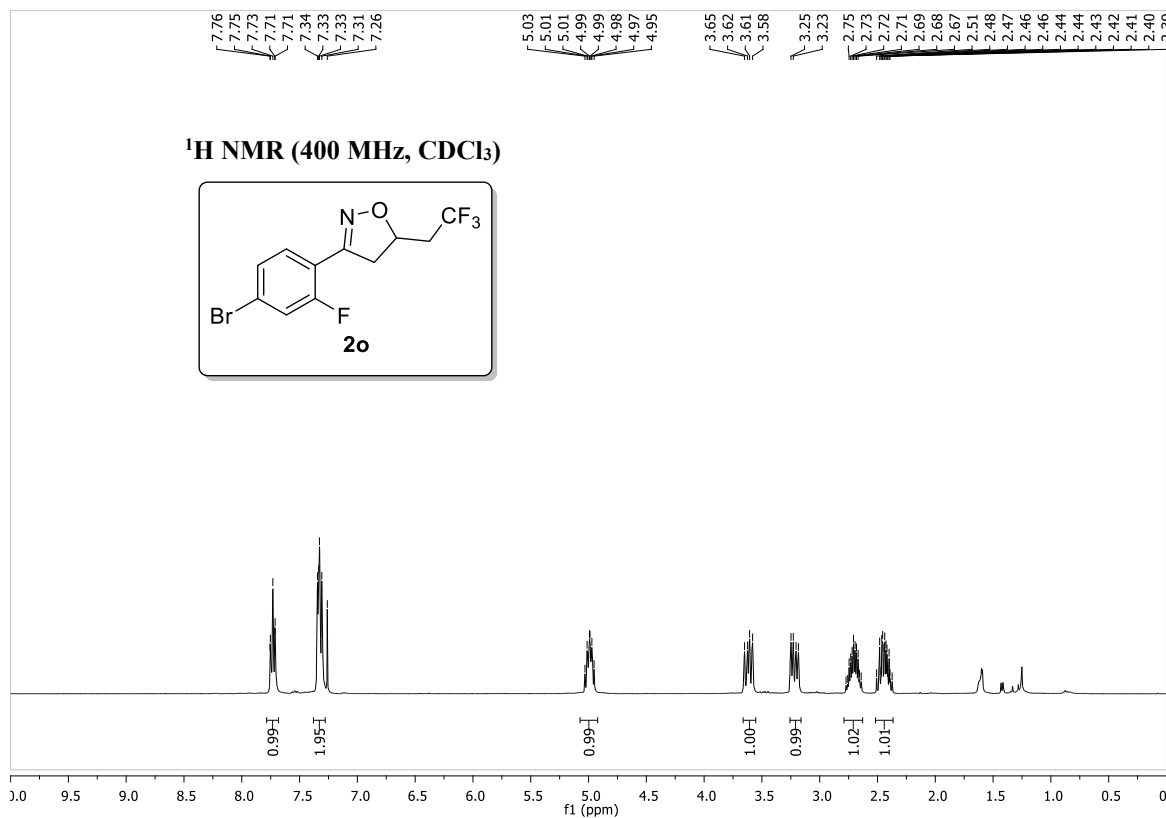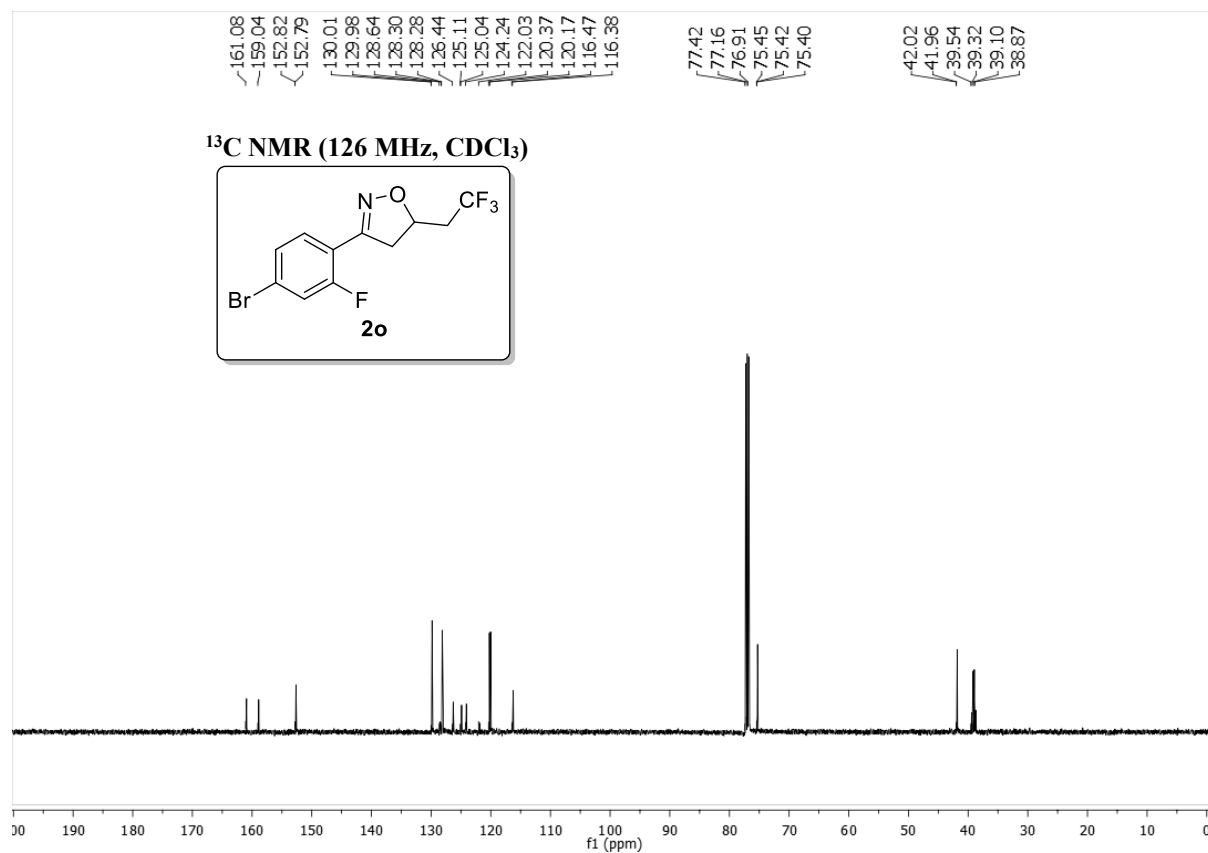

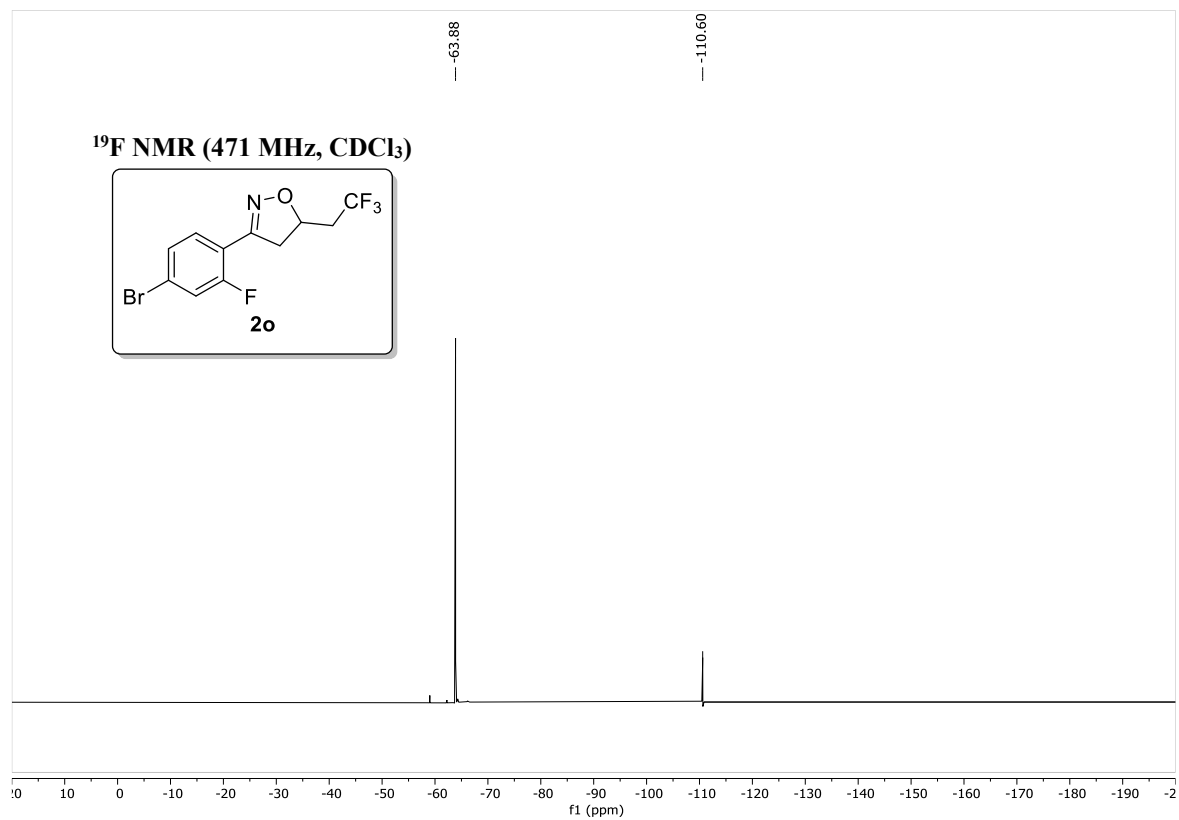

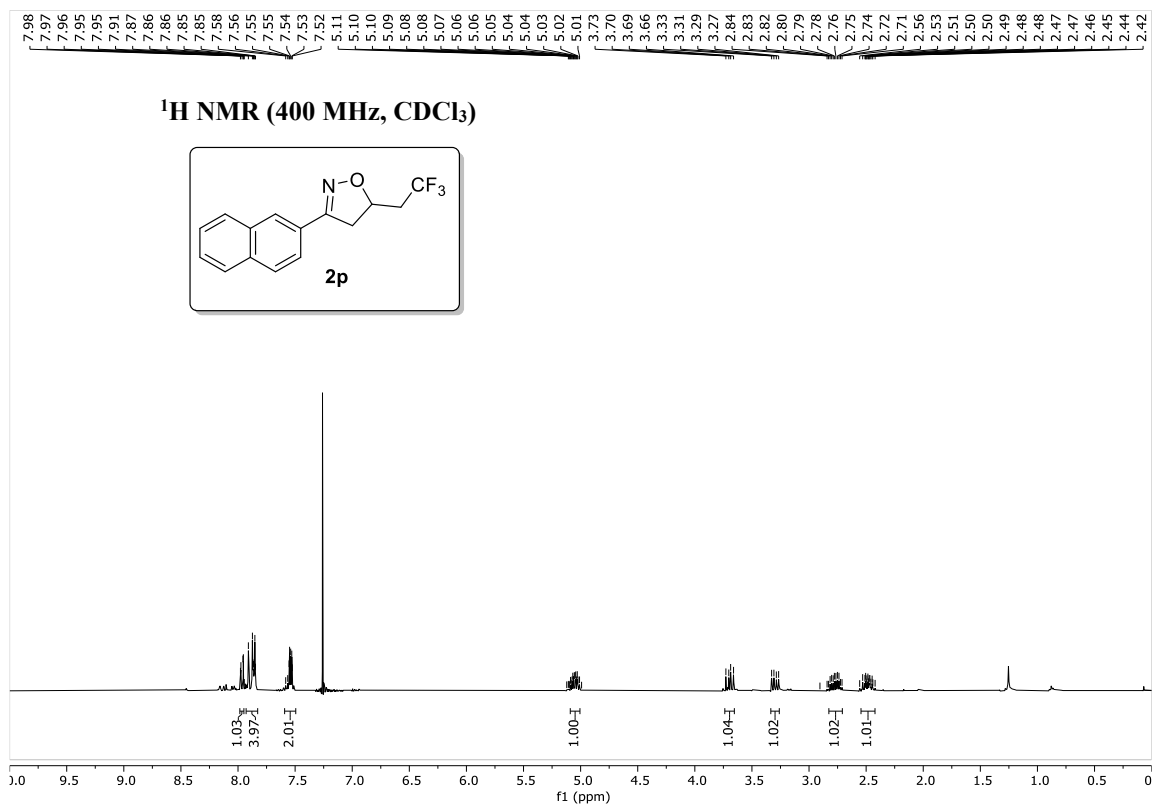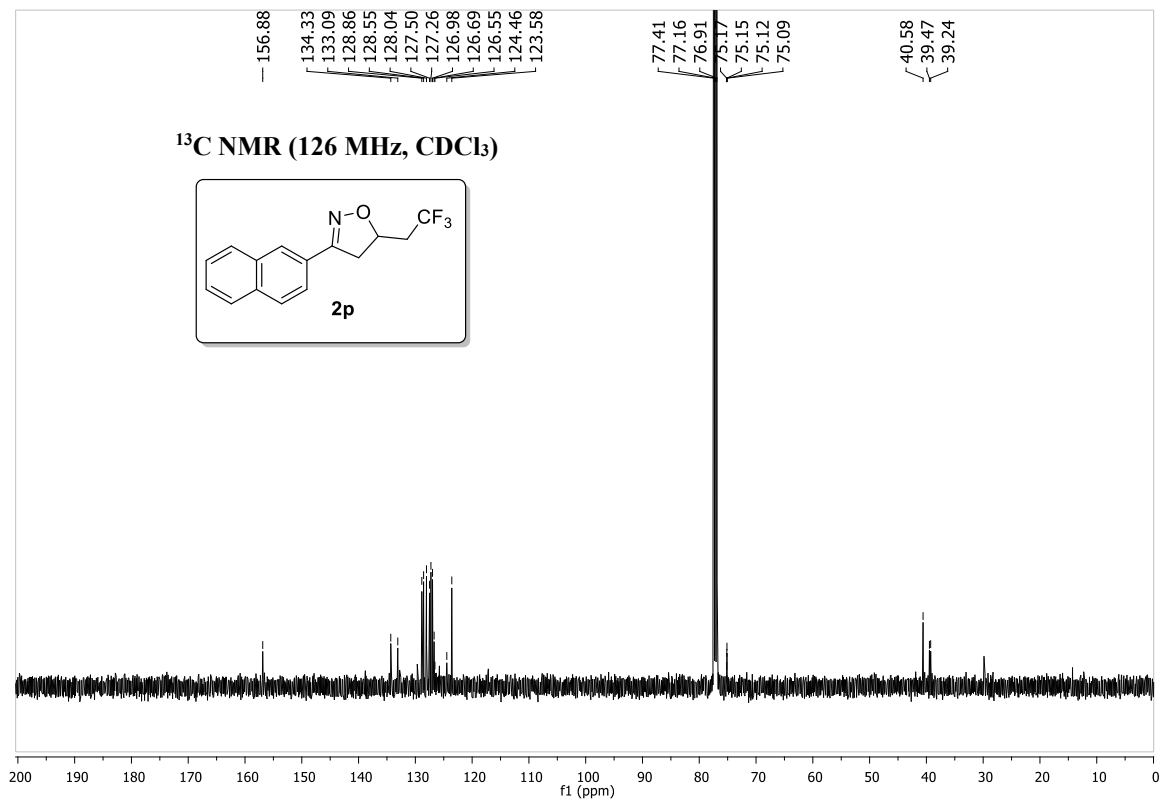

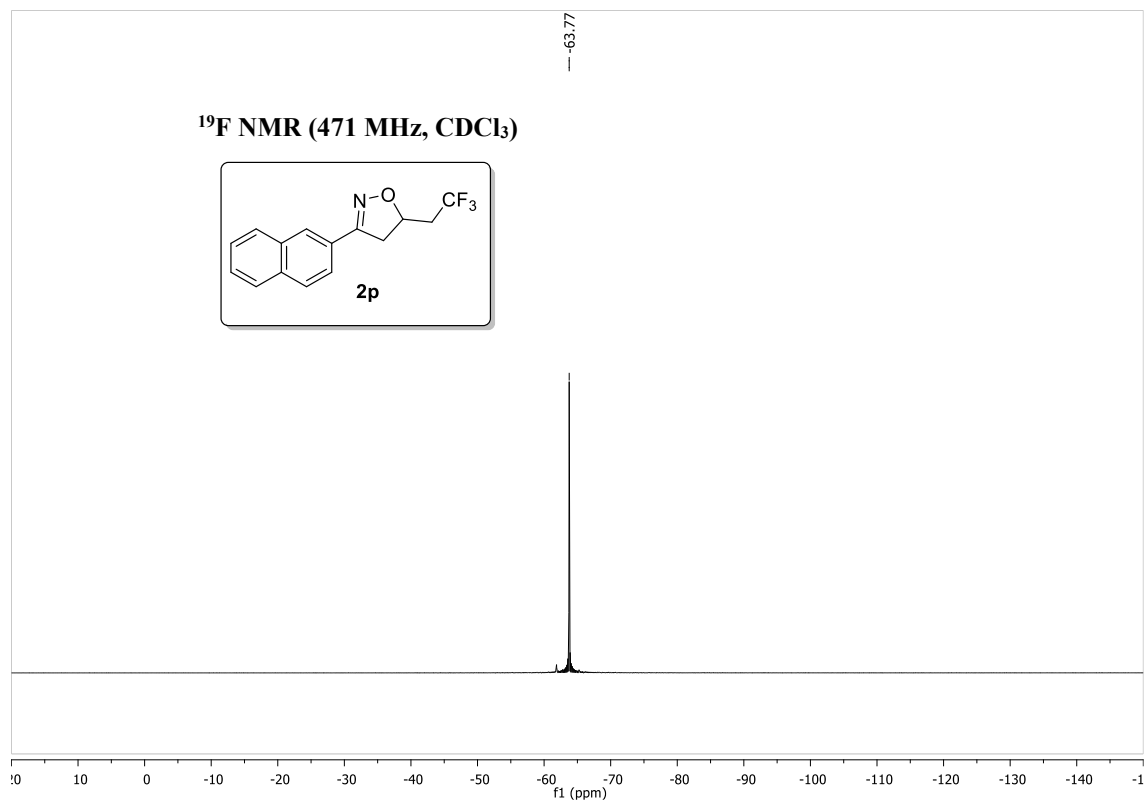

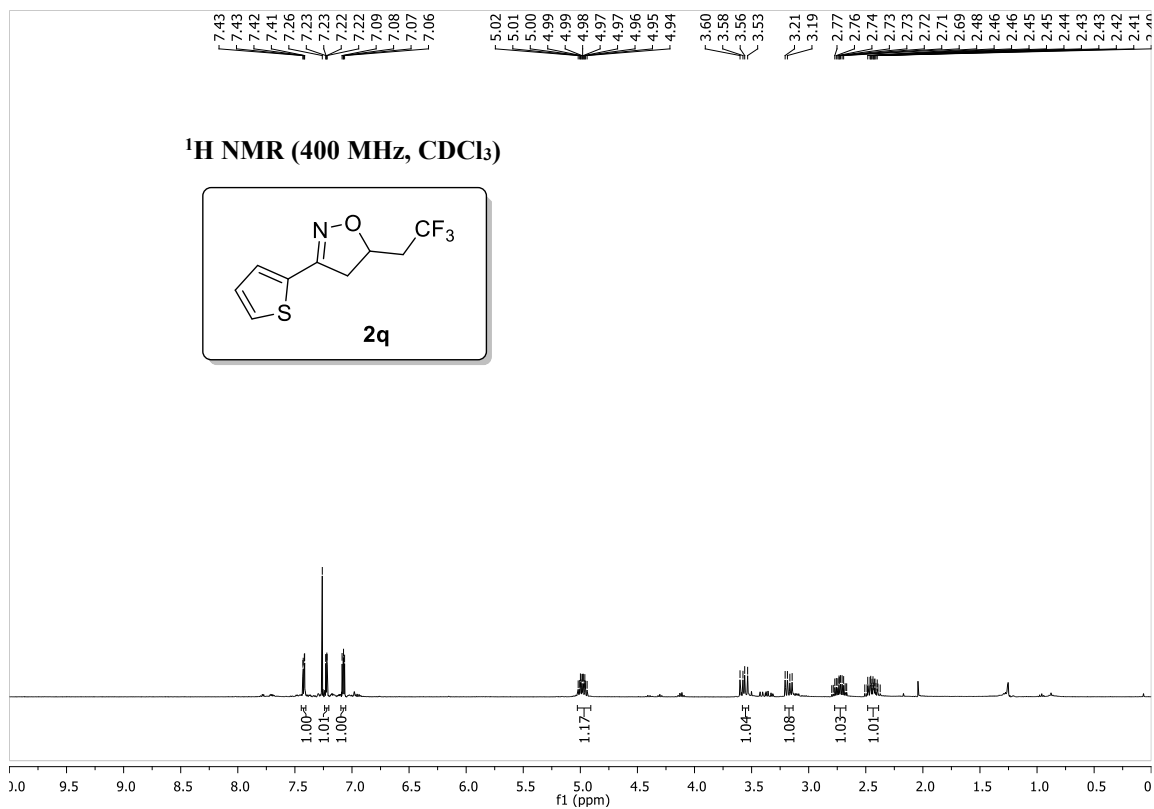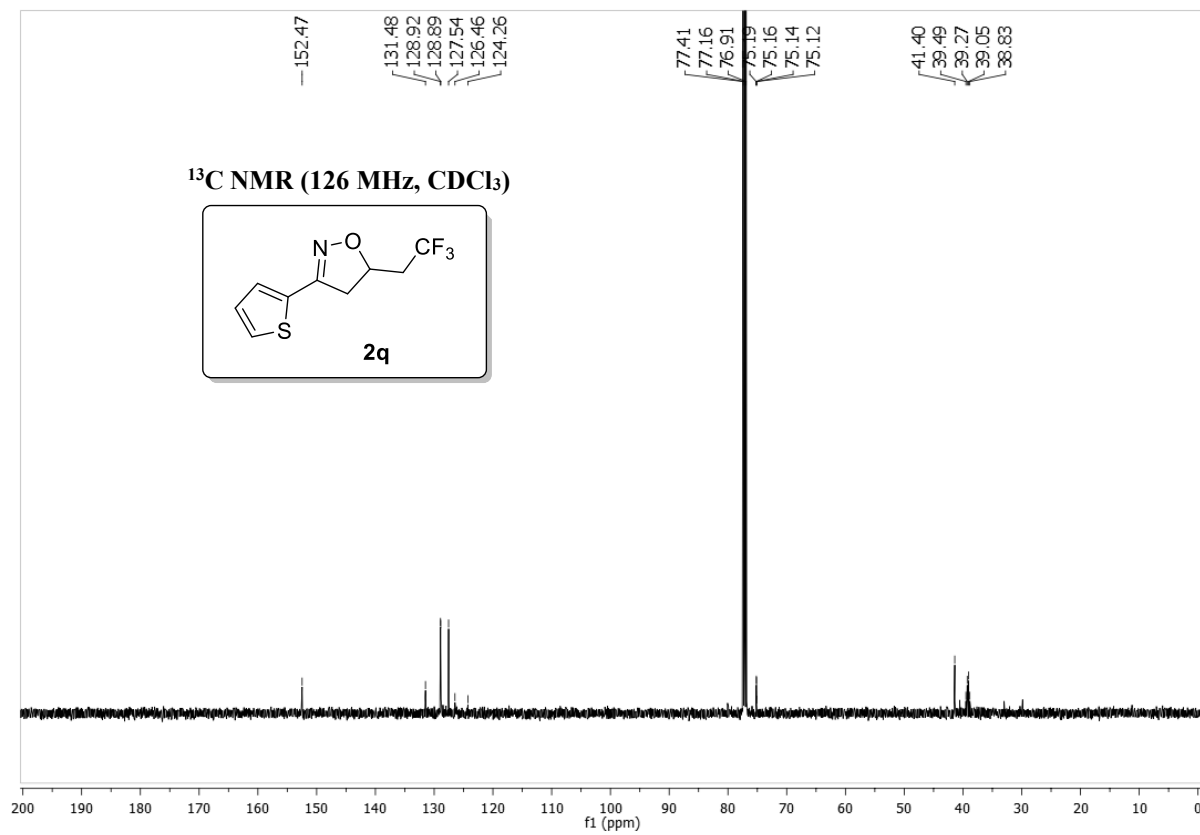

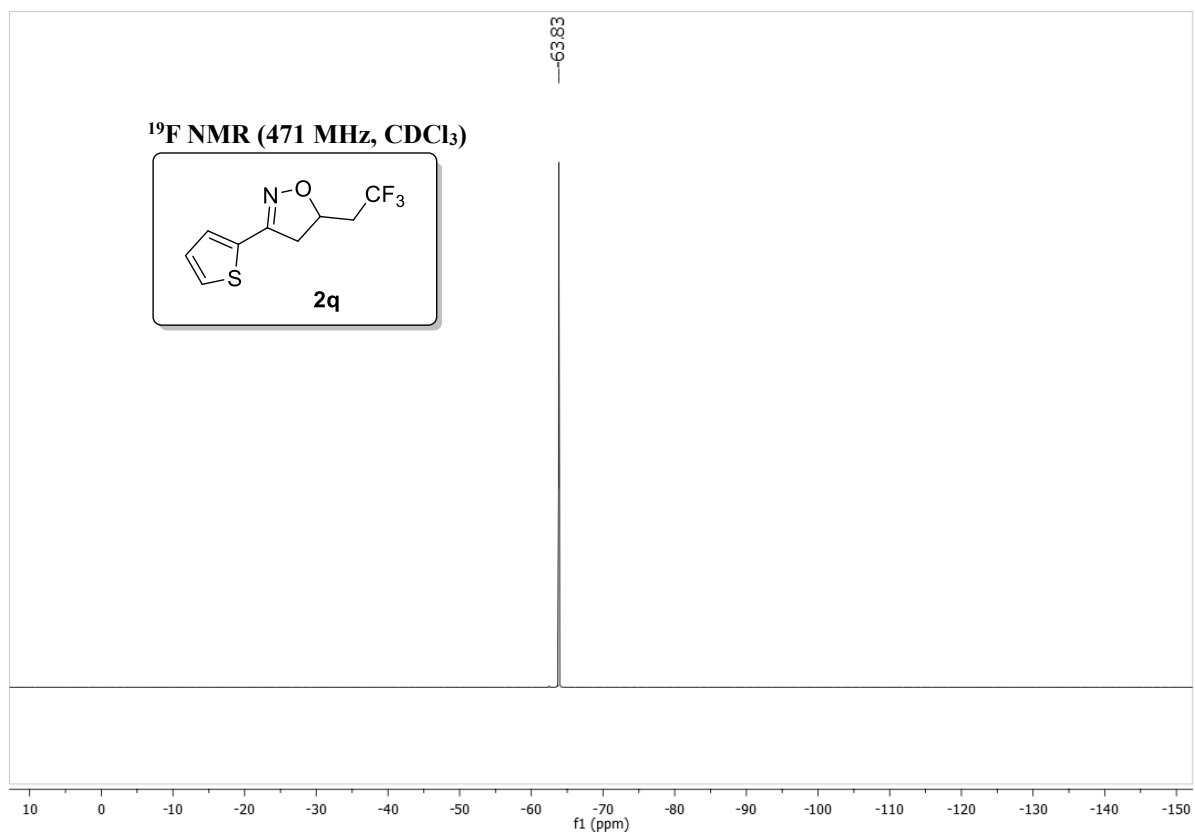

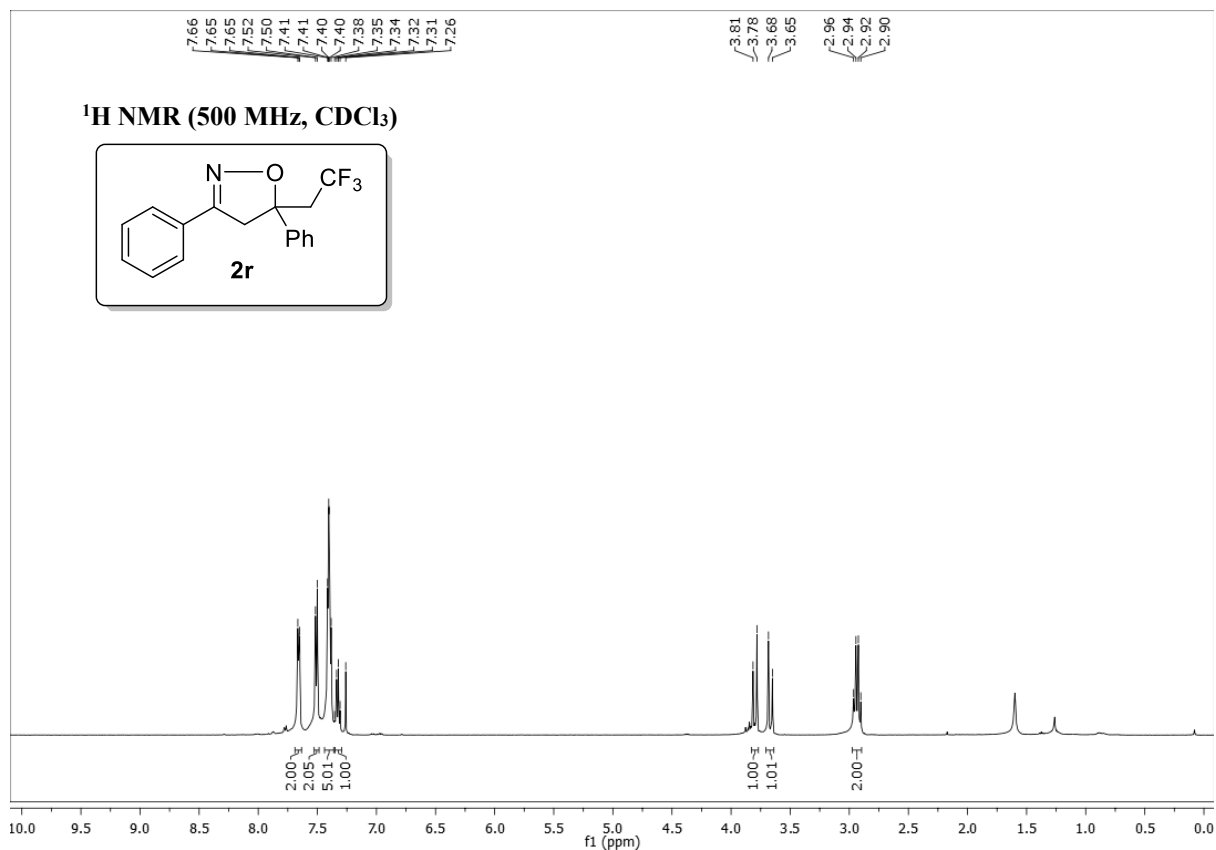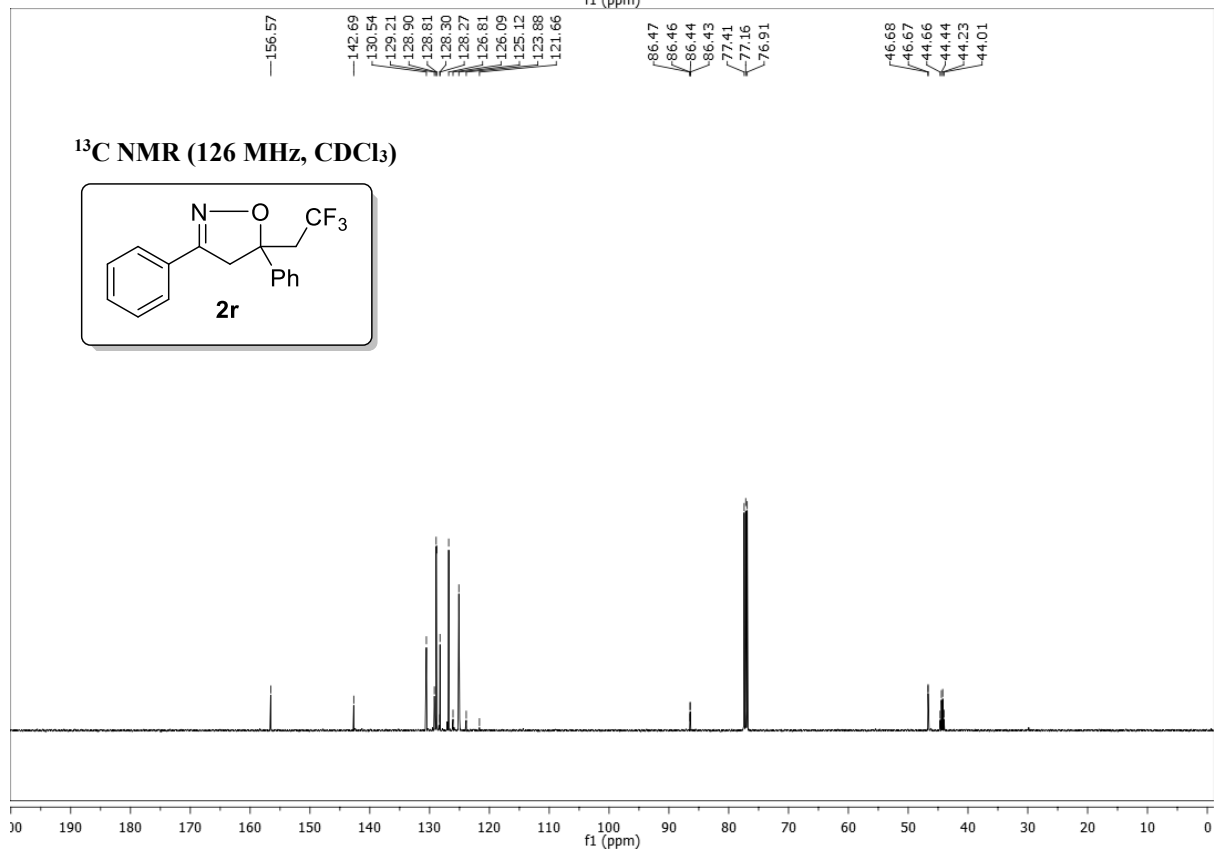

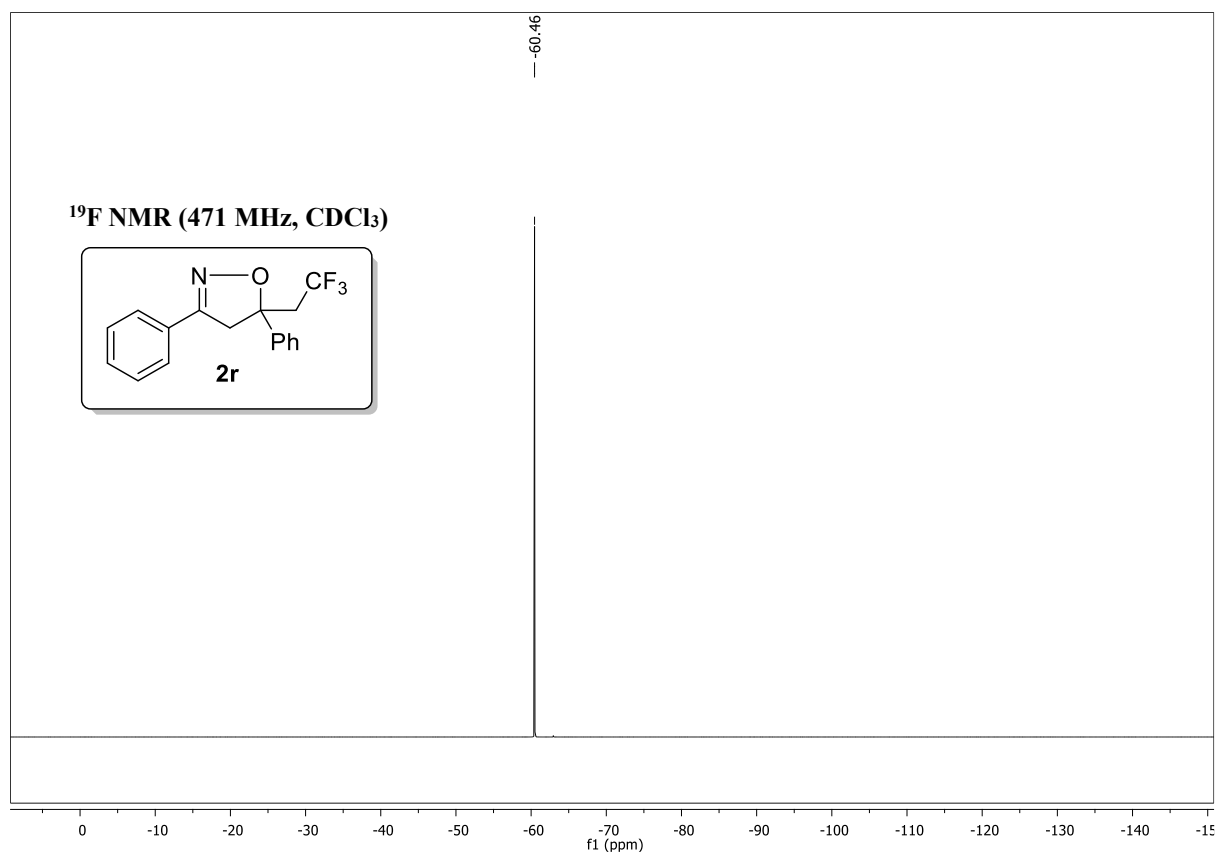

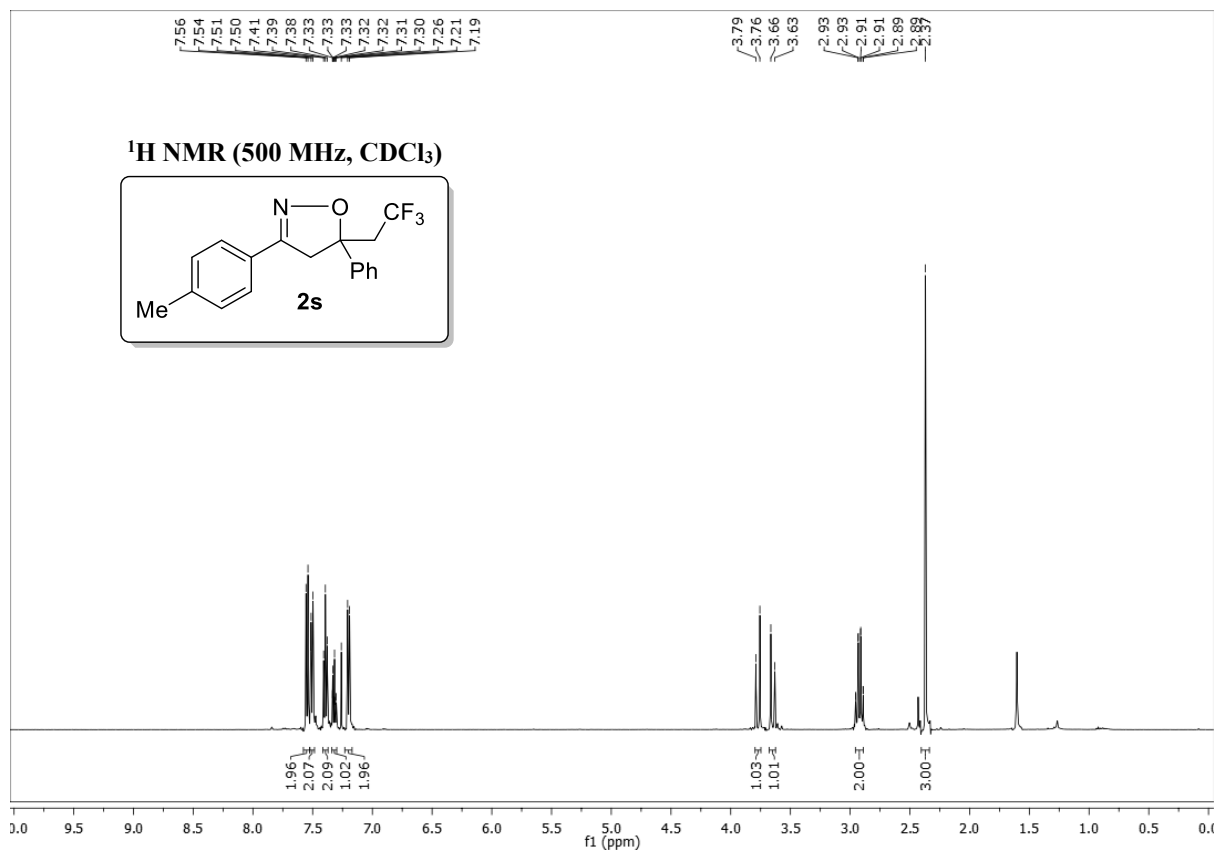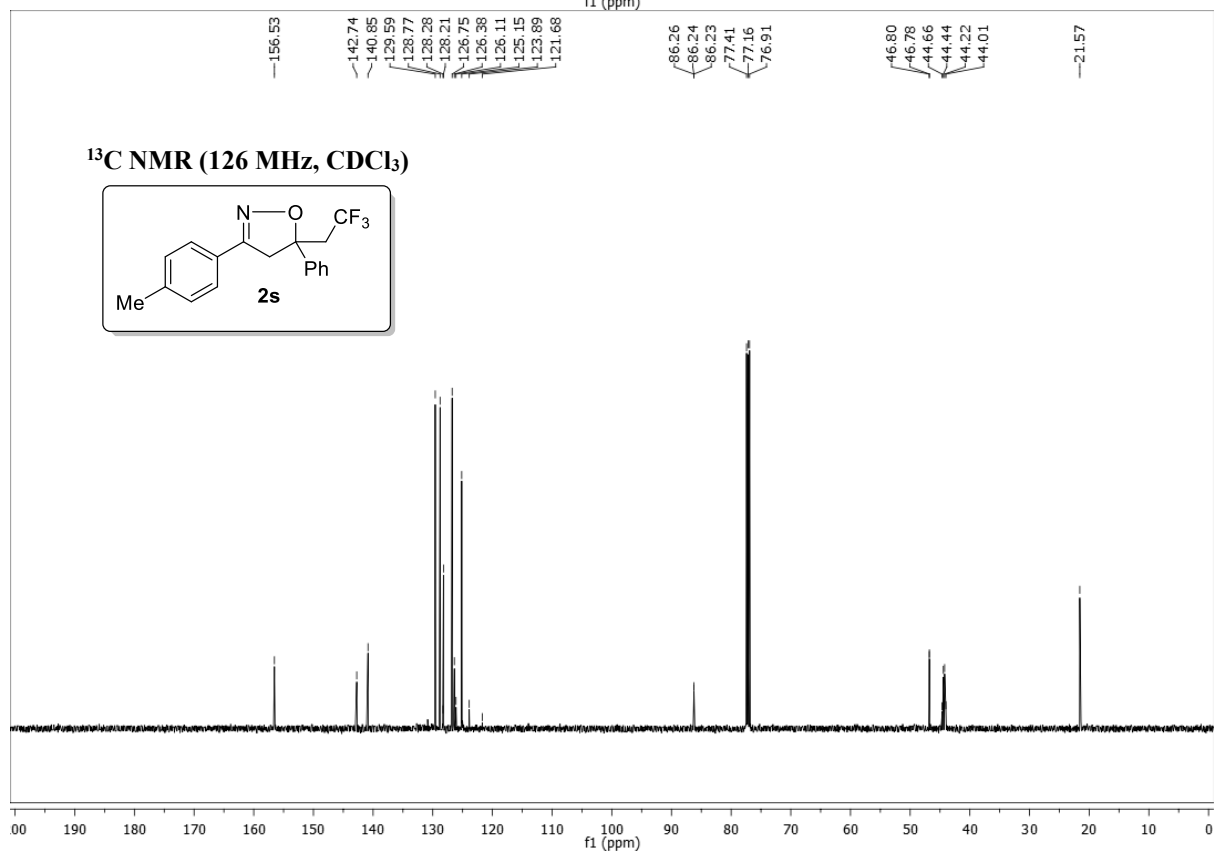

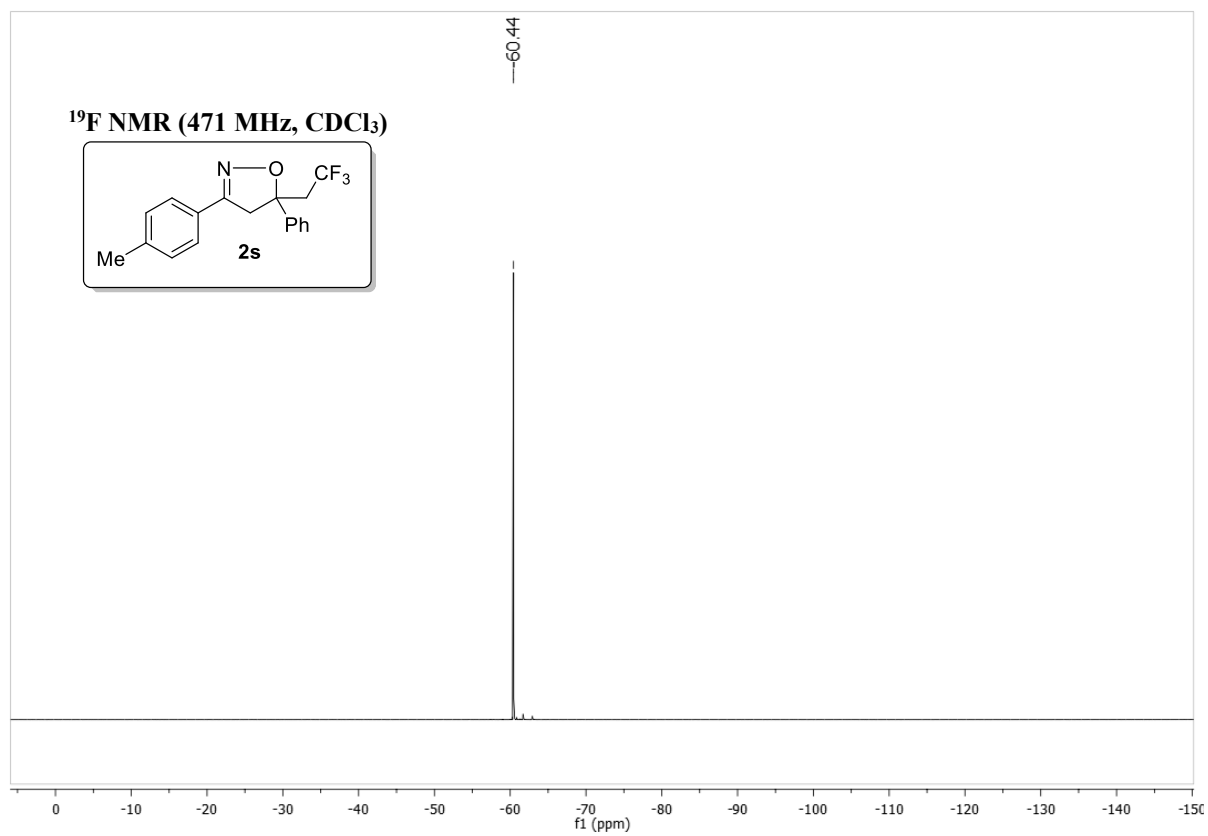

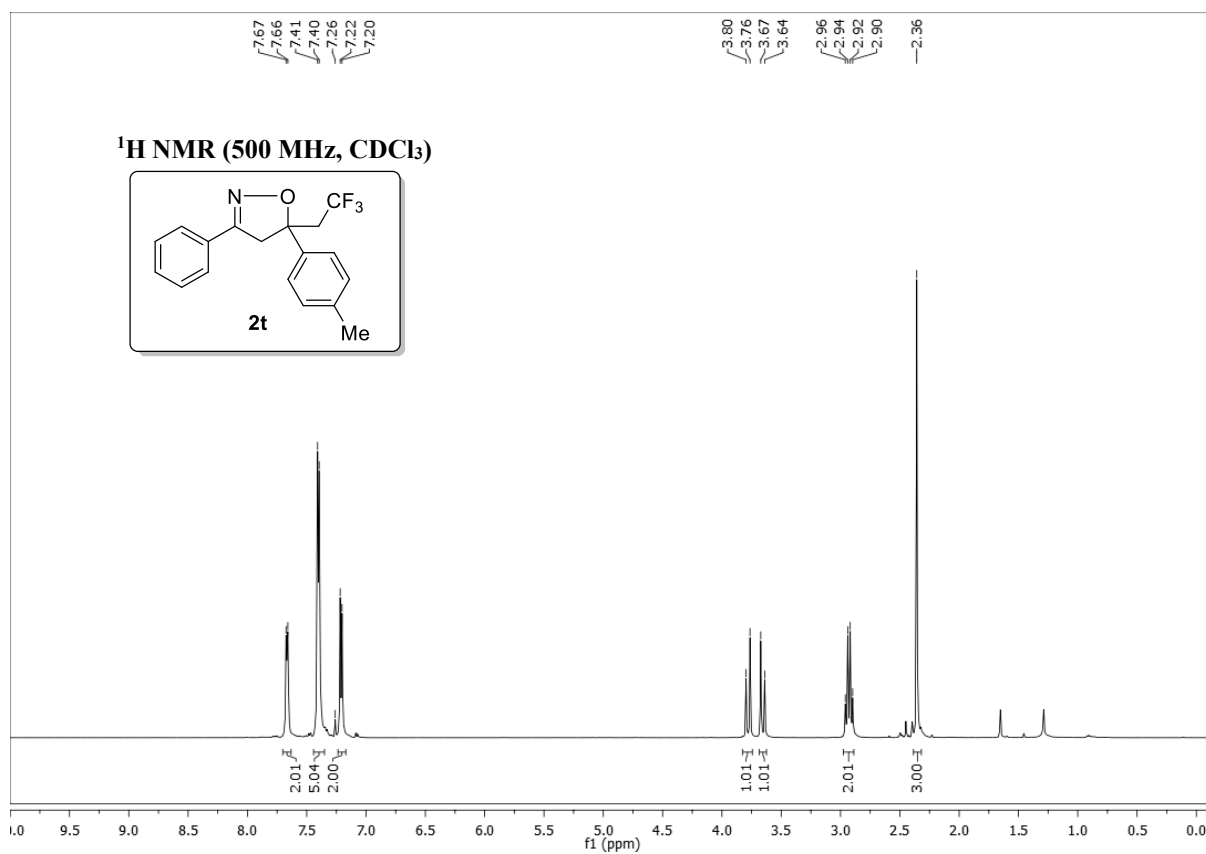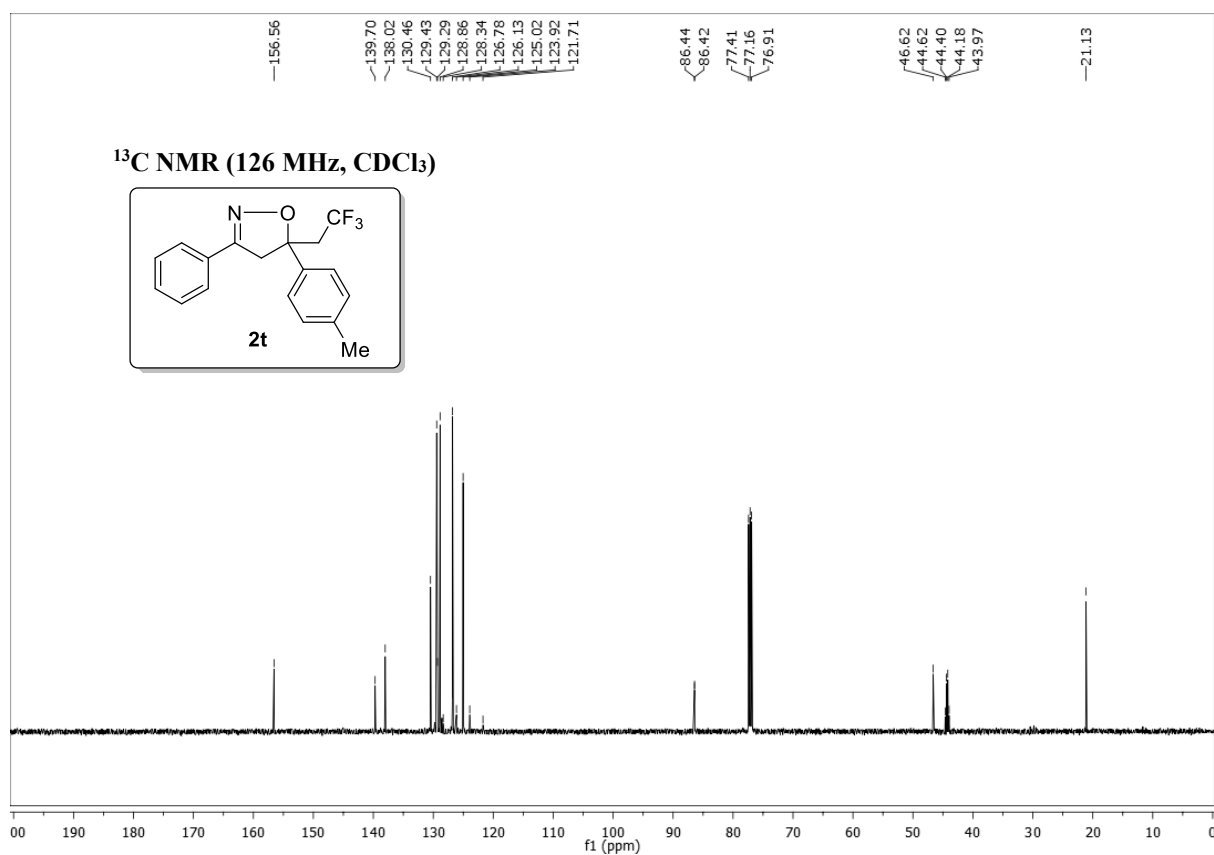

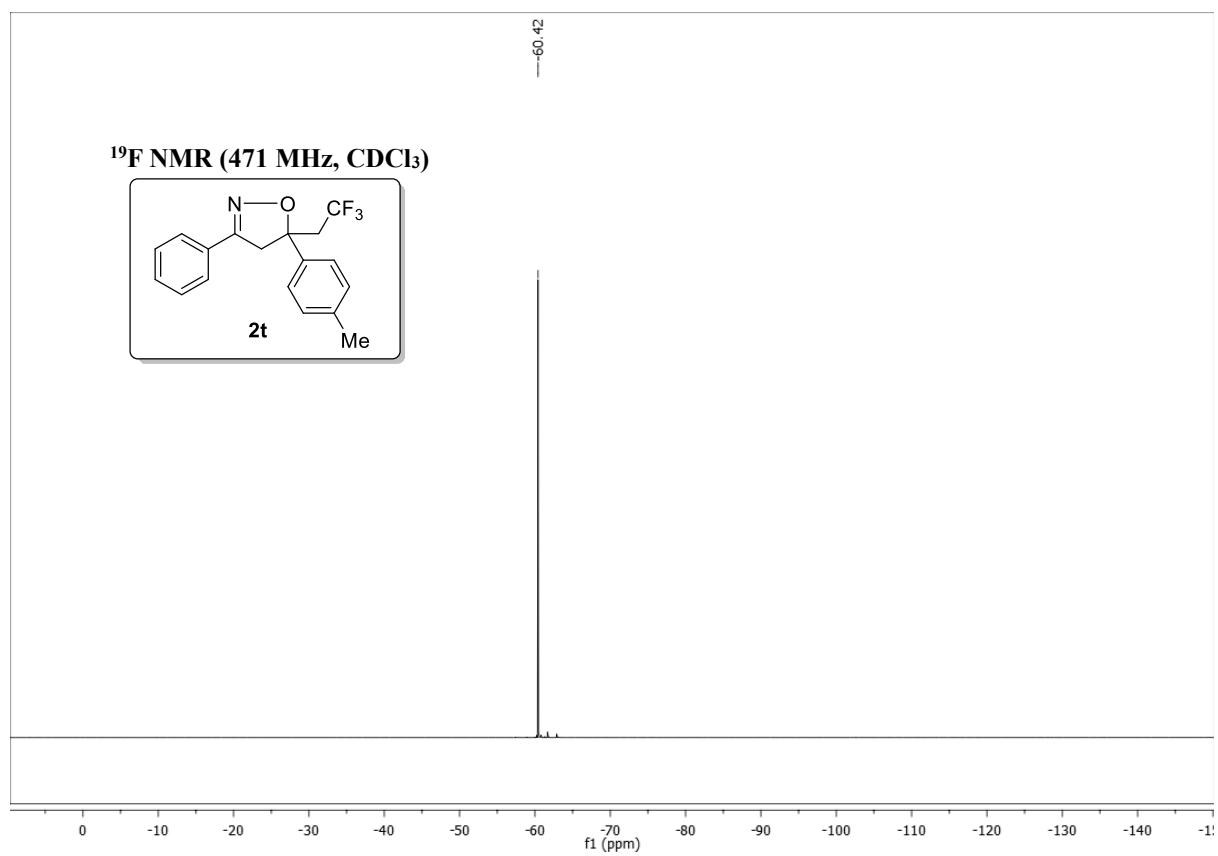

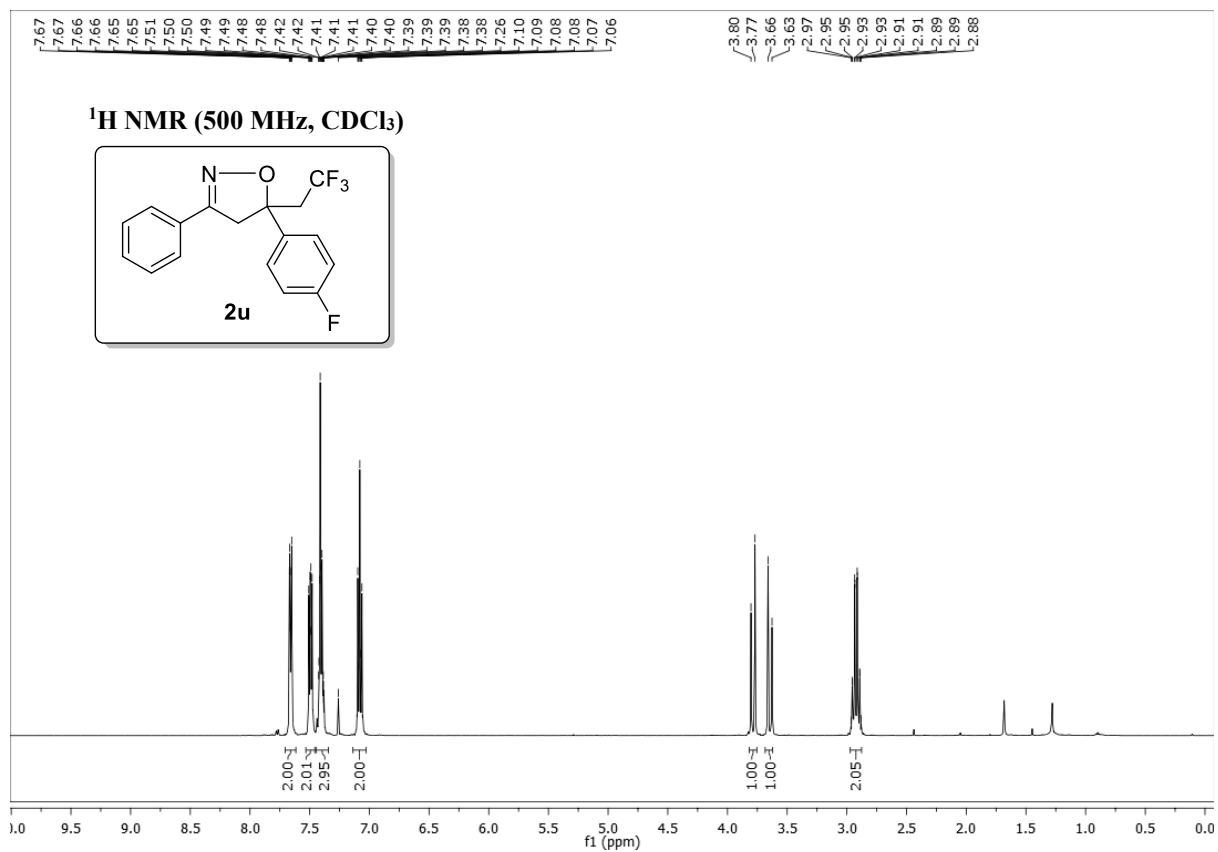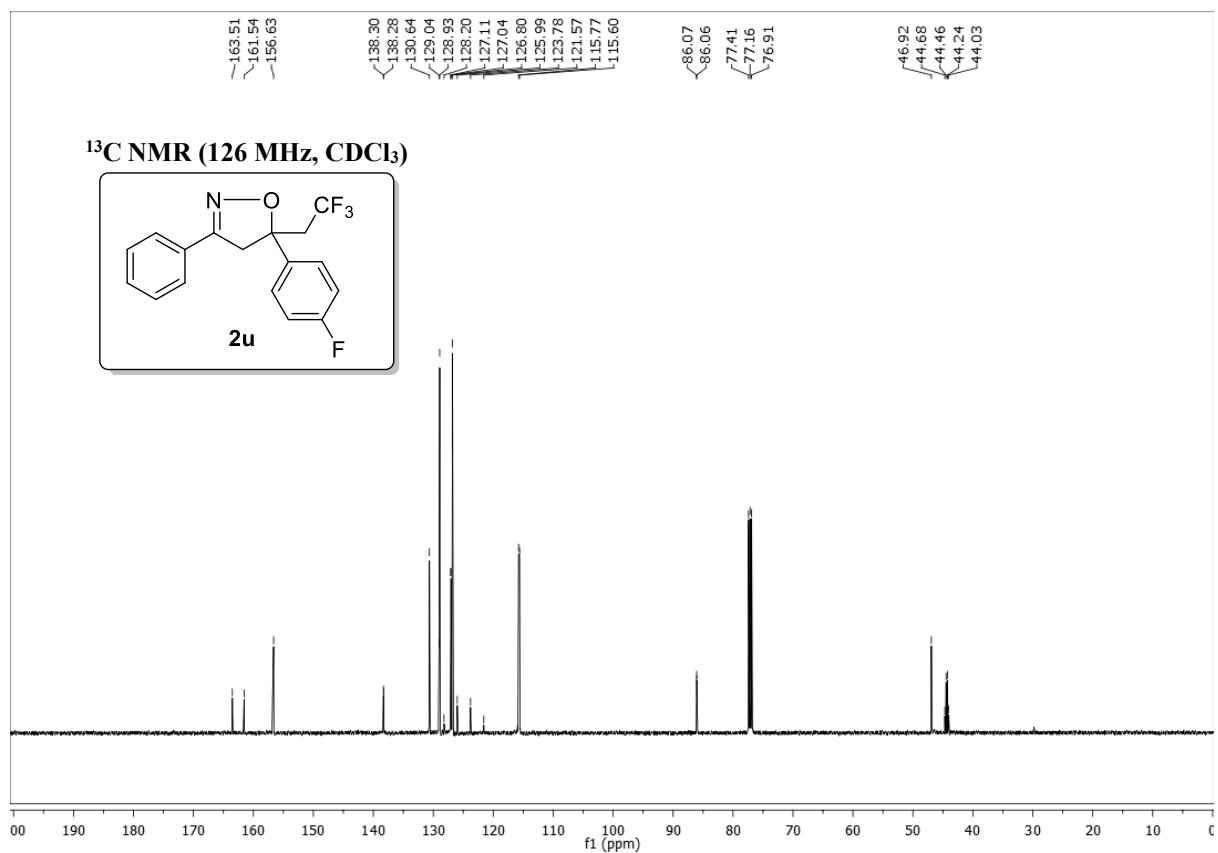

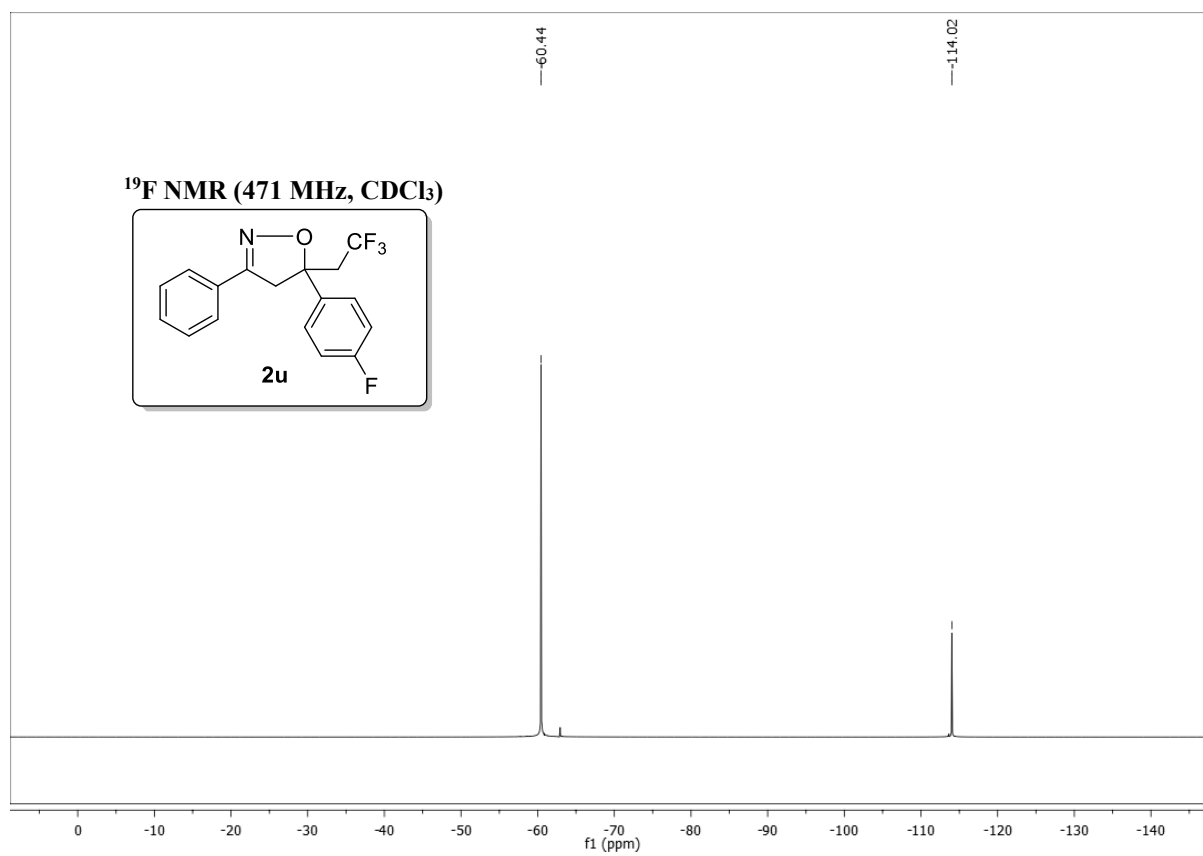

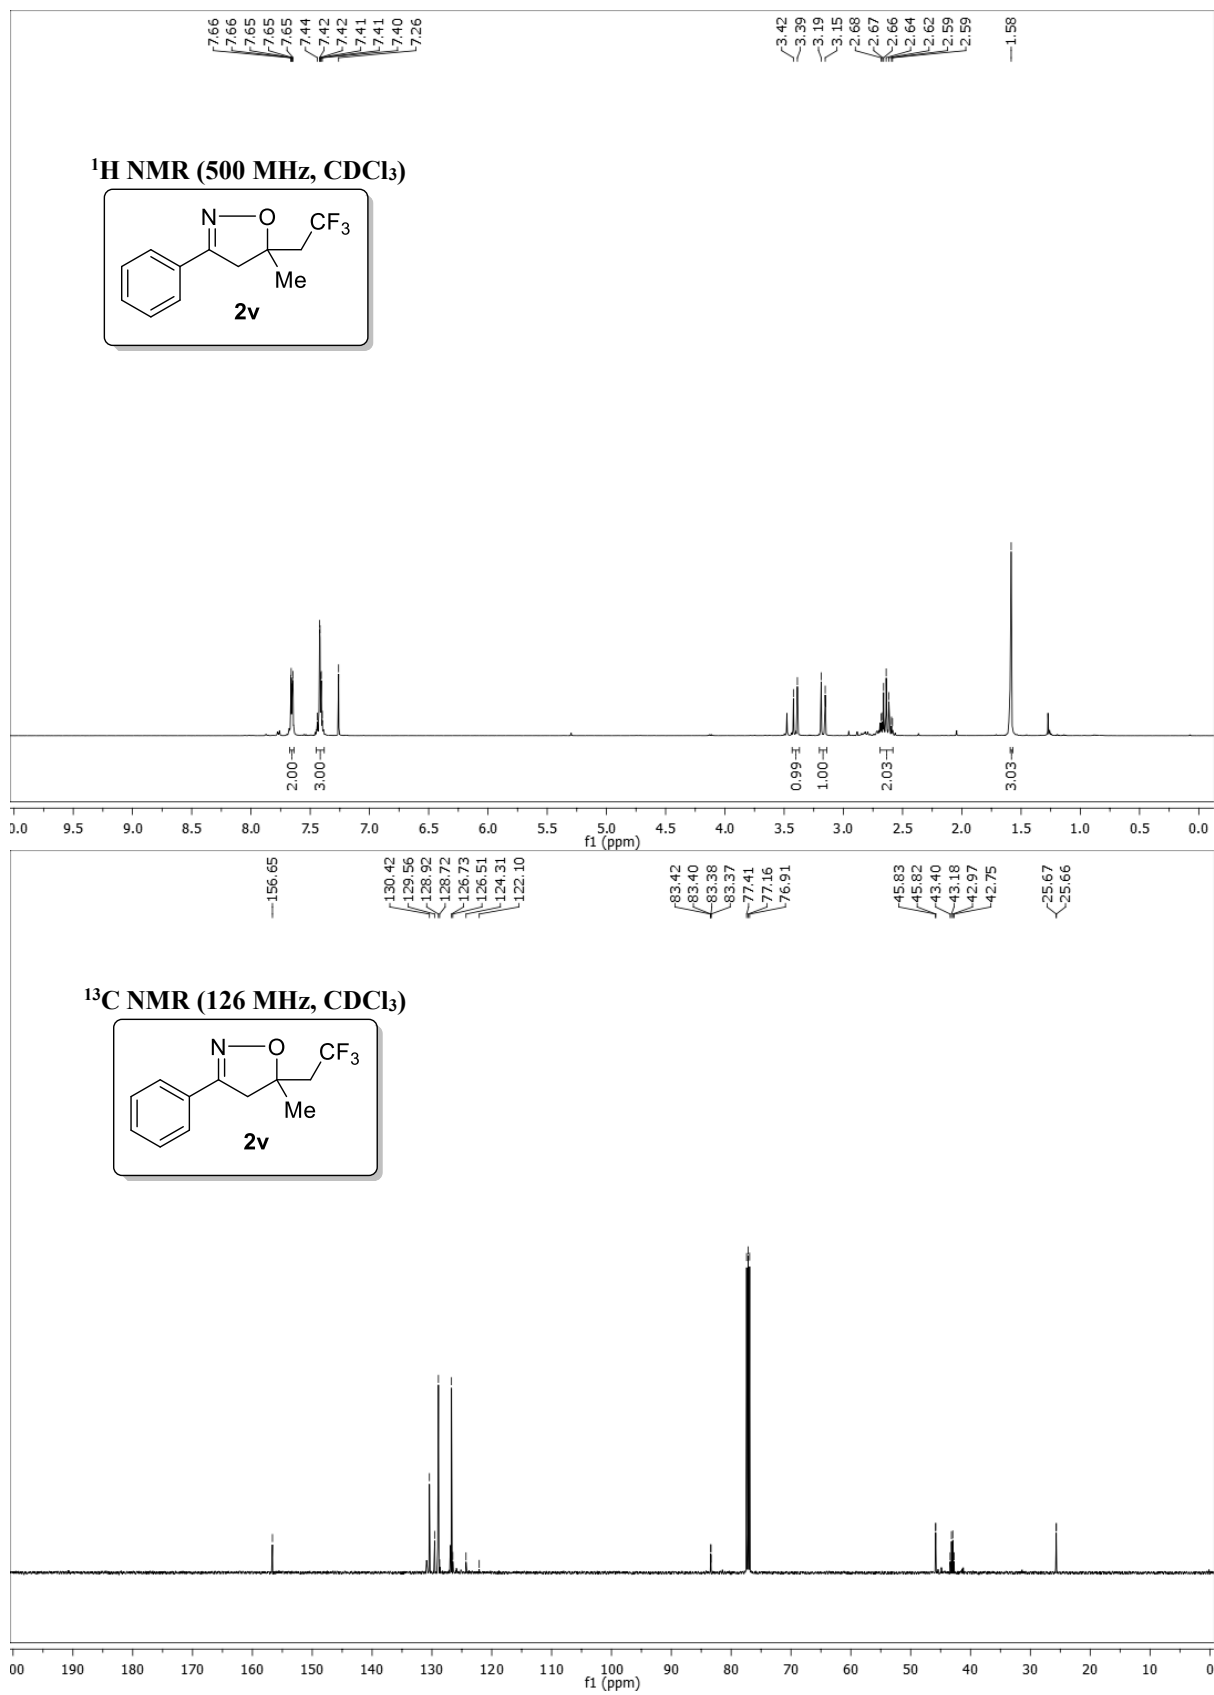

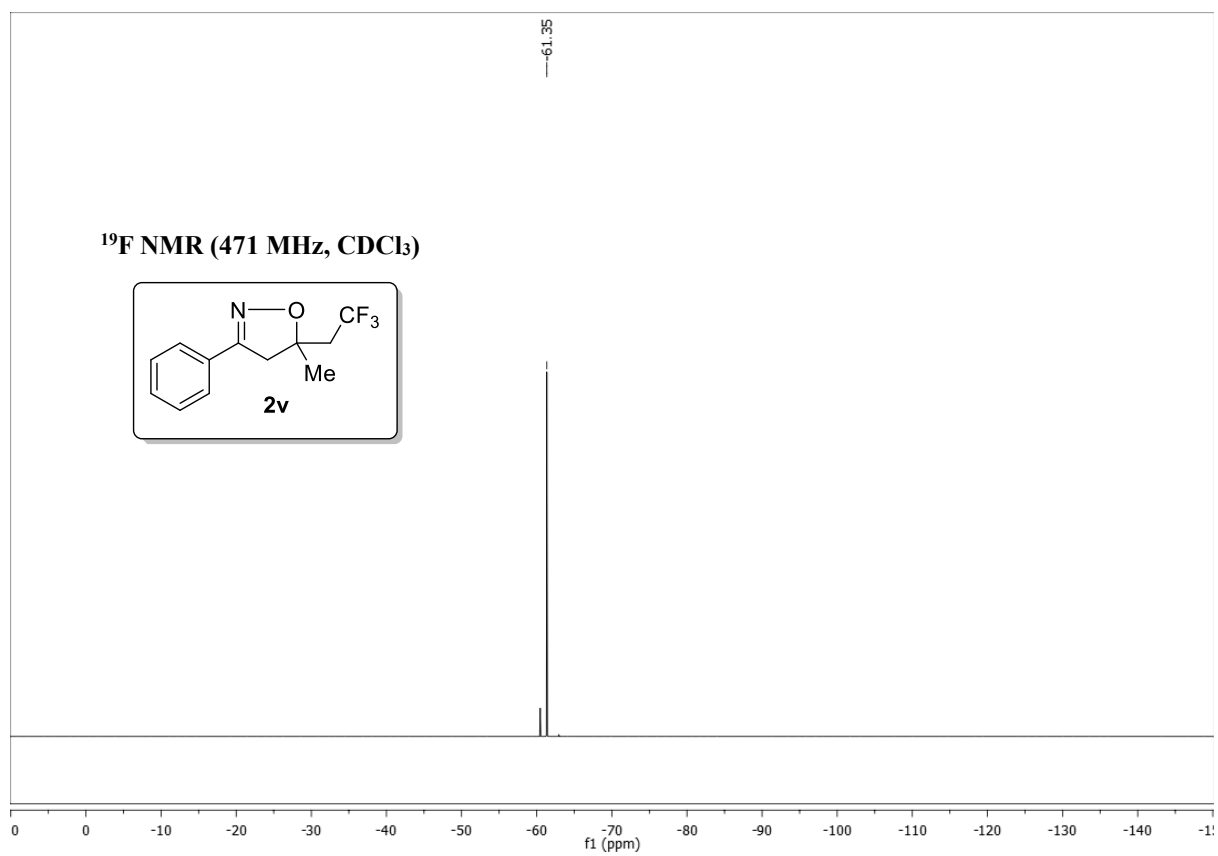

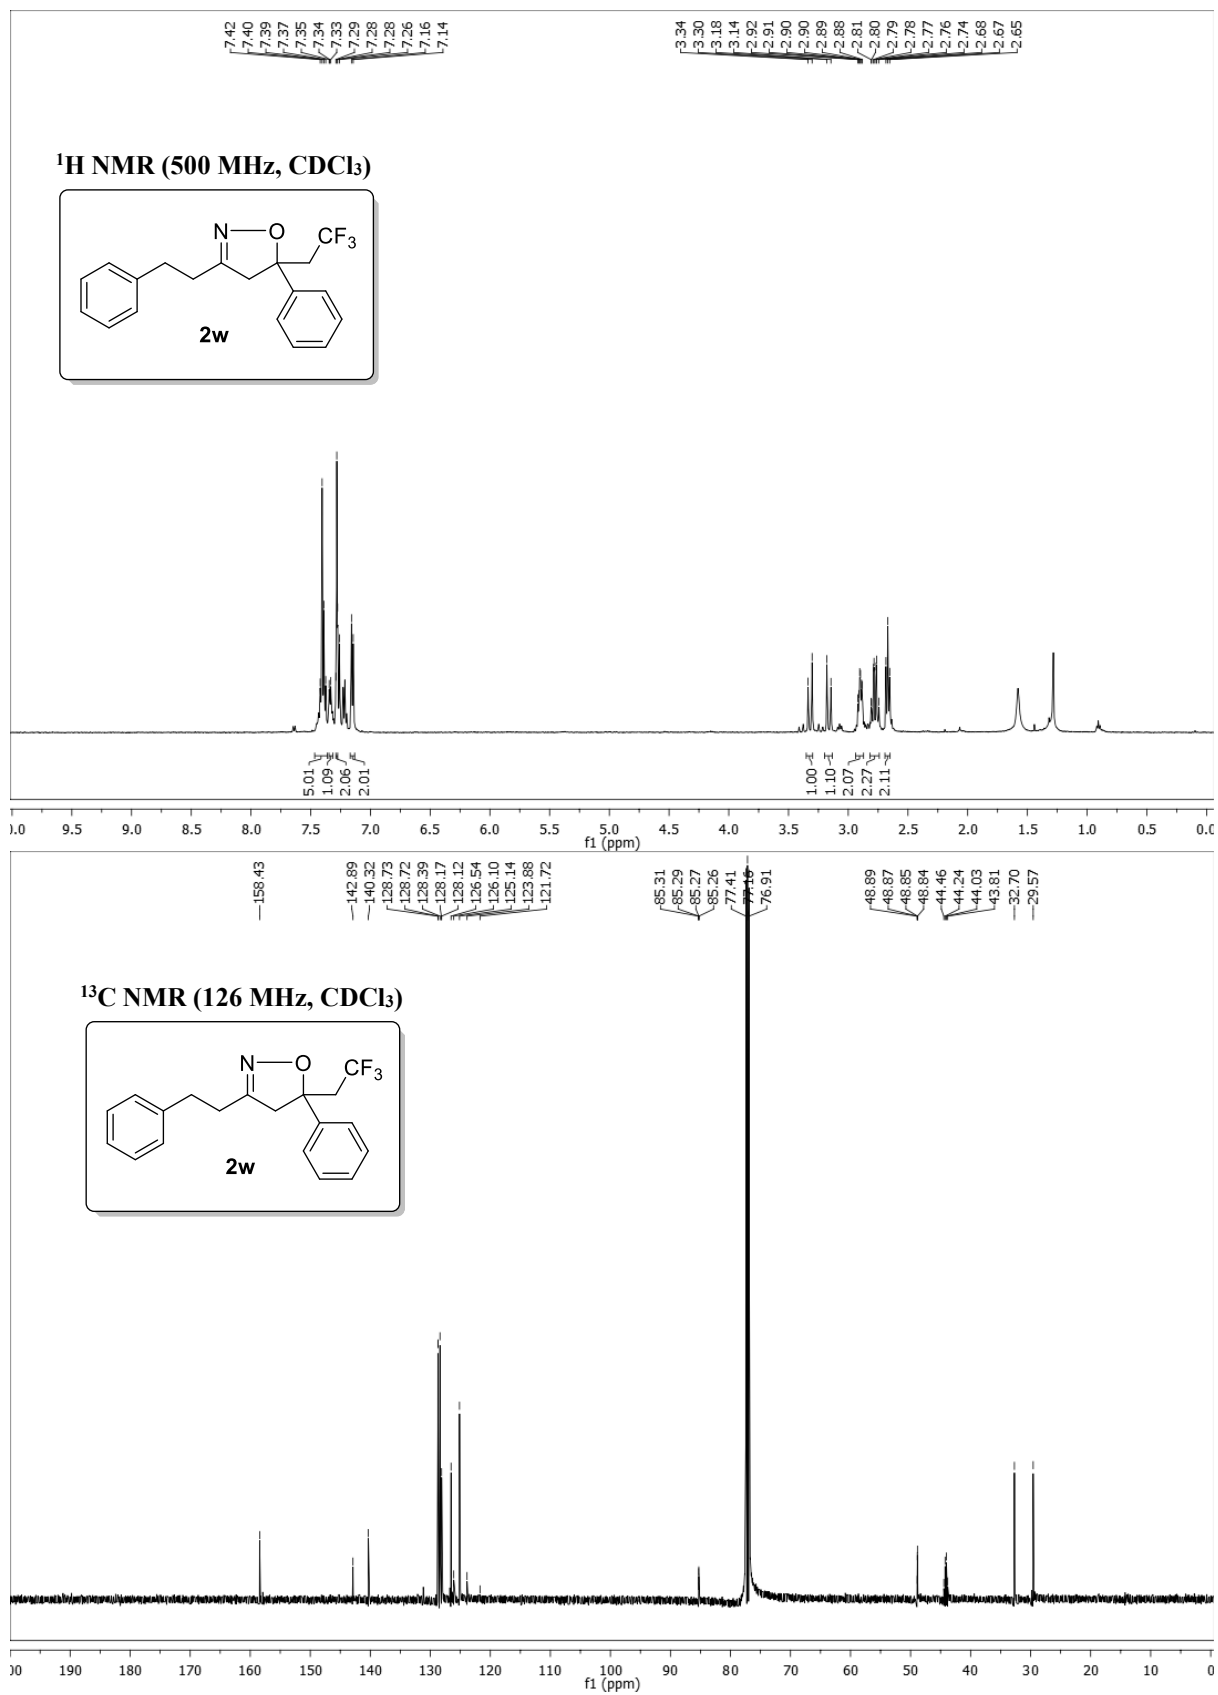

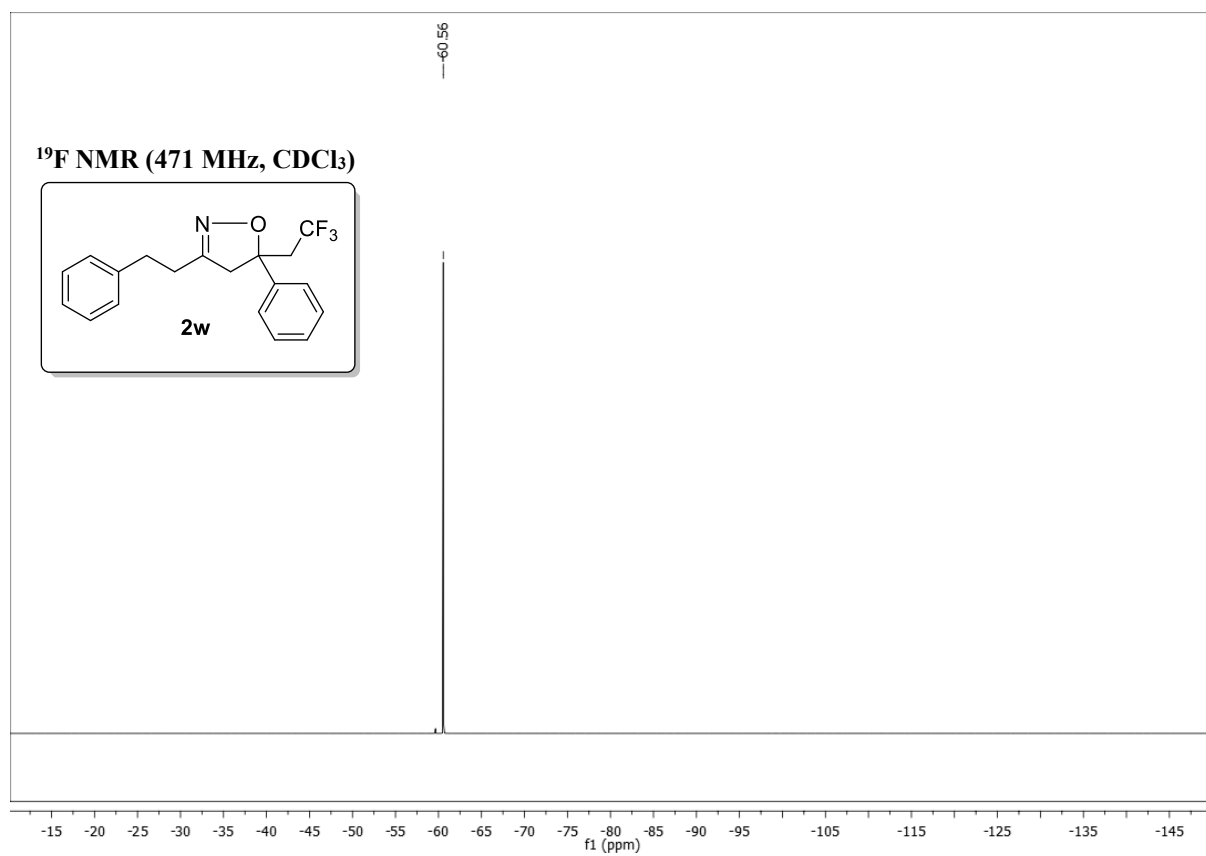

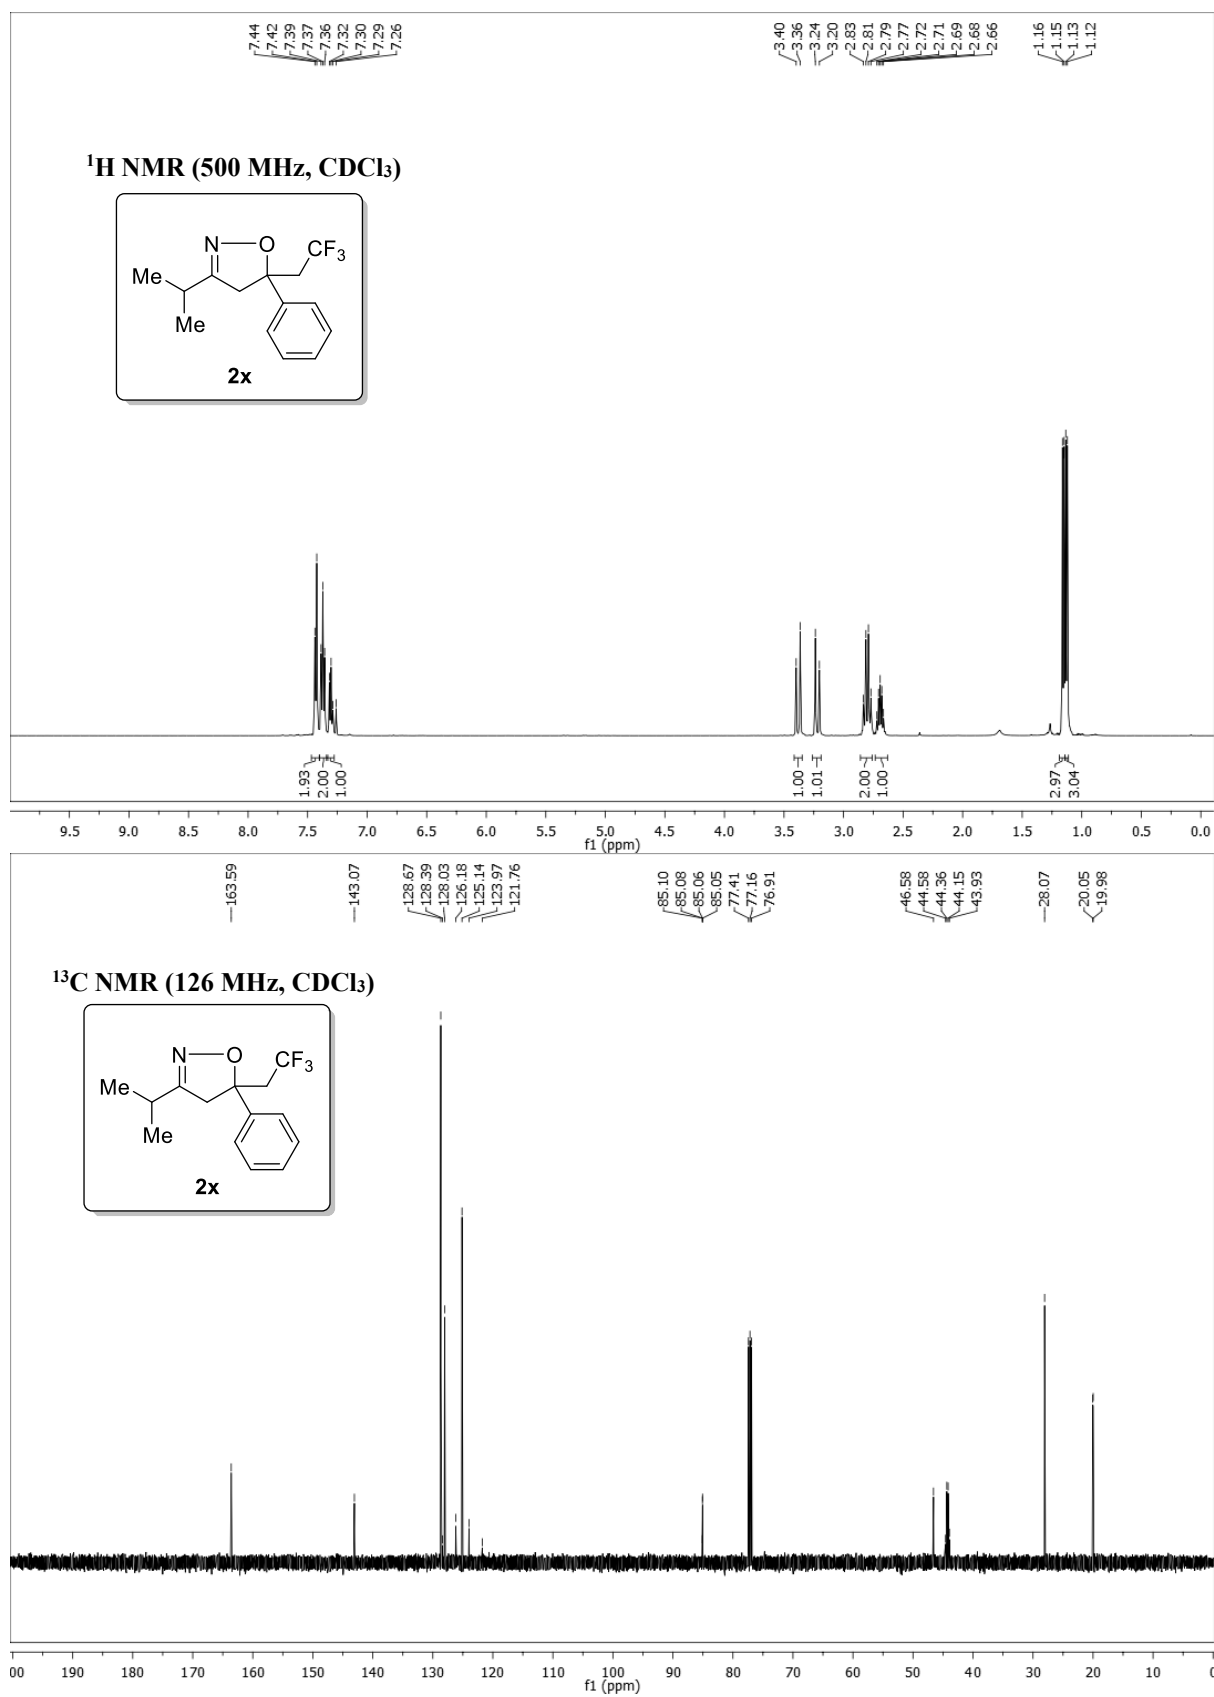

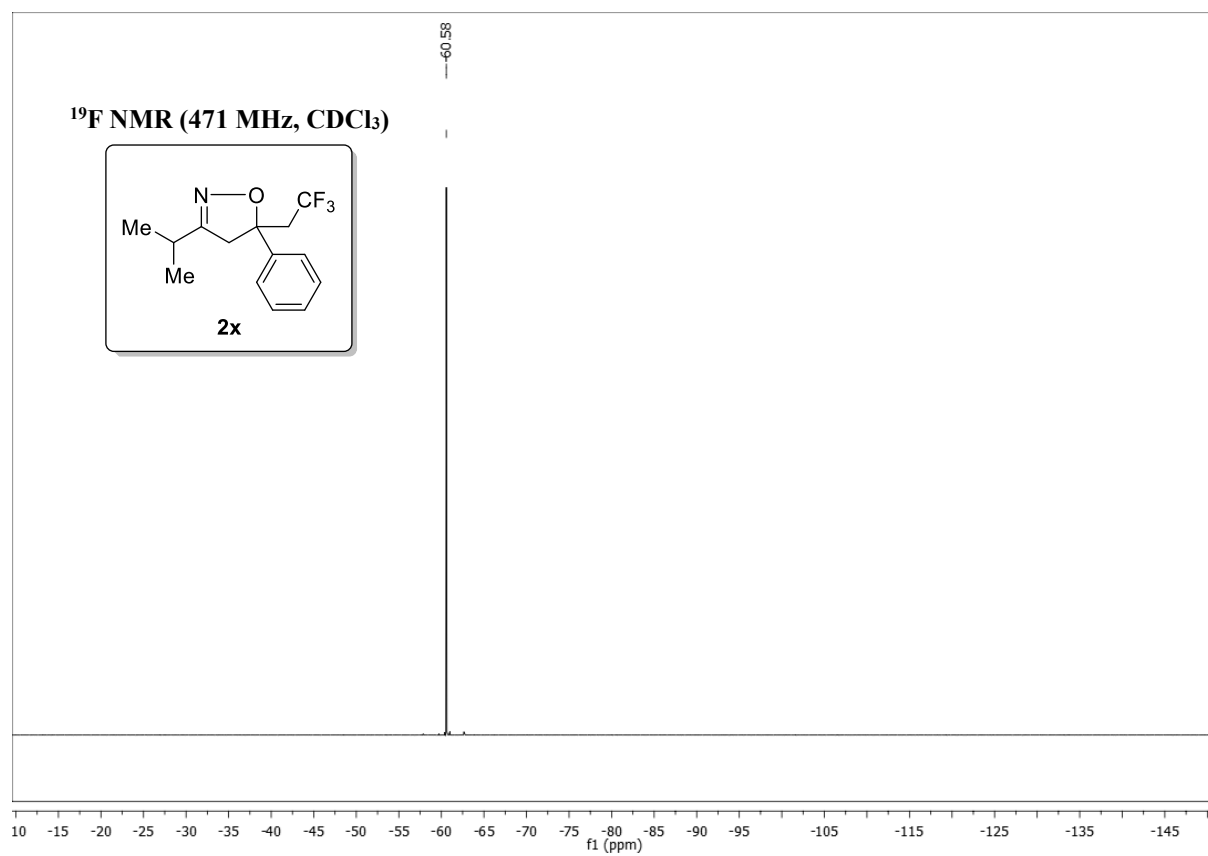

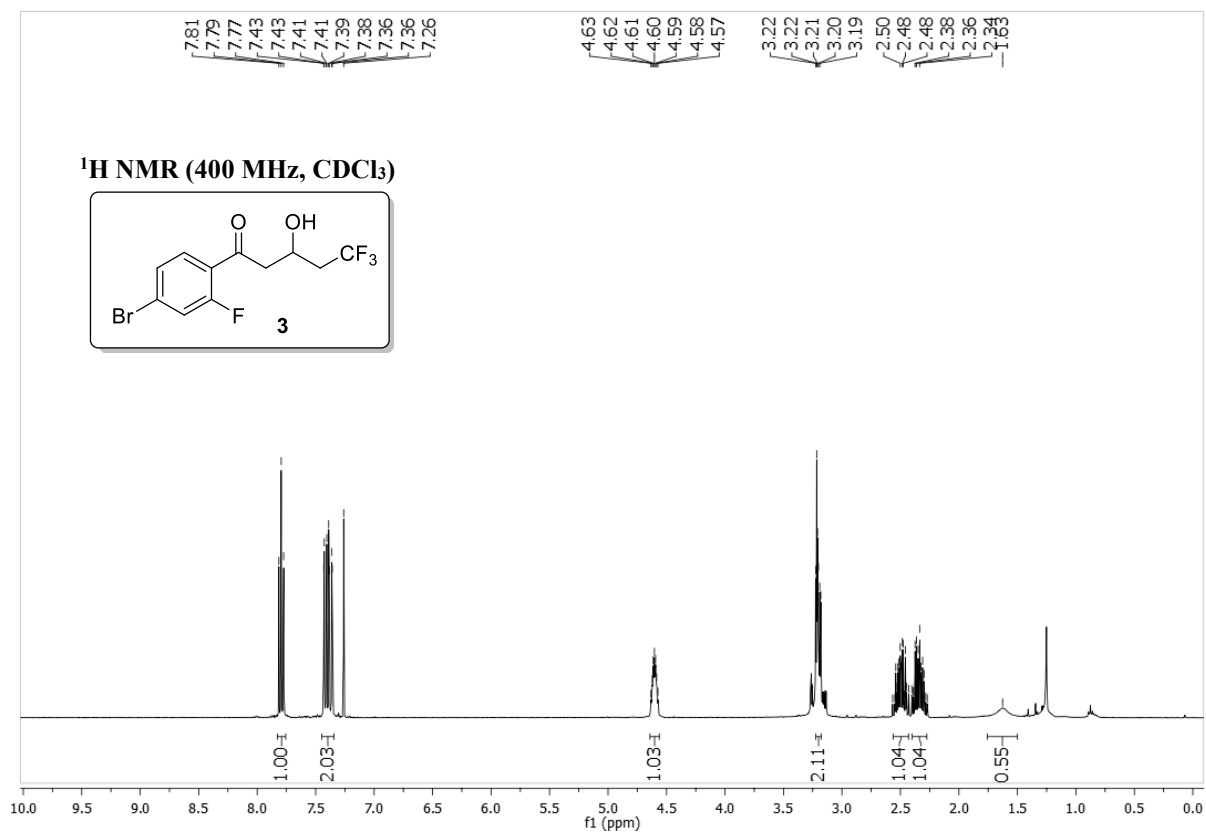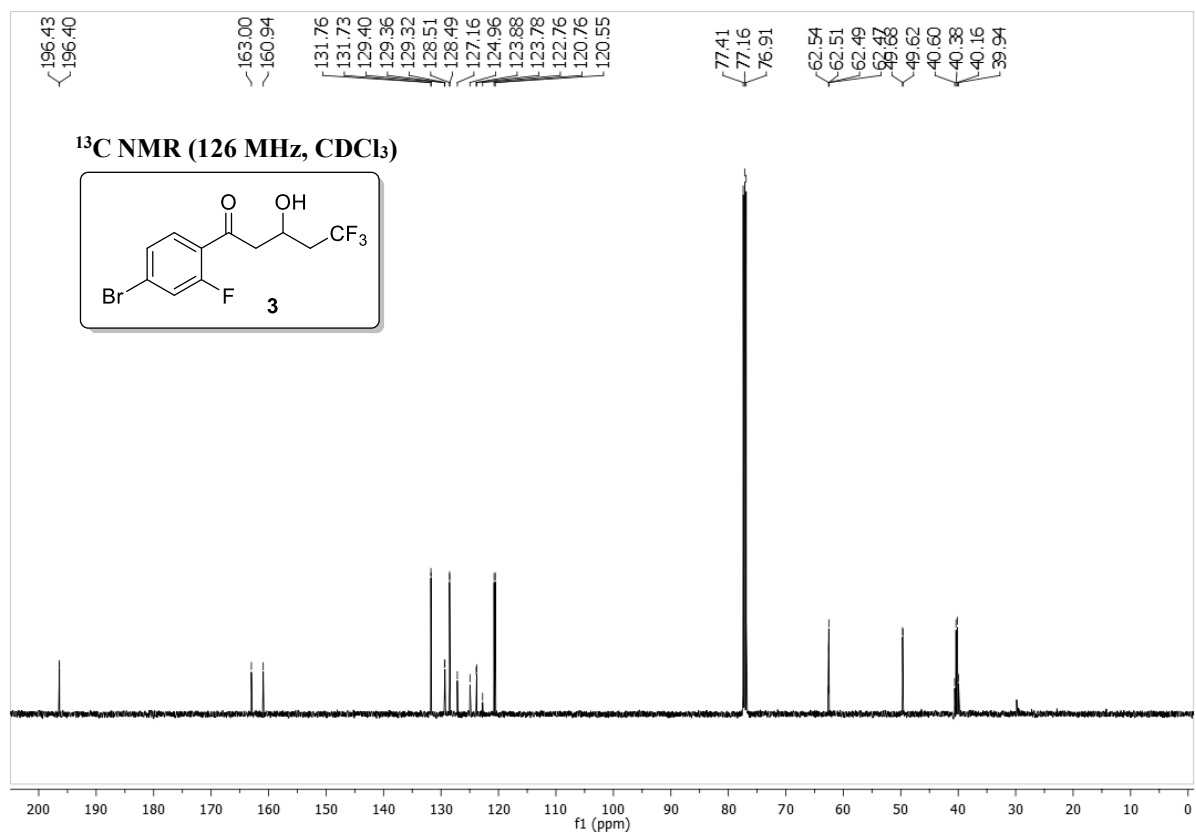

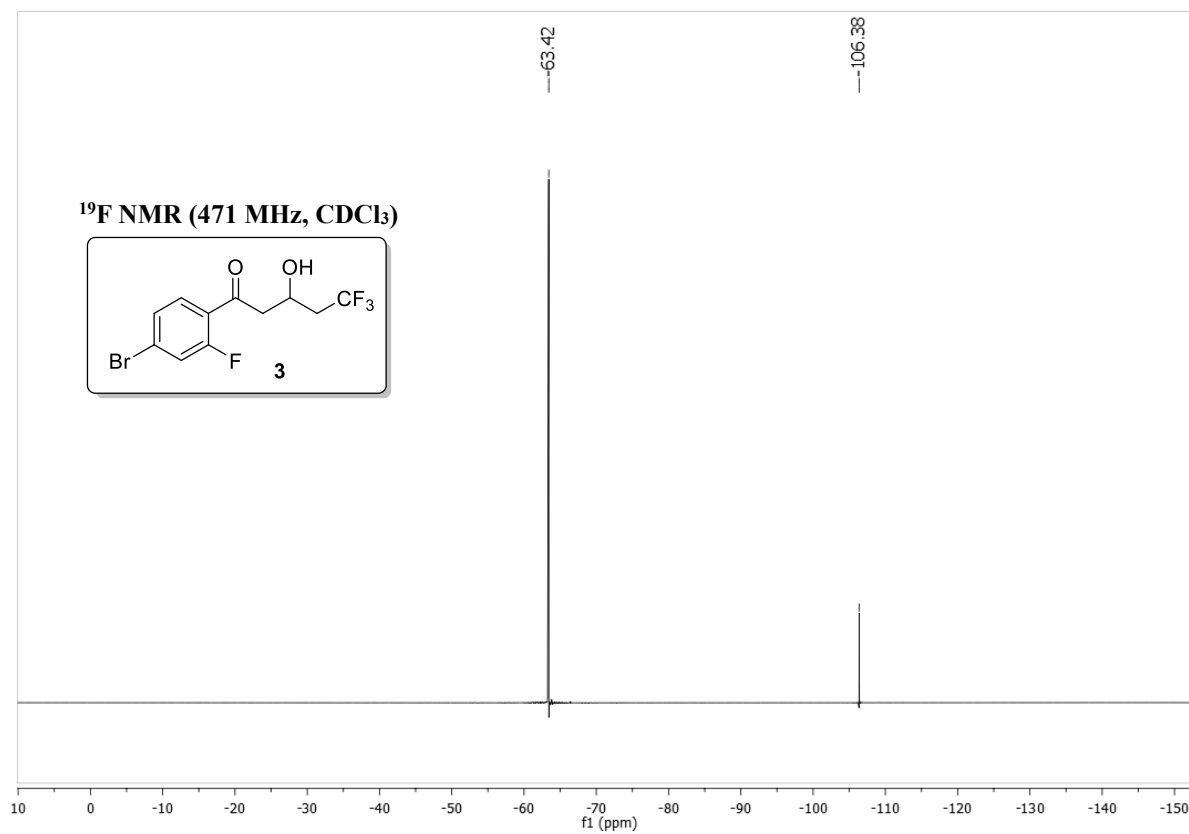

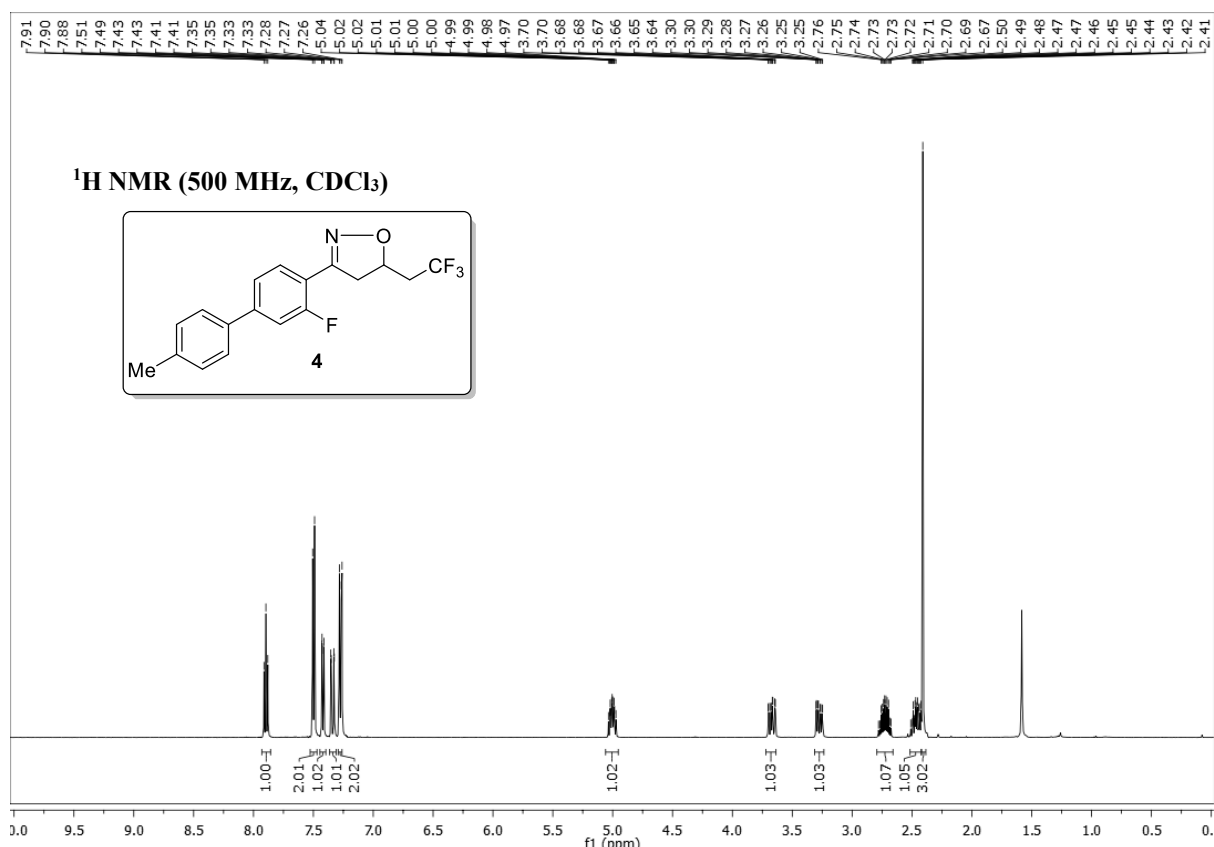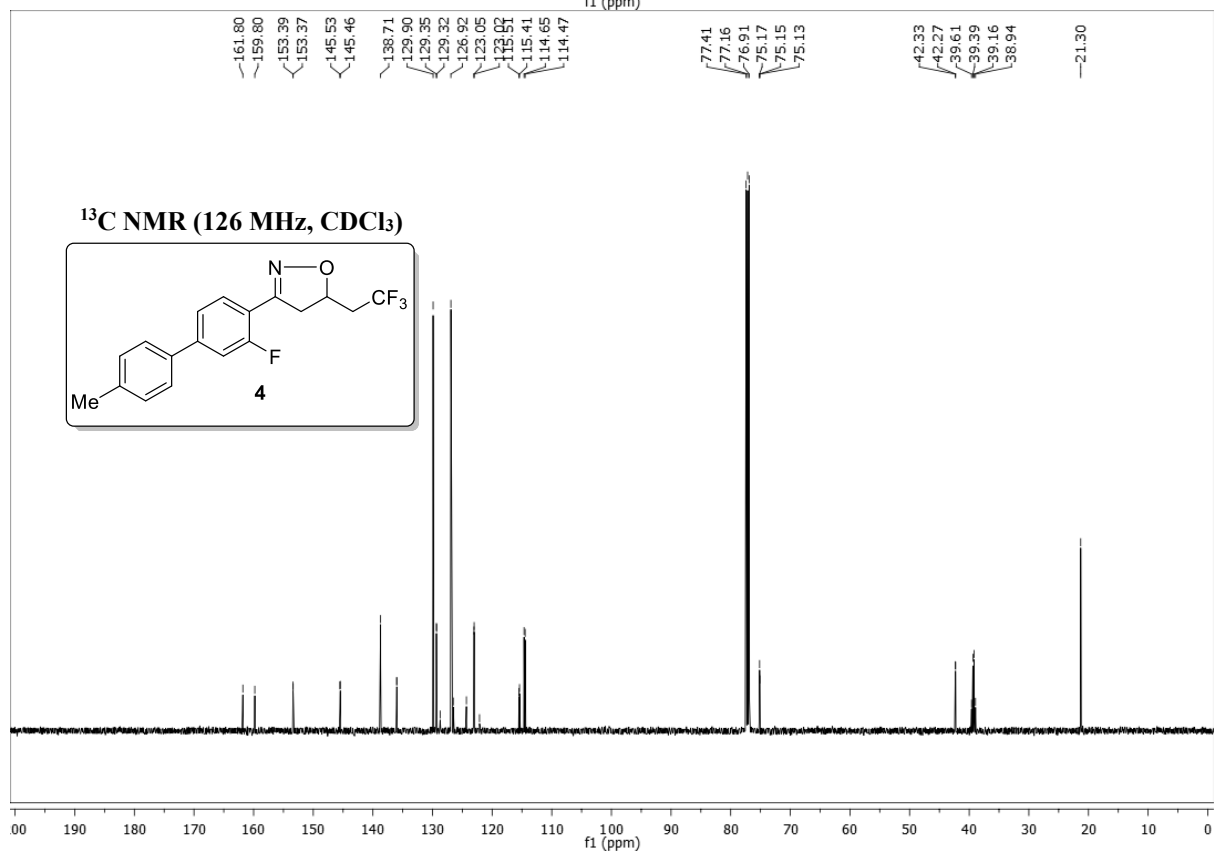

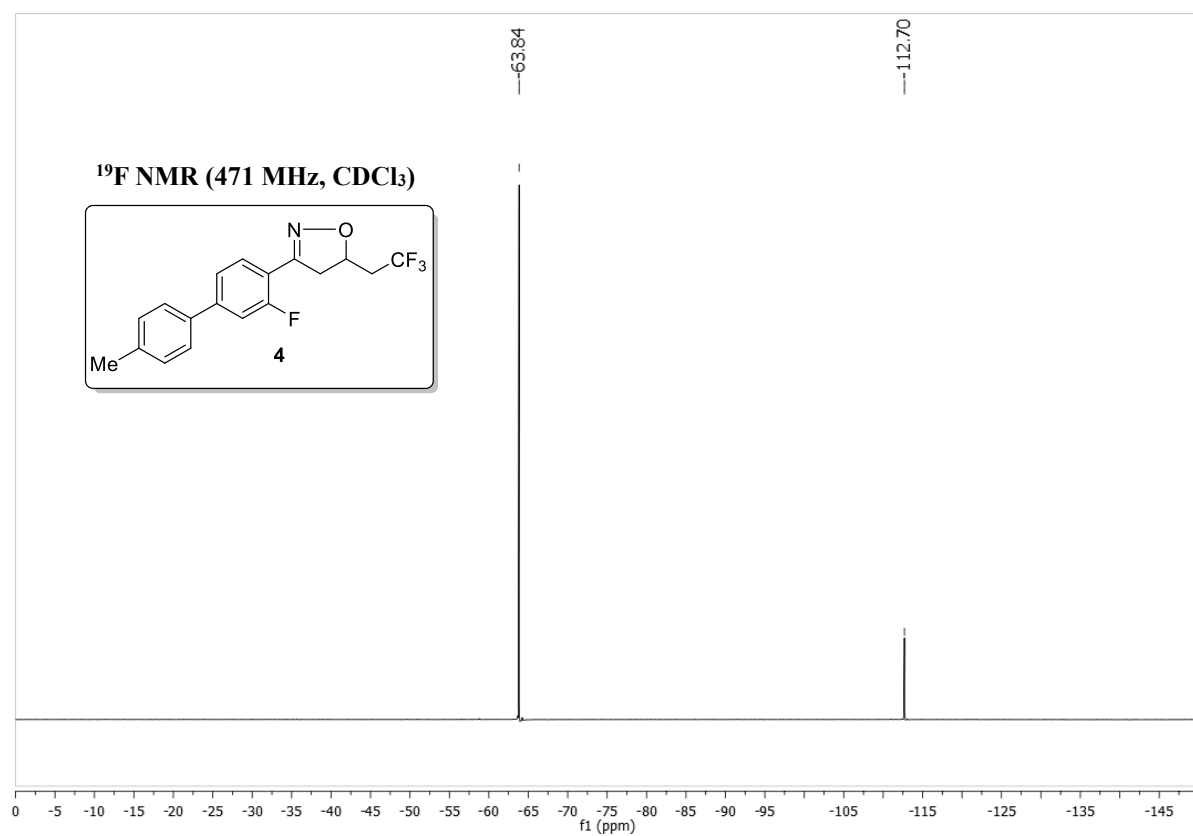

Supplement: d3cc00231d1.pdf [file d3cc00231d1.pdf]
